# Supplementary material for: Copper-catalyzed tandem annulation/arylation for the synthesis of diindolylmethanes from propargylic alcohols
Source: Royal Society of Chemistry journal article supplement (doi:10.1039/c4cc05901h), 2014-09-02

## Copper-catalyzed Tandem Annulation/Arylation for the synthesis of Diindolymethanes from Propargylic Alcohols

Hui Li,<sup>†,‡</sup> Xiaoxun Li,<sup>†</sup> Hao-Yuan Wang,<sup>†</sup> Gabrielle N. Winston-McPherson,<sup>†</sup> Hao-miao Julie Geng,<sup>†</sup> Iliia A. Guzei,<sup>§</sup> Weiping Tang<sup>†,§,\*</sup>

<sup>†</sup> School of Pharmacy, University of Wisconsin, Madison, WI, 53705, USA; <sup>‡</sup> School of Pharmaceutical Science and Technology, Tianjin University, Tianjin, 300072, P. R. China; <sup>§</sup> Department of Chemistry, University of Wisconsin, Madison, WI, 53706, USA

### General Remarks

All reactions in non-aqueous media were conducted under a positive pressure of dry argon in glassware that had been oven dried prior to use unless noted otherwise. Anhydrous solutions were transferred via an oven dried syringe or cannula. All solvents were dried prior to use unless noted otherwise. Thin layer chromatography was performed using precoated silica gel plates (EMD Chemical Inc. 60, F254). Flash column chromatography was performed with silica gel (Silicycle, 40-63  $\mu\text{m}$ ). Infrared spectra (IR) were obtained on a Bruker Equinox 55 Spectrophotometer.  $^1\text{H}$  and  $^{13}\text{C}$  nuclear magnetic resonance spectra (NMR) were obtained on a Varian Unity-Inova 400 MHz or 500 MHz recorded in ppm ( $\delta$ ) downfield of TMS ( $\delta=0$ ) in  $\text{CDCl}_3$  unless noted otherwise. Signal splitting patterns were described as singlet (s), doublet (d), triplet (t), quartet (q), quintet (quint), or multiplet (m), with coupling constants ( $J$ ) in hertz. High resolution mass spectra (HRMS) were performed by Analytical Instrument Center at the School of Pharmacy on an Electron Spray Injection (ESI) mass spectrometer. The optical rotation was determined using a Perkin-Elmer 241 Polarimeter.

## Experimental procedure for the preparation of propargylic alcohol substrates:

### 1) Preparation of substrates **7** and **11a-11c**<sup>1-4</sup>

Ketones **S2** and **S3** were prepared from **S1**.<sup>1</sup>

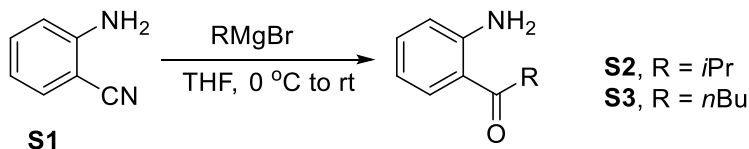

To a solution of 2-aminobenzonitrile **S1** (0.50 g, 4.2 mmol) in THF (4 mL) was added isopropylmagnesium bromide (16.8 mL, 0.5 M in THF, 8.4 mmol) at 0 °C over 5 min. The reaction was then allowed to warm to ambient temperature and stir at this temperature for 1h. The reaction was quenched by slow addition of 1 M HCl. The mixture was extracted by EtOAc. The combined organic layers was washed with NaHCO<sub>3</sub> and brine, dried over Na<sub>2</sub>SO<sub>4</sub>, and concentrated under vacuum. The residue was purified by flash column chromatography (10-30% EtOAc in hexanes) to give **S2** (0.60 g, 88%) as colorless oil.

Following the same procedure, **S3** was prepared from **S1** in 44.3 mmol scale (4.61 g, 59%) as colorless oil.

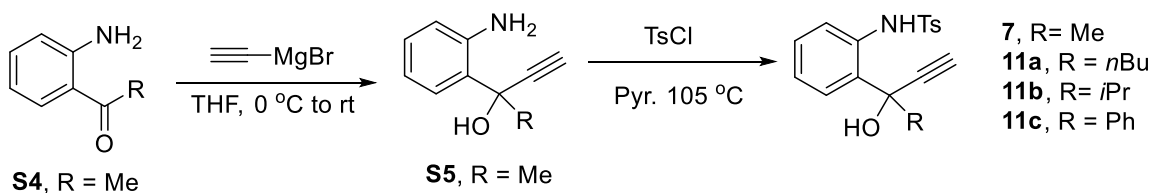

Commercially available 1-(2-aminophenyl)ethanone **S4** (2.12 g, 15.7 mmol) was dissolved in dry THF (100 mL). To the above solution was added ethynylmagnesium bromide (157 mL, 0.5 M in THF, 78.5 mmol) at 0 °C over 30 min with stirring. After additional stirring at 0 °C for 15 min, the mixture was allowed to warm up to room temperature, and stirred over night. The reaction was quenched by saturated aqueous NH<sub>4</sub>Cl. The mixture was extracted with EtOAc and the combined organic layers were washed with brine and dried over Na<sub>2</sub>SO<sub>4</sub>. The solvent was removed under vacuum and the crude product **S5** was directly used for the next step.

To a solution of crude **S5** was added tosyl chloride (1.05 equiv) in pyridine (0.8 M) and the resulting solution was stirred at 105 °C for 30 min under argon. The reaction mixture was cooled to room temperature and diluted with EtOAc. The mixture was washed with 3 M HCl and brine, dried over Na<sub>2</sub>SO<sub>4</sub> and concentrated under vacuum. The resulting residue was purified with flash column chromatography (10-30% EtOAc in hexanes) to give the pure product **7**<sup>4</sup> (2.56 g, 62% for two steps) as white solid.

Other substrates were prepared following the same procedure.

**11a** (0.69 g, 48%); **11b** (0.94 g, 69%); **11c**<sup>5</sup> (1.87 g, 56%).

## 2) Preparation of substrate 11d:

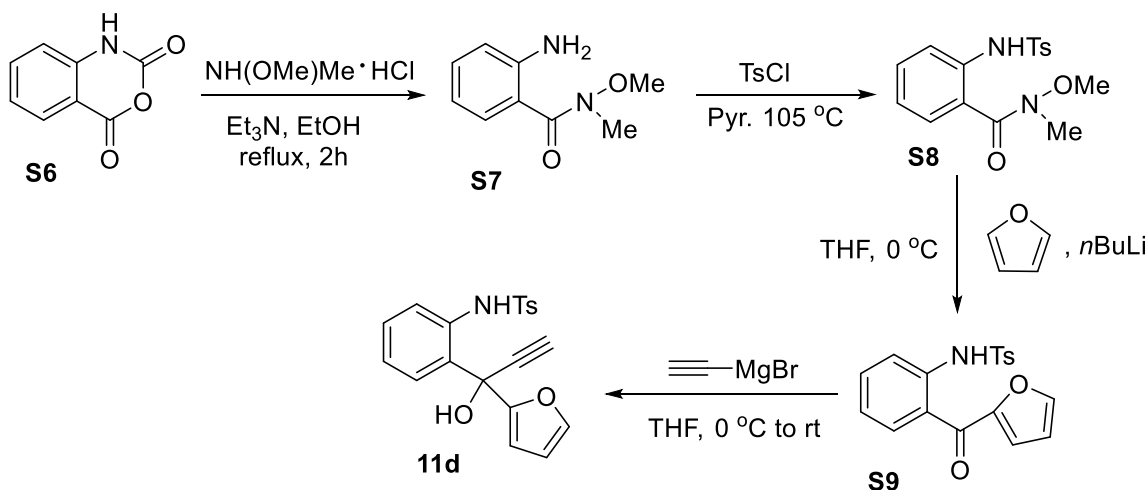

To a solution of *N,O*-dimethylhydroxylamine hydrochloride (14.6 g, 0.15 mol) in 90% aqueous ethanol (57 mL) was added triethylamine (20.8 mL, 0.15 mol) and after 10 min of stirring at room temperature. To the above solution was added isatonic anhydride **S6** (16.3 g, 0.1 mol) in several portions. The reaction was then heated at reflux for 2h and poured onto an equal volume of ice and saturated aqueous Na<sub>2</sub>CO<sub>3</sub>. The ethanol was then removed under vacuum and the resulting aqueous mixture was extracted with EtOAc. The combined organic layers were washed with water and brine, dried over Na<sub>2</sub>SO<sub>4</sub> and concentrated. The resulting residue was purified by column chromatography on silica gel (10-30% EtOAc in hexanes) to give **S7** as a yellow oil (14.4 g, 80%).

Following the same procedure<sup>3</sup> for the preparation of **7** from **S5**, we prepared **S8** from **S7** in 50 mmol scale to obtain (8.16 g, 49%) of the product.

We adapted literature procedure for the preparation of **S9**.<sup>6</sup>

To a solution of furan (0.48 mL, 6.0 mmol) in THF (20 mL) was added *n*BuLi (1.2 mL, 2.5 M in hexanes, 3.0 mmol) dropwise at -78 °C. The solution was then allowed to warm to rt and stirred over night. The solution was then cooled to 0 °C. To this solution was added **S8** (0.67 g, 2.0 mmol) in THF (2 mL). After the addition was complete, the reaction was stirred at 0 °C for 4h. Reaction was diluted with EtOAc and quenched with saturated aqueous NH<sub>4</sub>Cl. The aqueous phase was extracted with EtOAc and the combined organic layers were washed with brine and dried over Na<sub>2</sub>SO<sub>4</sub>. The solvent was removed under vacuum and the resulting residue was purified by flash column chromatography (10-30% EtOAc in hexanes) to give product **S9** (0.61 g, 89%) as colorless oil.

Following the same procedure<sup>2</sup> for the preparation of **S5** from **S4**, we prepared **11d** from **S9** in 0.59 mmol scale to obtain (0.18 g, 67%) of the product.

### General experimental procedure for the preparation of diindolylmethanes:

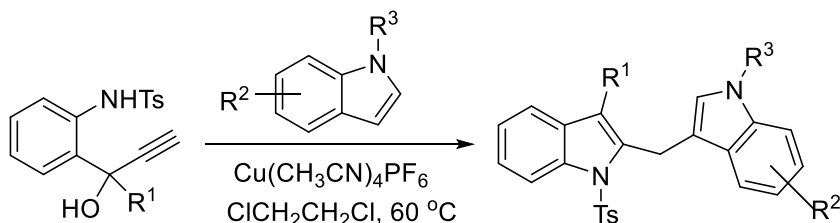

Propargylic alcohol (1.0 equiv) and tetrakis(acetonitrile) copper (I) hexafluorophosphate (10 mol%) were dissolved in 1,2-dichloroethane (0.1 M). To the above solution was added indole substrate (2.0 equiv). The mixture was stirred under argon at 60 °C for overnight. After the reaction was completed, the solvent was removed under reduced pressure. The crude product was purified by flash column chromatography (5% to 20% EtOAc in hexanes) to give the corresponding diindolylmethane.

### Characterization data:

Substrates **7**,<sup>4</sup> **11c**,<sup>5</sup> and **11e**<sup>7</sup> are known compounds.

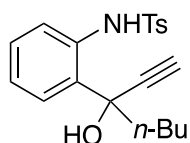

Compound **11a** was isolated as white solid (1.86 g, 61%). mp = 85-86 °C. <sup>1</sup>H NMR (400 MHz, CDCl<sub>3</sub>, TMS): δ 9.08 (s, 1H), 7.73 (d, *J* = 8.0 Hz, 2H), 7.65 (d, *J* = 8.0 Hz, 1H), 7.56 (dd, *J* = 8.0, 1.6 Hz, 1H), 7.26-7.21 (m, 3H), 7.01 (t, *J* = 8.0 Hz, 1H), 3.02 (s, 1H), 2.78 (s, 1H), 2.36 (s, 3H), 1.79-1.71 (m, 1H), 1.67-1.60 (m, 1H), 1.38-1.32 (m, 1H), 1.17-0.98 (m, 3H), 0.80 (t, *J* = 8.0 Hz, 3H). <sup>13</sup>C NMR (100 MHz, CDCl<sub>3</sub>): δ 143.9, 137.1, 135.7, 130.2, 129.8, 129.1, 128.7, 127.2, 123.5, 120.2, 84.8, 76.2, 76.0, 42.6, 27.0, 22.5, 21.6, 14.1. IR (neat) ν 3675, 2949, 2877, 1734, 1717, 1692, 1641, 1513. HRMS (ESI) *m/z* calcd for C<sub>20</sub>H<sub>23</sub>NO<sub>3</sub>S (M+Na)<sup>+</sup> 380.1291, found 380.1293.

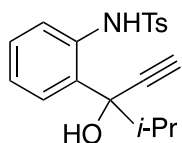

Compound **11b** was isolated as colorless solid (2.15 g, 76%). mp = 111-113 °C. <sup>1</sup>H NMR (400 MHz, CDCl<sub>3</sub>, TMS): δ 8.97 (s, 1H), 7.70 (d, *J* = 8.0 Hz, 2H), 7.65 (d, *J* = 8.0 Hz, 1H), 7.56 (d, *J* = 8.0 Hz, 1H), 7.26-7.21 (m, 3H), 7.00 (t, *J* = 8.0 Hz, 1H), 2.99 (s, 1H), 2.78 (s, 1H), 2.37 (s, 3H), 1.79 (m, 1H), 1.04 (d, *J* = 8.0 Hz, 3H), 0.44 (d, *J* = 8.0 Hz, 3H). <sup>13</sup>C NMR (100 MHz, CDCl<sub>3</sub>): δ 144.0, 137.4, 135.8, 130.0, 129.9, 129.8, 129.3, 127.3, 123.4, 120.9, 82.6, 80.4, 77.6, 37.2, 21.7, 18.5, 17.2. IR (neat) ν 3676, 2947, 1734, 1717, 1678, 1641, 1530. HRMS (ESI) *m/z* calcd for C<sub>19</sub>H<sub>21</sub>NO<sub>3</sub>S (M+Na)<sup>+</sup> 366.1134, found 366.1137.

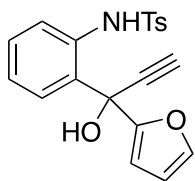

Compound **11d** was isolated as colorless solid (0.15 g, 67%). mp = 123-124 °C. <sup>1</sup>H NMR (500 MHz, CDCl<sub>3</sub>, TMS): δ 8.69 (s, 1H), 7.69 (d, *J* = 5.0 Hz, 2H), 7.62 (d, *J* = 10 Hz, 1H), 7.40-7.34 (m, 2H), 7.28-7.24 (m, 1H), 7.20 (d, *J* = 10 Hz, 2H), 7.01-6.98 (m, 1H), 6.30-6.29 (m, 1H), 6.17 (d, *J* = 5.0 Hz, 1H), 3.43 (s, 1H), 2.84 (s, 1H), 2.37 (s, 3H). <sup>13</sup>C NMR (100 MHz, CDCl<sub>3</sub>): δ 152.9, 143.9, 143.8, 137.1, 136.5, 130.1, 129.8, 129.0, 127.8, 127.7, 123.5, 119.6, 110.9, 109.2, 82.4, 76.9, 71.3, 21.8. IR (neat) ν 3681, 2944, 1734, 1652, 1537. HRMS (ESI) *m/z* calcd for C<sub>20</sub>H<sub>17</sub>NO<sub>4</sub>S (M+Na)<sup>+</sup> 390.0771, found 390.0790.

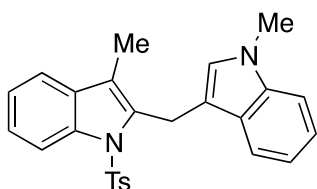

Compound **9a** was isolated as brown oil (16 mg, 76%, [0.05 mmol]; 62 mg, 73% [0.2 mmol]). <sup>1</sup>H NMR (500 MHz, CDCl<sub>3</sub>, TMS): δ 8.23 (d, *J* = 5.0 Hz, 1H), 7.60 (d, *J* = 10.0 Hz, 1H), 7.44 (d, *J* = 10.0 Hz, 1H), 7.30-7.24 (m, 4H), 7.22-7.19 (m, 2H), 7.11-7.08 (m, 1H), 6.86 (d, *J* = 10.0 Hz, 2H), 6.39 (s, 1H), 4.51 (s, 2H), 3.53 (s, 3H), 2.24 (s, 3H), 2.23 (s, 3H). <sup>13</sup>C NMR (100 MHz, CDCl<sub>3</sub>): δ 144.1, 137.1, 137.0, 136.5, 135.7, 131.4, 129.3, 127.74, 127.69, 126.5, 124.5, 123.5, 121.7, 119.2, 119.1, 118.8, 117.3, 115.4, 112.1, 109.2, 32.7, 22.1, 21.7, 9.5. IR (neat) ν 3681, 3639, 2928, 1652, 1537. HRMS (ESI) *m/z* calcd for C<sub>26</sub>H<sub>24</sub>N<sub>2</sub>O<sub>2</sub>S (M+Na)<sup>+</sup> 451.1451, found 451.1460.

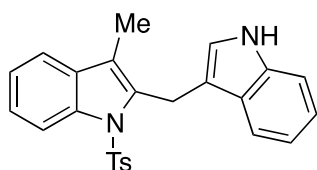

Compound **9b** was isolated as white solid (15 mg, 75%). mp=176-178 °C. <sup>1</sup>H NMR (500 MHz, CDCl<sub>3</sub>, TMS): δ 8.20 (d, *J* = 10.0 Hz, 1H), 7.80 (s, 1H), 7.58 (d, *J* = 10.0, 1H), 7.42 (d, *J* = 5.0 Hz, 1H), 7.33 (d, *J* = 10.0 Hz, 2H), 7.30-7.22 (m, 3H), 7.14 (t, *J* = 10.0 Hz, 1H), 7.07 (t, *J* = 10.0 Hz, 1H), 6.87 (d, *J* = 5.0 Hz, 2H), 6.60 (s, 1H), 4.51 (s, 2H), 2.21 (s, 3H), 2.19 (s, 3H). <sup>13</sup>C NMR (125 MHz, CDCl<sub>3</sub>): δ 144.2, 136.9, 136.4, 136.2, 135.5, 131.5, 129.4, 127.3, 126.5, 124.5, 123.5, 123.0, 122.1, 119.6, 119.0, 118.8, 117.6, 115.4, 113.7, 111.3, 22.3, 21.7, 9.5. IR (neat) ν 3676, 2948, 1734, 1692, 1660, 1530.

HRMS (ESI)  $m/z$  calcd for  $C_{25}H_{22}N_2O_2S$  ( $M+Na$ )<sup>+</sup> 437.1294, found 437.1297. X-ray structure (CCDC 1016687).

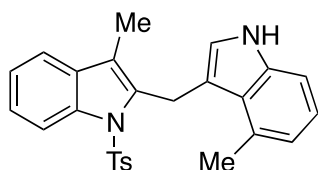

Compound **9c** was isolated as pink oil (33 mg, 77%). <sup>1</sup>H NMR (400 MHz, CDCl<sub>3</sub>, TMS): δ 8.28 (d,  $J$  = 8.0 Hz, 1H), 7.64 (s, 1H), 7.46 (d,  $J$  = 8.0 Hz, 1H), 7.40 (d,  $J$  = 8.0 Hz, 2H), 7.36-7.26 (m, 2H), 7.14-7.13 (m, 1H), 7.06 (d,  $J$  = 8.0 Hz, 1H), 6.93 (d,  $J$  = 8.0 Hz, 2H), 6.88 (d,  $J$  = 8.0 Hz, 1H), 6.13 (s, 1H), 4.78 (s, 2H), 2.84 (s, 3H), 2.24 (s, 3H), 2.15 (s, 3H). <sup>13</sup>C NMR (125 MHz, CDCl<sub>3</sub>): δ 144.3, 137.1, 136.8, 136.5, 135.5, 131.4, 131.3, 129.5, 126.8, 126.0, 124.5, 123.4, 122.44, 122.38, 121.3, 118.7, 117.4, 115.3, 115.0, 109.2, 24.4, 21.8, 21.0, 9.1. IR (neat)  $\nu$  3361, 2925, 1717, 1685, 1647, 1521. HRMS (ESI)  $m/z$  calcd for  $C_{26}H_{24}N_2O_2S$  ( $M+Na$ )<sup>+</sup> 451.1451, found 451.1454.

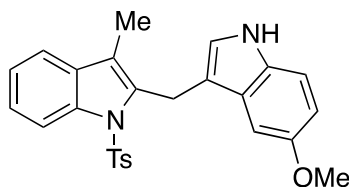

Compound **9d** was isolated as yellow oil (21 mg, 95%). <sup>1</sup>H NMR (500 MHz, CDCl<sub>3</sub>, TMS): δ 8.20 (d,  $J$  = 5.0 Hz, 1H), 7.69 (s, 1H), 7.43 (d,  $J$  = 10.0 Hz, 1H), 7.34 (d,  $J$  = 5.0 Hz, 2H), 7.31-7.28 (m, 1H), 7.18 (d,  $J$  = 5.0 Hz, 1H), 7.03 (d,  $J$  = 2.5 Hz, 1H), 6.91 (d,  $J$  = 10.0 Hz, 2H), 6.82 (dd,  $J$  = 10.0, 2.5 Hz, 1H), 6.63 (s, 1H), 4.50 (s, 2H), 3.82 (s, 3H), 2.25 (s, 3H), 2.23 (s, 3H). <sup>13</sup>C NMR (125 MHz, CDCl<sub>3</sub>): δ 154.3, 144.2, 136.9, 136.3, 135.5, 131.6, 131.5, 129.4, 127.7, 126.6, 124.5, 123.7, 123.5, 118.7, 117.6, 115.4, 113.6, 112.4, 111.9, 101.0, 56.1, 22.4, 21.7, 9.5. IR (neat)  $\nu$  3662, 3447, 2943, 1717, 1652, 1537, 1521. HRMS (ESI)  $m/z$  calcd for  $C_{26}H_{24}N_2O_3S$  ( $M+Na$ )<sup>+</sup> 467.1400, found 467.1403.

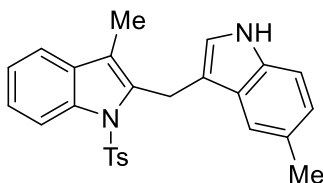

Compound **9e** was isolated as a yellow oil (29 mg, 68% yield).

<sup>1</sup>H NMR (400 MHz, CDCl<sub>3</sub>, TMS): δ 8.21 (d,  $J$  = 8.0 Hz, 1H), 7.69 (s, 1H), 7.45 – 7.34 (m, 4H), 7.33 – 7.26 (m, 2H), 7.20 (d,  $J$  = 8.4 Hz, 1H), 7.00 (d,  $J$  = 8.0 Hz, 1H), 6.93 (d,  $J$  = 8.4 Hz, 2H), 6.56 (d,  $J$  = 1.2 Hz, 1H), 4.50 (s, 2H), 2.46 (s, 3H), 2.24 (s, 3H), 2.20 (s, 3H). <sup>13</sup>C NMR (126 MHz, CDCl<sub>3</sub>): δ 144.2, 136.9, 136.3, 135.6, 134.8, 131.5, 129.5, 128.9,

127.6, 126.6, 124.4, 123.9, 123.5, 123.0, 118.8, 118.7, 117.6, 115.4, 113.4, 110.9, 22.2, 21.9, 21.7, 9.5. IR (neat)  $\nu$  3360, 2944, 2925, 1652, 1521  $\text{cm}^{-1}$ . HRMS (ESI) for  $\text{C}_{26}\text{H}_{24}\text{N}_2\text{O}_2\text{S}$  ( $\text{M}+\text{Na}$ ), 451.1451 (Calc.), found 451.1448

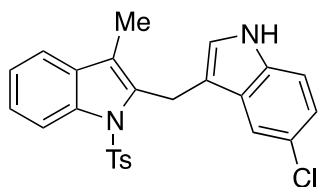

Compound **9f** was isolated as yellow oil (14 mg, 63%).  $^1\text{H}$  NMR (500 MHz,  $\text{CDCl}_3$ , TMS):  $\delta$  8.20 (d,  $J = 5.0$  Hz, 1H), 7.86 (s, 1H), 7.54 (d,  $J = 2.0$  Hz, 1H), 7.44 (d,  $J = 5.0$  Hz, 1H), 7.38 (d,  $J = 10.0$  Hz, 2H), 7.32-7.27 (m, 2H), 7.20 (d,  $J = 10.0$  Hz, 1H), 7.11 (dd,  $J = 10.0, 2.0$  Hz, 1H), 6.96 (d,  $J = 10.0$  Hz, 2H), 6.71 (s, 1H), 4.46 (s, 2H), 2.25 (s, 3H), 2.23 (s, 3H).  $^{13}\text{C}$  NMR (125 MHz,  $\text{CDCl}_3$ ):  $\delta$  144.4, 137.0, 136.3, 135.0, 134.7, 131.5, 129.6, 128.4, 126.5, 125.4, 124.6, 124.4, 123.6, 122.5, 118.9, 118.6, 117.8, 115.4, 113.8, 112.2, 22.3, 21.8, 9.5. IR (neat)  $\nu$  3399, 2926, 2253, 1726, 1598. HRMS (ESI)  $m/z$  calcd for  $\text{C}_{25}\text{H}_{21}\text{ClN}_2\text{O}_2\text{S}$  ( $\text{M}+\text{Na}$ ) $^+$  471.0904, found 471.0905.

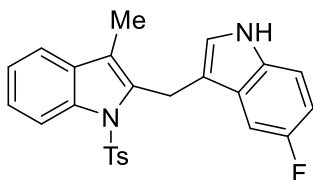

Compound **9g** was isolated as a brown solid (43 mg, 70% yield). mp = 55-60  $^{\circ}\text{C}$   
 $^1\text{H}$  NMR (500 MHz,  $\text{CDCl}_3$ ):  $\delta$  2.158 (s, 3H), 2.161 (s, 3H), 4.38 (s, 2H), 6.67 (d,  $J = 0.5$  Hz, 1H), 6.81 (td,  $J = 7.5, 2.5$  Hz, 1H), 6.86 (d,  $J = 8.5$  Hz, 2H), 7.09-7.12 (m, 2H), 7.18-7.23 (m, 2H), 7.28 (d,  $J = 8.5$ , 2H), 7.36 (d,  $J = 8.5$ , 1H), 7.78 (broad s, 1H), 8.12 (d,  $J = 7.5$ , 1H).  $^{13}\text{C}$  NMR (100 MHz,  $\text{CDCl}_3$ ):  $\delta$  9.5, 21.7, 22.4, 104.0 (d,  $J = 22.9$  Hz), 110.5 (d,  $J = 26.7$  Hz), 111.8 (d,  $J = 9.1$  Hz), 114.1, 115.4, 117.8, 118.9, 123.6, 124.6, 124.9, 126.5, 129.5, 131.5, 132.9, 135.1, 136.3, 137.0, 144.3, 158.0 (d,  $J = 232.9$  Hz).  $\delta$  IR (neat) 1358.92, 1486.49, 1581.04, 1597.66, 1710.37, 2853.40, 2923.35, 3422.05  $\nu$   $\text{cm}^{-1}$ . HRMS (ESI)  $M/Z$  calcd. for  $\text{C}_{25}\text{H}_{21}\text{FN}_2\text{O}_2\text{S}$  ( $\text{M} + \text{Na}$ ) $^+$  455.1200, found 455.1200.

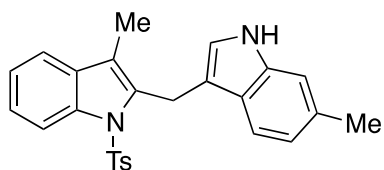

Compound **9h** was isolated as yellow oil (33 mg, 77%).  $^1\text{H}$  NMR (400 MHz,  $\text{CDCl}_3$ , TMS):  $\delta$  8.20 (d,  $J = 4.0$  Hz, 1H), 7.67 (s, 1H), 7.46 (d,  $J = 8.0$  Hz, 1H), 7.43-7.41 (m, 1H), 7.34 (d,  $J = 8.0$  Hz, 2H), 7.31-7.25 (m, 1H), 7.23-7.19 (m, 1H), 7.08 (s, 1H), 6.93-

6.90 (m, 3H), 6.58 (s, 1H), 4.50 (s, 2H), 2.44 (s, 3H), 2.23 (s, 3H), 2.22 (s, 3H).  $^{13}\text{C}$  NMR (100 MHz,  $\text{CDCl}_3$ ):  $\delta$  144.2, 136.93, 136.91, 136.3, 135.7, 132.0, 131.5, 129.5, 126.6, 125.3, 124.4, 123.5, 122.3, 121.5, 118.8, 118.7, 117.5, 115.4, 113.7, 111.2, 22.3, 22.0, 21.7, 9.5. IR (neat)  $\nu$  3663, 3446, 2949, 2882, 1734, 1717, 1652, 1537. HRMS (ESI)  $m/z$  calcd for  $\text{C}_{26}\text{H}_{24}\text{N}_2\text{O}_2\text{S}$  ( $\text{M}+\text{Na}$ ) $^+$  451.1451, found 451.1445.

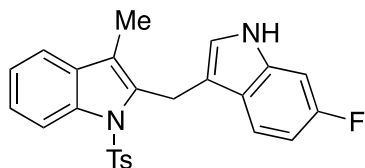

Compound **9i** was isolated as colorless oil (30 mg, 70%).  $^1\text{H}$  NMR (400 MHz,  $\text{CDCl}_3$ , TMS):  $\delta$  8.20 (d,  $J = 8.0$  Hz, 1H), 7.80 (s, 1H), 7.49-7.43 (m, 2H), 7.33 (d,  $J = 8.0$  Hz, 2H), 7.30-7.25 (m, 2H), 6.98 (dd,  $J = 9.6, 2.4$  Hz, 1H), 6.93 (d,  $J = 8.0$  Hz, 2H), 6.88-6.83 (m, 1H), 6.66-6.65 (m, 1H), 4.50 (s, 2H), 2.25 (s, 3H), 2.24 (s, 3H).  $^{13}\text{C}$  NMR (100 MHz,  $\text{CDCl}_3$ ):  $\delta$  160.3 (d,  $J = 236.8$  Hz), 144.3, 137.0, 136.3, 135.2, 131.4, 129.5, 126.5, 124.6, 124.0, 123.6, 123.2, 119.9 (d,  $J = 10$  Hz), 118.8, 117.7, 115.4, 114.1, 108.5 (d,  $J = 24$  Hz), 97.5 (d,  $J = 26$  Hz), 22.3, 21.7, 9.5. IR (neat)  $\nu$  3649, 2948, 1734, 1692, 1641, 1513. HRMS (ESI)  $m/z$  calcd for  $\text{C}_{25}\text{H}_{22}\text{N}_2\text{O}_2\text{SF}$  ( $\text{M}+\text{Na}$ ) $^+$  455.1200, found 455.1198.

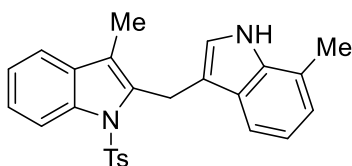

Compound **9j** was isolated as a yellow oil (28 mg, 67% yield).

$^1\text{H}$  NMR (400 MHz,  $\text{CDCl}_3$ , TMS):  $\delta$  8.20 (d,  $J = 8.0$  Hz, 1H), 7.69 (s, 1H), 7.43 (d,  $J = 7.6$  Hz, 2H), 7.37 – 7.22 (m, 4H), 6.98 (m, 2H), 6.88 (d,  $J = 8.4$  Hz, 2H), 6.63 (d,  $J = 1.2$  Hz, 1H), 4.51 (s, 2H), 2.42 (s, 3H), 2.22 (s, 3H), 2.22 (s, 3H).  $^{13}\text{C}$  NMR (100 MHz,  $\text{CDCl}_3$ ):  $\delta$  144.1, 137.0, 136.4, 135.6, 131.5, 129.4, 126.9, 126.5, 124.5, 123.5, 122.73, 122.69, 120.3, 119.9, 118.8, 117.6, 116.9, 115.4, 114.4, 22.5, 21.7, 16.8, 9.5. IR (neat)  $\nu$  3388, 2922, 2854, 1652, 1457  $\text{cm}^{-1}$ . HRMS (ESI) for  $\text{C}_{26}\text{H}_{24}\text{N}_2\text{O}_2\text{S}$  ( $\text{M}+\text{Na}$ ), 451.1451 (Calc.), found 451.1449.

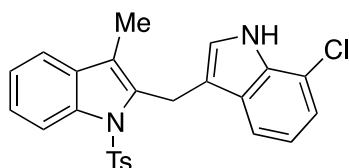

Compound **9k** was isolated as colorless oil (26 mg, 59%).  $^1\text{H}$  NMR (500 MHz,  $\text{CDCl}_3$ , TMS):  $\delta$  8.21 (d,  $J = 5.0$  Hz, 1H), 7.95 (s, 1H), 7.47-7.43 (m, 2H), 7.33-7.24 (m, 3H), 7.14



(d,  $J = 5.0$  Hz, 1H), 7.01-6.98 (m, 1H), 6.85 (d,  $J = 10.0$  Hz, 2H), 6.67 (s, 1H), 4.50 (s, 2H), 2.26 (s, 3H), 2.22 (s, 3H).  $^{13}\text{C}$  NMR (125 MHz,  $\text{CDCl}_3$ ):  $\delta$  144.2, 137.1, 136.4, 135.0, 133.6, 131.2, 129.3, 128.8, 126.2, 124.7, 123.7, 123.5, 121.5, 120.5, 118.8, 117.8, 117.6, 116.7, 115.3, 114.9, 22.4, 21.7, 9.5. IR (neat)  $\nu$  3674, 3384, 2949, 1734, 1717, 1678, 1641, 1631, 1513. HRMS (ESI)  $m/z$  calcd for  $\text{C}_{25}\text{H}_{21}\text{ClN}_2\text{O}_2\text{S}$  ( $\text{M}+\text{Na}$ ) $^+$  471.0904, found 471.0897.

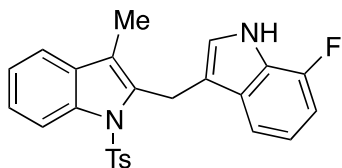

Compound **9l** was isolated as brown oil (35 mg, 81%).  $^1\text{H}$  NMR (400 MHz,  $\text{CDCl}_3$ , TMS):  $\delta$  8.13 (d,  $J = 8.0$  Hz, 1H), 7.87 (s, 1H), 7.39-7.37 (m, 1H), 7.25-7.18 (m, 6H), 6.91 (ddd,  $J = 20.0, 12.0, 4.0$  Hz, 1H), 6.83 (d,  $J = 8.0$  Hz, 2H), 6.62 (s, 1H), 4.44 (s, 2H), 2.18 (s, 3H), 2.16 (s, 3H).  $^{13}\text{C}$  NMR (100 MHz,  $\text{CDCl}_3$ ):  $\delta$  149.7 (d,  $J = 242.8$  Hz), 144.3, 137.1, 136.4, 135.1, 131.2 (d,  $J = 29.8$  Hz), 129.9, 129.2 (d,  $J = 40$  Hz), 126.4, 124.6, 123.7, 123.6, 120.0 (d,  $J = 6.1$  Hz), 118.8, 117.7, 115.4, 115.0, 114.9, 114.8, 107.0 (d,  $J = 15$  Hz), 22.4, 21.7, 9.5. IR (neat)  $\nu$  3801, 3344, 1749, 1734, 1652, 1530. HRMS (ESI)  $m/z$  calcd for  $\text{C}_{25}\text{H}_{21}\text{FN}_2\text{O}_2\text{S}$  ( $\text{M}+\text{Na}$ ) $^+$  455.1200, found 455.1202.

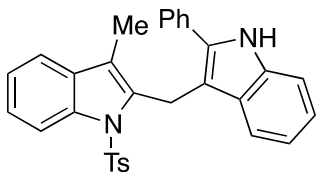

Compound **9m** was isolated as colorless oil (35 mg, 71%).  $^1\text{H}$  NMR (500 MHz,  $\text{CDCl}_3$ , TMS):  $\delta$  8.25 (d,  $J = 5.0$  Hz, 1H), 8.04 (s, 1H), 7.51 (d,  $J = 10.0$  Hz, 2H), 7.41-7.22 (m, 9H), 7.08 (t,  $J = 10.0$  Hz, 1H), 7.00-6.94 (m, 3H), 6.84-6.81 (m, 1H), 4.66 (s, 2H), 2.26 (s, 3H), 1.81 (s, 3H).  $^{13}\text{C}$  NMR (125 MHz,  $\text{CDCl}_3$ ):  $\delta$  144.3, 137.0, 136.6, 135.9, 135.2, 134.3, 133.2, 131.7, 129.6, 129.3, 129.1, 128.4, 128.0, 126.3, 124.5, 123.4, 122.4, 120.0, 119.6, 118.6, 118.0, 115.2, 110.9, 109.4, 24.0, 21.8, 9.0. IR (neat)  $\nu$  3675, 2948, 1749, 1734, 1661, 1513. HRMS (ESI)  $m/z$  calcd for  $\text{C}_{31}\text{H}_{26}\text{N}_2\text{O}_2\text{S}$  ( $\text{M}+\text{Na}$ ) $^+$  513.1607, found 513.1617.

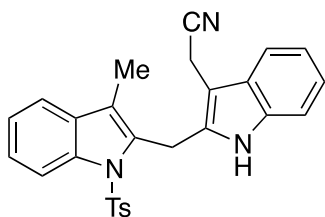

Compound **10** was isolated as colorless oil (35 mg, 78%).  $^1\text{H}$  NMR (400 MHz,  $\text{CDCl}_3$ , TMS):  $\delta$  8.20 (d,  $J = 8.0$  Hz, 1H), 8.17 (s, 1H), 7.58-7.56 (m, 1H), 7.47 (d,  $J = 8.0$  Hz, 1H),

7.38-7.25 (m, 4H), 7.17-7.14 (m, 3H), 6.84 (d,  $J = 8.0$  Hz, 2H), 4.56 (s, 2H), 3.89 (s, 2H), 2.33 (s, 3H), 2.19 (s, 3H).  $^{13}\text{C}$  NMR (100 MHz,  $\text{CDCl}_3$ ):  $\delta$  145.1, 137.1, 135.6, 135.2, 132.9, 131.6, 131.0, 129.8, 127.4, 126.2, 125.5, 124.1, 122.6, 120.5, 119.3, 119.2, 118.4, 118.0, 115.5, 111.3, 100.6, 23.3, 21.7, 13.3, 9.6. IR (neat)  $\nu$  3337, 1734, 1717, 1652, 1513. HRMS (ESI)  $m/z$  calcd for  $\text{C}_{27}\text{H}_{23}\text{N}_3\text{O}_2\text{S}$  ( $\text{M}+\text{Na}$ ) $^+$  476.1403, found 476.1407.

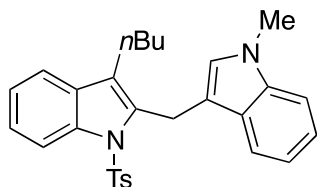

Compound **12a** was isolated as yellow oil (16 mg, 65%).  $^1\text{H}$  NMR (400 MHz,  $\text{CDCl}_3$ , TMS):  $\delta$  8.24 (d,  $J = 8.0$  Hz, 1H), 7.61 (d,  $J = 8.0$  Hz, 1H), 7.48 (d,  $J = 8.0$  Hz, 1H), 7.32-7.24 (m, 4H), 7.20 (d,  $J = 4.0$  Hz, 2H), 7.10 (ddd,  $J = 20.0, 12.0, 4.0$  Hz, 1H), 6.86 (d,  $J = 8.0$  Hz, 2H), 6.34 (s, 1H), 4.51 (s, 2H), 3.51 (s, 3H), 2.69 (t,  $J = 8.0$  Hz, 2H), 2.24 (s, 3H), 1.51 (m, 2H), 1.28 (m, 2H), 0.84 (t,  $J = 8.0$  Hz, 3H).  $^{13}\text{C}$  NMR (100 MHz,  $\text{CDCl}_3$ ):  $\delta$  144.0, 137.3, 137.1, 136.4, 135.6, 130.9, 129.2, 127.74, 127.68, 126.5, 124.3, 123.4, 122.3, 121.7, 119.2, 119.1, 119.0, 115.6, 112.4, 109.2, 32.7, 32.4, 24.4, 22.9, 22.1, 21.7, 14.2. IR (neat)  $\nu$  3675, 2949, 1734, 1678, 1513. HRMS (ESI)  $m/z$  calcd for  $\text{C}_{29}\text{H}_{30}\text{N}_2\text{O}_2\text{S}$  ( $\text{M}+\text{Na}$ ) $^+$  493.1920, found 493.1932.

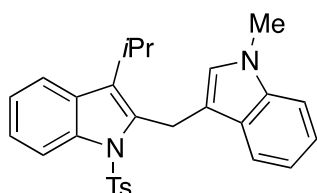

Compound **12b** was isolated as brown oil (38 mg, 83%).  $^1\text{H}$  NMR (400 MHz,  $\text{CDCl}_3$ , TMS):  $\delta$  8.32 (d,  $J = 8.0$  Hz, 1H), 7.67 (q,  $J = 8.0$  Hz, 2H), 7.32-7.21 (m, 6H), 7.15-7.11 (m, 1H), 6.86 (d,  $J = 8.0$  Hz, 2H), 6.18 (s, 1H), 4.54 (s, 2H), 3.49 (s, 3H), 3.22 (m, 1H), 2.25 (s, 3H), 1.36 (s, 3H), 1.34 (s, 3H).  $^{13}\text{C}$  NMR (100 MHz,  $\text{CDCl}_3$ ):  $\delta$  144.0, 137.7, 137.2, 136.5, 134.1, 129.23, 129.17, 127.6, 127.4, 126.9, 126.6, 124.0, 123.0, 121.8, 120.6, 119.2, 119.1, 115.7, 112.8, 109.2, 32.7, 26.3, 22.5, 21.9, 21.7. IR (neat)  $\nu$  2969, 2936, 2875, 1722, 1679, 1612. HRMS (ESI)  $m/z$  calcd for  $\text{C}_{28}\text{H}_{28}\text{N}_2\text{O}_2\text{S}$  ( $\text{M}+\text{Na}$ ) $^+$  479.1764, found 479.1770.

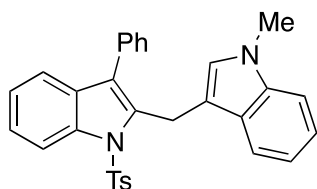

Compound **12c** was isolated as colorless oil (21 mg, 42%).  $^1\text{H}$  NMR (500 MHz,  $\text{CDCl}_3$ , TMS):  $\delta$  8.29 (d,  $J = 10.0$  Hz, 1H), 7.48 (d,  $J = 5.0$  Hz, 2H), 7.44-7.17 (m, 11H), 7.02 (m, 1H), 6.91 (d,  $J = 5.0$  Hz, 2H), 6.46 (s, 1H), 4.55 (s, 2H), 3.52 (s, 3H), 2.28 (s, 3H).  $^{13}\text{C}$

NMR (125 MHz, CDCl<sub>3</sub>):  $\delta$  144.2, 137.2, 137.0, 136.4, 133.4, 130.3, 130.0, 129.3, 128.9, 127.9, 127.8, 127.6, 127.4, 126.5, 124.8, 123.8, 123.7, 121.7, 119.9, 119.3, 119.1, 115.4, 113.0, 109.1, 32.7, 22.7, 21.8. IR (neat)  $\nu$  3764, 2923, 1738, 1711, 1530, 1513. HRMS (ESI)  $m/z$  calcd for C<sub>31</sub>H<sub>26</sub>N<sub>2</sub>O<sub>2</sub>S (M+Na)<sup>+</sup> 513.1607, found 513.1609.

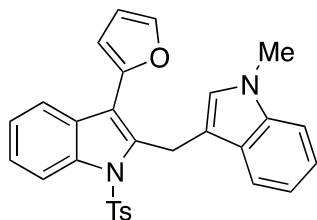

Compound **12d** was isolated as brown oil (29 mg, 60%). <sup>1</sup>H NMR (500 MHz, CDCl<sub>3</sub>, TMS):  $\delta$  8.31 (d,  $J$  = 10.0 Hz, 1H), 7.94 (d,  $J$  = 10.0 Hz, 1H), 7.56-7.53 (m, 2H), 7.38-7.29 (m, 4H), 7.23-7.21 (m, 2H), 7.11-7.08 (m, 1H), 6.87 (d,  $J$  = 10.0 Hz, 2H), 6.48-6.43 (m, 2H), 6.38 (s, 1H), 4.74 (s, 2H), 3.51 (s, 3H), 2.24 (s, 3H). <sup>13</sup>C NMR (125 MHz, CDCl<sub>3</sub>):  $\delta$  148.4, 144.4, 142.3, 137.1, 137.0, 136.9, 136.3, 129.4, 128.3, 127.72, 127.70, 126.6, 125.0, 124.1, 121.8, 120.9, 119.3, 119.2, 115.3, 114.0, 111.7, 111.5, 109.2, 108.8, 32.7, 23.2, 21.7. IR (neat)  $\nu$  3763, 2947, 1739, 1692, 1642, 1550. HRMS (ESI)  $m/z$  calcd for C<sub>31</sub>H<sub>24</sub>N<sub>2</sub>O<sub>2</sub>S (M+Na)<sup>+</sup> 503.1400, found 503.1400.

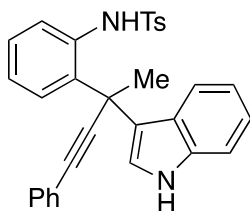

Compound **13** was isolated as white solid (30 mg, 63%). mp=161-163 °C. <sup>1</sup>H NMR (500 MHz, CDCl<sub>3</sub>, TMS):  $\delta$  8.27 (s, 1H), 7.98 (s, 1H), 7.73 (d,  $J$  = 10.0 Hz, 1H), 7.50-7.48 (m, 2H), 7.44 (d,  $J$  = 2.5 Hz, 1H), 7.38-7.36 (m, 2H), 7.32-7.30 (m, 3H), 7.19-7.14 (m, 2H), 7.10-7.06 (m, 3H), 7.03 (d,  $J$  = 5.0 Hz, 1H), 6.88-6.85 (m, 1H), 6.80 (d,  $J$  = 10.0 Hz, 2H), 2.23 (s, 3H), 2.12 (s, 3H). <sup>13</sup>C NMR (125 MHz, CDCl<sub>3</sub>):  $\delta$  143.5, 137.7, 136.4, 132.1, 131.3, 129.5, 128.62, 128.60, 128.55, 127.5, 127.3, 125.0, 123.5, 123.1, 122.8, 122.2, 120.6, 120.1, 120.0, 118.4, 111.9, 92.8, 85.0, 38.1, 29.6, 21.7. IR (neat)  $\nu$  2929, 2820, 1726, 1550. HRMS (ESI)  $m/z$  calcd for C<sub>31</sub>H<sub>26</sub>N<sub>2</sub>O<sub>2</sub>S (M+Na)<sup>+</sup> 513.1607, found 513.1609. X-ray structure (CCDC 1016688).

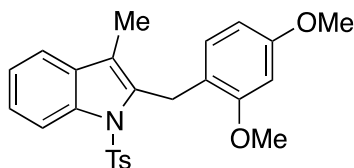

Compound **14** was isolated as colorless oil (14 mg, 64%).  $^1\text{H}$  NMR (400 MHz,  $\text{CDCl}_3$ , TMS):  $\delta$  8.23 (d,  $J = 8.0$  Hz, 1H), 7.47 (d,  $J = 8.0$  Hz, 2H), 7.43 (d,  $J = 8.0$  Hz, 1H), 7.33-7.24 (m, 2H), 7.04 (d,  $J = 8.0$  Hz, 2H), 6.51 (d,  $J = 8.0$  Hz, 1H), 6.46 (d,  $J = 4.0$  Hz, 1H), 6.18 (dd,  $J = 8.0, 4.0$  Hz, 1H), 4.32 (s, 2H), 3.88 (s, 3H), 3.75 (s, 3H), 2.28 (s, 3H), 2.11 (s, 3H).  $^{13}\text{C}$  NMR (125 MHz,  $\text{CDCl}_3$ ):  $\delta$  159.5, 158.0, 144.4, 137.0, 136.4, 134.7, 131.5, 129.7, 129.0, 126.7, 124.4, 123.5, 119.9, 118.7, 115.4, 110.0, 104.0, 98.6, 55.8, 55.6, 25.1, 21.8, 9.2. IR (neat)  $\nu$  3763, 2941, 2839, 1613, 1589, 1505. HRMS (ESI)  $m/z$  calcd for  $\text{C}_{25}\text{H}_{25}\text{NO}_4\text{S}$  ( $\text{M}+\text{Na}$ ) $^+$  458.1397, found 458.1396.

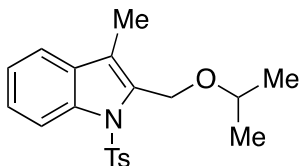

Compound **15** was isolated as colorless oil (17 mg, 48%).  $^1\text{H}$  NMR (400 MHz,  $\text{CDCl}_3$ , TMS):  $\delta$  8.09 (d,  $J = 8.0$  Hz, 1H), 7.88 (d,  $J = 8.0$  Hz, 2H), 7.43 (d,  $J = 8.0$  Hz, 1H), 7.31-7.27 (m, 1H), 7.24-7.20 (m, 1H), 7.15 (d,  $J = 8.0$  Hz, 2H), 4.86 (s, 2H), 3.82 (m, 1H), 2.31 (s, 3H), 2.27 (s, 3H), 1.24 (s, 3H), 1.22 (s, 3H).  $^{13}\text{C}$  NMR (100 MHz,  $\text{CDCl}_3$ ):  $\delta$  144.5, 136.5, 133.4, 130.8, 129.7, 127.4, 125.3, 123.4, 120.3, 119.4, 115.1, 71.8, 60.0, 22.3, 21.8, 9.3. IR (neat)  $\nu$  2941, 2839, 1613, 1589, 1505. HRMS (ESI)  $m/z$  calcd for  $\text{C}_{20}\text{H}_{23}\text{NO}_3\text{S}$  ( $\text{M}+\text{Na}$ ) $^+$  380.1291, found 380.1292.

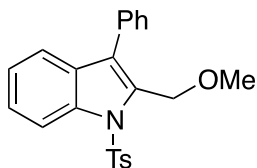

Compound **16** was isolated as colorless oil (24 mg, 62%).  $^1\text{H}$  NMR (500 MHz,  $\text{CDCl}_3$ , TMS):  $\delta$  8.20 (d,  $J = 10.0$  Hz, 1H), 7.96 (d,  $J = 10.0$  Hz, 2H), 7.50-7.45 (m, 5H), 7.42-7.39 (m, 1H), 7.37-7.33 (m, 1H), 7.23-7.19 (m, 3H), 4.73 (s, 2H), 3.36 (s, 3H), 2.33 (s, 3H).  $^{13}\text{C}$  NMR (125 MHz,  $\text{CDCl}_3$ ):  $\delta$  144.8, 136.5, 136.4, 133.1, 132.7, 130.4, 129.8, 129.3, 128.9, 128.1, 127.5, 126.7, 125.7, 123.8, 120.6, 115.1, 64.6, 58.1, 21.8. The spectra of compound **16** are in accordance with literature.<sup>5</sup>

References:

1. Zhang, J.; Zhu, D.; Yu, C.; Wan, C.; Wang, Z.. *Org. Lett.* **2010**, *12*, 2841.
2. Gabriele, B.; Mancuso, R.; Lupinacci, E.; Spina, R.; Salerno, G.; Veltri, L.; Dibenedetto, A. *Tetrahedron* **2009**, *65*, 8507.
3. Clavier, H.; Lepronier, A.; Bengobesse-Mintsa, N.; Gatineau, D.; Pellissier, H.; Giordano, L.; Tenaglia, A.; Buono, G. *Adv. Synth. Catal.* **2013**, *355*, 403.
4. Kothandaraman, P.; Lauw, S. J. L.; Chan, P. W. H. *Tetrahedron*, **2013**, *69*, 7471.
5. Kothandaraman, P.; Rao, W.; Foo, S. J.; Chan, P. W. H. *Angew. Chem. Int. Ed.* **2010**, *49*, 4619.
6. Luo, Y.; Herndon, J. W.; Cervantes-Lee, F. *J. Am. Chem. Soc.* **2003**, *125*, 12720.
7. Ali, S.; Zhu, H.-T.; Xia, X.-F.; Ji, K.-G.; Yang Y.-F.; Song, X.-R.; Liang, Y.-M. *Org. Lett.* **2011**, *13*, 2598.

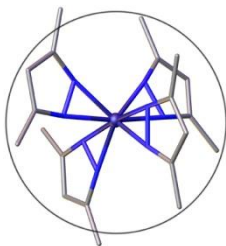

---

MOLECULAR STRUCTURE LABORATORY

---

ILIA A. GUZEI, PH.D.

---

University of Wisconsin-Madison  
2124 Chemistry Department  
1101 University Ave  
Madison, WI 53706

☎ 608-263-4694  
Fax 608-262-0381

E-mail: [iguzei@chem.wisc.edu](mailto:iguzei@chem.wisc.edu)

---

Structural report on **9b**  
(CCDC 1016687)

MAY 22, 2014

## **Crystallographic Experimental Section**

### ***Data Collection***

A colorless crystal with approximate dimensions  $0.56 \times 0.48 \times 0.41 \text{ mm}^3$  was selected under oil under ambient conditions and attached to the tip of a MiTeGen MicroMount©. The crystal was mounted in a stream of cold nitrogen at 100(1) K and centered in the X-ray beam by using a video camera.

The crystal evaluation and data collection were performed on a Bruker Quazar SMART APEXII diffractometer with Mo  $K_{\alpha}$  ( $\lambda = 0.71073 \text{ \AA}$ ) radiation and the diffractometer to crystal distance of 4.96 cm.

The initial cell constants were obtained from three series of  $\omega$  scans at different starting angles. Each series consisted of 12 frames collected at intervals of  $0.5^{\circ}$  in a  $6^{\circ}$  range about  $\omega$  with the exposure time of 2 seconds per frame. The reflections were successfully indexed by an automated indexing routine built in the APEXII program suite. The final cell constants were calculated from a set of 9673 strong reflections from the actual data collection.

The data were collected by using the full sphere data collection routine to survey the reciprocal space to the extent of a full sphere to a resolution of  $0.70 \text{ \AA}$ . A total of 48251 data were harvested by collecting 6 sets of frames with  $0.5^{\circ}$  scans in  $\omega$  and  $\varphi$  with exposure times of 20 sec per frame. These highly redundant datasets were corrected for Lorentz and polarization effects. The absorption correction was based on fitting a function to the empirical transmission surface as sampled by multiple equivalent measurements. [1]

### **Structure Solution and Refinement**

The systematic absences in the diffraction data were uniquely consistent for

the space group  $P2_1/n$  that yielded chemically reasonable and computationally stable results of refinement [2-4].

A successful solution by the direct methods provided most non-hydrogen atoms from the  $E$ -map. The remaining non-hydrogen atoms were located in an alternating series of least-squares cycles and difference Fourier maps. All non-hydrogen atoms were refined with anisotropic displacement coefficients. All hydrogen atoms except H2(N2) were included in the structure factor calculation at idealized positions and were allowed to ride on the neighboring atoms with relative isotropic displacement coefficients. The H2 atom was located in the difference Fourier map and refined independently

The final least-squares refinement of 277 parameters against 4971 data resulted in residuals  $R$  (based on  $F^2$  for  $I \geq 2\sigma$ ) and  $wR$  (based on  $F^2$  for all data) of 0.0370 and 0.1014, respectively. The final difference Fourier map was featureless.

## Summary

**Crystal Data** for  $C_{25}H_{22}N_2O_2S$  ( $M=414.50$ ): monoclinic, space group  $P2_1/n$  (no. 14),  $a = 13.247(3)$  Å,  $b = 11.312(3)$  Å,  $c = 14.218(4)$  Å,  $\beta = 109.780(16)^\circ$ ,  $V = 2005.0(9)$  Å<sup>3</sup>,  $Z = 4$ ,  $T = 100.01$  K,  $\mu(\text{MoK}\alpha) = 0.187$  mm<sup>-1</sup>,  $D_{\text{calc}} = 1.373$  g/mm<sup>3</sup>, 48251 reflections measured ( $3.634 \leq 2\theta \leq 56.666$ ), 4971 unique ( $R_{\text{int}} = 0.0212$ ,  $R_{\text{sigma}} = 0.0096$ ) which were used in all calculations. The final  $R_1$  was 0.0370 ( $I > 2\sigma(I)$ ) and  $wR_2$  was 0.1014 (all data).

## References

- [1] Bruker-AXS. (2007-2014) APEX2 (Ver. 2014.1-1), SADABS (2012-1), and SAINT+ (Ver. 8.32A) Software Reference Manuals. Bruker-AXS, Madison, Wisconsin, USA.
- [2] Sheldrick, G. M. (2008) SHELXL. *Acta Cryst.* **A64**, 112-122.



- [3] Dolomanov, O.V.; Bourhis, L.J.; Gildea, R.J.; Howard, J.A.K.; Puschmann, H. "OLEX2: a complete structure solution, refinement and analysis program". *J. Appl. Cryst.* (2009) **42**, 339-341.
- [4] Guzei, I.A. (2013). Internal laboratory computer programs Gn.

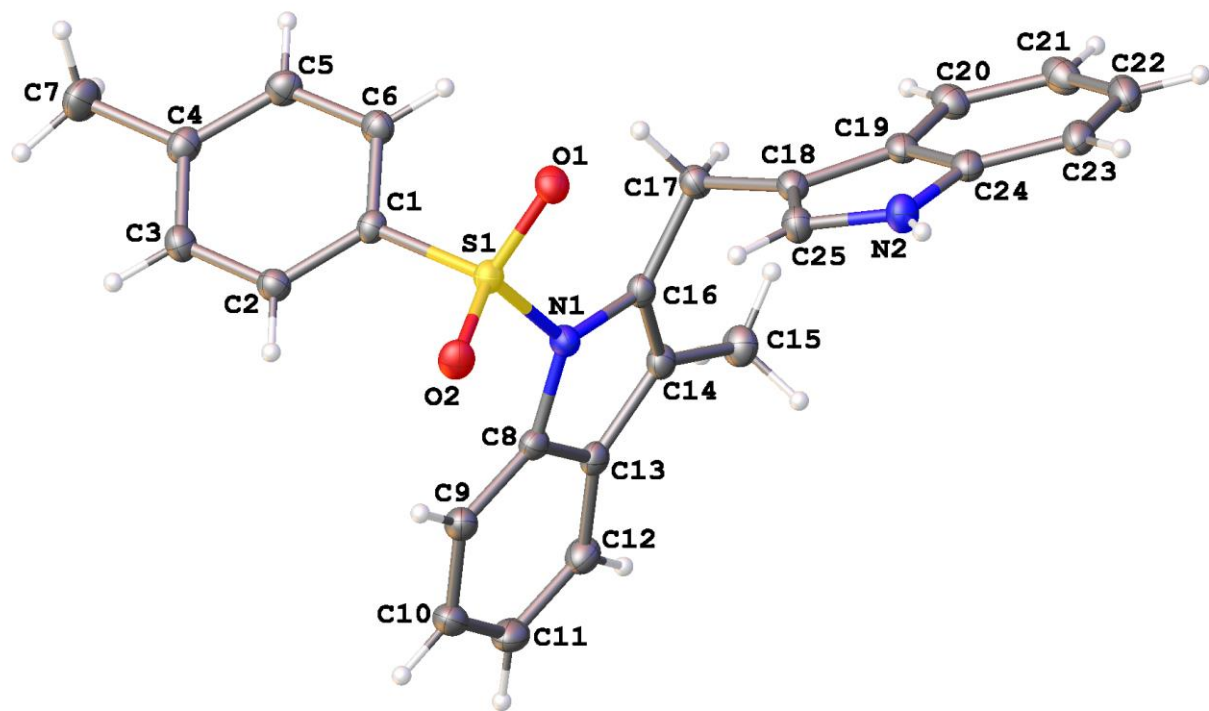

Figure 1. A molecular drawing of **9b** shown with 50% probability ellipsoids.

**Table 1 Crystal data and structure refinement for 9b.**

|                                             |                                                                 |
|---------------------------------------------|-----------------------------------------------------------------|
| Identification code                         | <b>9b</b>                                                       |
| Empirical formula                           | C <sub>25</sub> H <sub>22</sub> N <sub>2</sub> O <sub>2</sub> S |
| Formula weight                              | 414.50                                                          |
| Temperature/K                               | 100.01                                                          |
| Crystal system                              | monoclinic                                                      |
| Space group                                 | P2 <sub>1</sub> /n                                              |
| a/Å                                         | 13.247(3)                                                       |
| b/Å                                         | 11.312(3)                                                       |
| c/Å                                         | 14.218(4)                                                       |
| α/°                                         | 90                                                              |
| β/°                                         | 109.780(16)                                                     |
| γ/°                                         | 90                                                              |
| Volume/Å <sup>3</sup>                       | 2005.0(9)                                                       |
| Z                                           | 4                                                               |
| ρ <sub>calc</sub> /mg/mm <sup>3</sup>       | 1.373                                                           |
| m/mm <sup>-1</sup>                          | 0.187                                                           |
| F(000)                                      | 872.0                                                           |
| Crystal size/mm <sup>3</sup>                | 0.56 × 0.48 × 0.41                                              |
| Radiation                                   | MoKα (λ = 0.71073)                                              |
| 2θ range for data collection                | 3.634 to 56.666°                                                |
| Index ranges                                | -17 ≤ h ≤ 17, -15 ≤ k ≤ 15, -18 ≤ l ≤ 18                        |
| Reflections collected                       | 48251                                                           |
| Independent reflections                     | 4971 [R <sub>int</sub> = 0.0212, R <sub>sigma</sub> = 0.0096]   |
| Data/restraints/parameters                  | 4971/0/277                                                      |
| Goodness-of-fit on F <sup>2</sup>           | 1.046                                                           |
| Final R indexes [I >= 2σ (I)]               | R <sub>1</sub> = 0.0370, wR <sub>2</sub> = 0.1000               |
| Final R indexes [all data]                  | R <sub>1</sub> = 0.0384, wR <sub>2</sub> = 0.1014               |
| Largest diff. peak/hole / e Å <sup>-3</sup> | 0.42/-0.37                                                      |

**Table 2 Fractional Atomic Coordinates (×10<sup>4</sup>) and Equivalent Isotropic Displacement Parameters (Å<sup>2</sup>×10<sup>3</sup>) for 9b. U<sub>eq</sub> is defined as 1/3 of of the trace**

**of the orthogonalised  $U_{ij}$  tensor.**

| <b>Atom</b> | <b>x</b>    | <b>y</b>    | <b>z</b>    | <b>U(eq)</b> |
|-------------|-------------|-------------|-------------|--------------|
| S1          | 5203.5 (2)  | 2906.9 (2)  | 7821.4 (2)  | 16.03 (9)    |
| O1          | 4426.5 (7)  | 3399.6 (8)  | 8208.3 (6)  | 20.49 (18)   |
| O2          | 6123.7 (7)  | 2323.2 (8)  | 8489.8 (6)  | 21.52 (19)   |
| N1          | 5672.5 (8)  | 4022.4 (9)  | 7323.6 (7)  | 17.15 (19)   |
| N2          | 4941.6 (9)  | 6834.2 (10) | 9582.1 (8)  | 21.0 (2)     |
| C1          | 4542.4 (9)  | 1943.3 (10) | 6846.3 (8)  | 15.6 (2)     |
| C2          | 5069.0 (9)  | 930.1 (11)  | 6711.4 (9)  | 18.5 (2)     |
| C3          | 4529 (1)    | 153.3 (11)  | 5951.7 (9)  | 20.7 (2)     |
| C4          | 3481 (1)    | 380.1 (11)  | 5329.1 (9)  | 20.3 (2)     |
| C5          | 2970.8 (10) | 1407.1 (11) | 5486.5 (9)  | 20.8 (2)     |
| C6          | 3488.6 (9)  | 2187.9 (10) | 6246.2 (9)  | 18.7 (2)     |
| C7          | 2898.2 (11) | -481.8 (13) | 4521.2 (11) | 29.8 (3)     |
| C8          | 6562.0 (9)  | 3887.2 (10) | 6989.1 (9)  | 17.8 (2)     |
| C9          | 7359.5 (10) | 3023.6 (11) | 7206.9 (10) | 21.9 (2)     |
| C10         | 8149.9 (10) | 3154.1 (12) | 6770.9 (11) | 25.6 (3)     |
| C11         | 8145.1 (10) | 4106.2 (13) | 6143.7 (11) | 26.7 (3)     |
| C12         | 7347.8 (10) | 4959.2 (12) | 5930.9 (10) | 23.5 (3)     |
| C13         | 6544.0 (9)  | 4846.2 (10) | 6358.4 (9)  | 18.4 (2)     |
| C14         | 5618.7 (9)  | 5564.8 (10) | 6283.4 (8)  | 18.0 (2)     |
| C15         | 5332.3 (11) | 6691.0 (11) | 5700.7 (10) | 23.5 (2)     |
| C16         | 5092.3 (9)  | 5054.7 (10) | 6847.5 (8)  | 16.9 (2)     |
| C17         | 4114.4 (9)  | 5513.7 (11) | 7031.2 (9)  | 18.4 (2)     |
| C18         | 4345.8 (9)  | 6235.3 (10) | 7974.0 (9)  | 17.8 (2)     |
| C19         | 3989.4 (9)  | 7426.2 (11) | 8024.3 (9)  | 18.0 (2)     |
| C20         | 3392.2 (10) | 8242.7 (11) | 7312 (1)    | 21.7 (2)     |
| C21         | 3204.6 (11) | 9355.7 (12) | 7622.9 (10) | 24.8 (3)     |
| C22         | 3585.4 (10) | 9663.8 (11) | 8640.2 (10) | 25.0 (3)     |
| C23         | 4162.8 (10) | 8875.9 (11) | 9365 (1)    | 21.8 (2)     |
| C24         | 4368.4 (9)  | 7764.8 (11) | 9043.6 (9)  | 18.7 (2)     |
| C25         | 4920.2 (10) | 5917.3 (11) | 8936.3 (9)  | 20.1 (2)     |

**Table 3 Anisotropic Displacement Parameters ( $\text{\AA}^2 \times 10^3$ ) for 9b. The Anisotropic displacement factor exponent takes the form:  $-2\pi^2[h^2a^*2U_{11}+2hka^*b^*U_{12}+\dots]$ .**

| <b>Atom</b> | <b>U<sub>11</sub></b> | <b>U<sub>22</sub></b> | <b>U<sub>33</sub></b> | <b>U<sub>23</sub></b> | <b>U<sub>13</sub></b> | <b>U<sub>12</sub></b> |
|-------------|-----------------------|-----------------------|-----------------------|-----------------------|-----------------------|-----------------------|
|-------------|-----------------------|-----------------------|-----------------------|-----------------------|-----------------------|-----------------------|

|     |            |            |            |           |           |           |
|-----|------------|------------|------------|-----------|-----------|-----------|
| S1  | 18.20 (15) | 15.47 (14) | 13.91 (14) | -0.78 (9) | 4.77 (10) | -0.36 (9) |
| O1  | 24.3 (4)   | 20.4 (4)   | 19.2 (4)   | -1.8 (3)  | 10.5 (3)  | -0.3 (3)  |
| O2  | 22.6 (4)   | 21.6 (4)   | 16.4 (4)   | 0.7 (3)   | 1.3 (3)   | 0.9 (3)   |
| N1  | 17.3 (4)   | 15.0 (4)   | 20.1 (5)   | -0.2 (4)  | 7.6 (4)   | 0.5 (3)   |
| N2  | 24.8 (5)   | 19.3 (5)   | 18.9 (5)   | -2.3 (4)  | 7.4 (4)   | 0.0 (4)   |
| C1  | 18.3 (5)   | 14.8 (5)   | 13.5 (5)   | -0.5 (4)  | 5.1 (4)   | -1.8 (4)  |
| C2  | 17.5 (5)   | 18.9 (5)   | 18.6 (5)   | 0.1 (4)   | 5.6 (4)   | 1.1 (4)   |
| C3  | 22.6 (6)   | 18.6 (5)   | 21.9 (6)   | -3.3 (4)  | 8.8 (5)   | 0.9 (4)   |
| C4  | 22.5 (6)   | 21.2 (6)   | 17.4 (5)   | -2.4 (4)  | 6.8 (4)   | -3.5 (4)  |
| C5  | 18.9 (5)   | 22.2 (6)   | 18.5 (5)   | 1.0 (4)   | 2.6 (4)   | -0.1 (4)  |
| C6  | 19.2 (5)   | 16.6 (5)   | 19.3 (5)   | 1.1 (4)   | 5.4 (4)   | 1.4 (4)   |
| C7  | 27.3 (6)   | 31.0 (7)   | 27.3 (6)   | -11.4 (5) | 4.5 (5)   | -4.2 (5)  |
| C8  | 16.0 (5)   | 18.1 (5)   | 19.1 (5)   | -4.9 (4)  | 5.7 (4)   | -2.5 (4)  |
| C9  | 18.1 (5)   | 19.4 (5)   | 27.3 (6)   | -3.0 (5)  | 6.7 (5)   | -0.2 (4)  |
| C10 | 17.8 (5)   | 24.7 (6)   | 34.5 (7)   | -7.0 (5)  | 9.0 (5)   | 0.4 (5)   |
| C11 | 21.7 (6)   | 28.8 (7)   | 33.9 (7)   | -8.2 (5)  | 15.0 (5)  | -5.0 (5)  |
| C12 | 24.7 (6)   | 22.7 (6)   | 26.2 (6)   | -4.7 (5)  | 12.5 (5)  | -5.6 (5)  |
| C13 | 19.2 (5)   | 17.0 (5)   | 19.0 (5)   | -5.5 (4)  | 6.5 (4)   | -2.9 (4)  |
| C14 | 20.5 (5)   | 16.1 (5)   | 17.3 (5)   | -3.3 (4)  | 6.5 (4)   | -1.1 (4)  |
| C15 | 28.2 (6)   | 19.3 (6)   | 23.4 (6)   | 2.0 (5)   | 9.5 (5)   | -0.1 (5)  |
| C16 | 18.3 (5)   | 14.8 (5)   | 16.6 (5)   | -2.4 (4)  | 4.6 (4)   | 0.1 (4)   |
| C17 | 18.6 (5)   | 17.5 (5)   | 19.1 (5)   | -0.9 (4)  | 6.5 (4)   | 1.4 (4)   |
| C18 | 17.6 (5)   | 17.2 (5)   | 20.6 (5)   | -1.3 (4)  | 8.9 (4)   | 0.0 (4)   |
| C19 | 17.0 (5)   | 17.9 (5)   | 22.1 (5)   | -0.5 (4)  | 10.6 (4)  | -0.7 (4)  |
| C20 | 22.3 (5)   | 22.7 (6)   | 23.5 (6)   | 2.5 (5)   | 12.2 (5)  | 2.5 (5)   |
| C21 | 26.2 (6)   | 21.5 (6)   | 31.1 (6)   | 6.3 (5)   | 15.2 (5)  | 5.0 (5)   |
| C22 | 26.0 (6)   | 18.1 (6)   | 35.8 (7)   | -2.3 (5)  | 17.0 (5)  | 0.1 (5)   |
| C23 | 22.6 (5)   | 19.7 (6)   | 26.8 (6)   | -5.0 (5)  | 12.9 (5)  | -3.1 (4)  |
| C24 | 18.1 (5)   | 18.2 (5)   | 22.3 (6)   | -1.1 (4)  | 10.2 (4)  | -1.3 (4)  |
| C25 | 21.9 (5)   | 17.2 (5)   | 21.3 (6)   | -2.4 (4)  | 7.5 (4)   | 0.5 (4)   |

**Table 4 Bond Lengths for 9b.**

| Atom | Atom | Length/Å    | Atom | Atom | Length/Å    |
|------|------|-------------|------|------|-------------|
| S1   | O1   | 1.4339 (9)  | C9   | C10  | 1.3935 (18) |
| S1   | O2   | 1.4287 (9)  | C10  | C11  | 1.397 (2)   |
| S1   | N1   | 1.6664 (11) | C11  | C12  | 1.3863 (19) |

|    |     |             |     |     |             |
|----|-----|-------------|-----|-----|-------------|
| S1 | C1  | 1.7480 (12) | C12 | C13 | 1.3992 (17) |
| N1 | C8  | 1.4204 (15) | C13 | C14 | 1.4444 (16) |
| N1 | C16 | 1.4354 (15) | C14 | C15 | 1.4969 (17) |
| N2 | C24 | 1.3703 (16) | C14 | C16 | 1.3569 (16) |
| N2 | C25 | 1.3793 (16) | C16 | C17 | 1.4984 (16) |
| C1 | C2  | 1.3885 (16) | C17 | C18 | 1.5096 (16) |
| C1 | C6  | 1.3954 (16) | C18 | C19 | 1.4373 (16) |
| C2 | C3  | 1.3884 (17) | C18 | C25 | 1.3696 (17) |
| C3 | C4  | 1.3947 (17) | C19 | C20 | 1.4009 (17) |
| C4 | C5  | 1.3997 (18) | C19 | C24 | 1.4165 (17) |
| C4 | C7  | 1.5054 (17) | C20 | C21 | 1.3846 (18) |
| C5 | C6  | 1.3842 (17) | C21 | C22 | 1.405 (2)   |
| C8 | C9  | 1.3947 (17) | C22 | C23 | 1.3814 (19) |
| C8 | C13 | 1.4026 (17) | C23 | C24 | 1.3954 (17) |

**Table 5 Bond Angles for 9b.**

| Atom | Atom | Atom | Angle/°     | Atom | Atom | Atom | Angle/°     |
|------|------|------|-------------|------|------|------|-------------|
| O1   | S1   | N1   | 106.72 (5)  | C11  | C12  | C13  | 118.50 (12) |
| O1   | S1   | C1   | 108.34 (6)  | C8   | C13  | C14  | 108.24 (10) |
| O2   | S1   | O1   | 119.08 (6)  | C12  | C13  | C8   | 119.84 (11) |
| O2   | S1   | N1   | 106.01 (6)  | C12  | C13  | C14  | 131.92 (12) |
| O2   | S1   | C1   | 108.97 (6)  | C13  | C14  | C15  | 124.73 (11) |
| N1   | S1   | C1   | 107.11 (5)  | C16  | C14  | C13  | 108.06 (11) |
| C8   | N1   | S1   | 122.10 (8)  | C16  | C14  | C15  | 127.18 (11) |
| C8   | N1   | C16  | 107.59 (9)  | N1   | C16  | C17  | 123.79 (10) |
| C16  | N1   | S1   | 126.82 (8)  | C14  | C16  | N1   | 108.94 (10) |
| C24  | N2   | C25  | 108.85 (11) | C14  | C16  | C17  | 127.10 (11) |
| C2   | C1   | S1   | 118.95 (9)  | C16  | C17  | C18  | 114.48 (10) |
| C2   | C1   | C6   | 121.65 (11) | C19  | C18  | C17  | 125.42 (11) |
| C6   | C1   | S1   | 119.36 (9)  | C25  | C18  | C17  | 128.48 (11) |
| C3   | C2   | C1   | 118.64 (11) | C25  | C18  | C19  | 106.10 (10) |
| C2   | C3   | C4   | 121.16 (11) | C20  | C19  | C18  | 134.16 (12) |
| C3   | C4   | C5   | 118.82 (11) | C20  | C19  | C24  | 118.64 (11) |
| C3   | C4   | C7   | 120.56 (12) | C24  | C19  | C18  | 107.20 (10) |
| C5   | C4   | C7   | 120.59 (11) | C21  | C20  | C19  | 119.16 (12) |
| C6   | C5   | C4   | 121.05 (11) | C20  | C21  | C22  | 120.91 (12) |

|     |     |     |            |     |     |     |            |
|-----|-----|-----|------------|-----|-----|-----|------------|
| C5  | C6  | C1  | 118.66(11) | C23 | C22 | C21 | 121.54(12) |
| C9  | C8  | N1  | 130.77(11) | C22 | C23 | C24 | 117.20(12) |
| C9  | C8  | C13 | 122.11(11) | N2  | C24 | C19 | 107.55(10) |
| C13 | C8  | N1  | 107.11(10) | N2  | C24 | C23 | 129.91(12) |
| C10 | C9  | C8  | 116.99(12) | C23 | C24 | C19 | 122.53(11) |
| C9  | C10 | C11 | 121.59(12) | C18 | C25 | N2  | 110.29(11) |
| C12 | C11 | C10 | 120.97(12) |     |     |     |            |

**Table 6 Hydrogen Bonds for 9b.**

| D H A                 | d(D-H)/Å  | d(H-A)/Å  | d(D-A)/Å   | D-H-A/°   |
|-----------------------|-----------|-----------|------------|-----------|
| N2 H2 O1 <sup>1</sup> | 0.877(18) | 2.123(19) | 2.9766(16) | 164.2(16) |

<sup>1</sup>1-X,1-Y,2-Z

**Table 7 Torsion Angles for 9b.**

| A B C D       | Angle/°    | A B C D         | Angle/°    |
|---------------|------------|-----------------|------------|
| S1 N1 C8 C9   | -18.46(17) | C9 C10 C11 C12  | -0.1(2)    |
| S1 N1 C8 C13  | 162.66(8)  | C10 C11 C12 C13 | -0.05(19)  |
| S1 N1 C16 C14 | -161.64(9) | C11 C12 C13 C8  | 0.25(18)   |
| S1 N1 C16 C17 | 22.74(16)  | C11 C12 C13 C14 | -          |
|               |            |                 | 179.65(12) |
| S1 C1 C2 C3   | 178.36(9)  | C12 C13 C14 C15 | -1.9(2)    |
| S1 C1 C6 C5   | -179.06(9) | C12 C13 C14 C16 | 179.71(12) |
| O1 S1 N1 C8   | 171.33(9)  | C13 C8 C9 C10   | 0.21(18)   |
| O1 S1 N1 C16  | -32.44(11) | C13 C14 C16 N1  | 1.73(13)   |
| O1 S1 C1 C2   | -145.08(9) | C13 C14 C16 C17 | 177.17(11) |
| O1 S1 C1 C6   | 32.69(11)  | C14 C16 C17 C18 | -94.30(14) |
| O2 S1 N1 C8   | 43.43(10)  | C15 C14 C16 N1  | -          |
|               |            |                 | 176.62(11) |
| O2 S1 N1 C16  | -160.33(9) | C15 C14 C16 C17 | -1.2(2)    |
| O2 S1 C1 C2   | -14.13(11) | C16 N1 C8 C9    | -          |
|               |            |                 | 178.67(12) |
| O2 S1 C1 C6   | 163.64(9)  | C16 N1 C8 C13   | 2.44(12)   |
| N1 S1 C1 C2   | 100.13(10) | C16 C17 C18 C19 | 123.67(12) |
| N1 S1 C1 C6   | -82.10(10) | C16 C17 C18 C25 | -56.27(17) |

|                |             |                 |             |
|----------------|-------------|-----------------|-------------|
| N1 C8 C9 C10   | 178.53 (12) | C17 C18 C19 C20 | -0.9 (2)    |
| N1 C8 C13 C12  | 178.66 (10) | C17 C18 C19 C24 | 179.35 (11) |
| N1 C8 C13 C14  | -1.42 (12)  | C17 C18 C25 N2  | 179.92 (11) |
| N1 C16 C17 C18 | 80.51 (14)  | C18 C19 C20 C21 | 178.79 (12) |
| C1 S1 N1 C8    | -72.81 (10) | C18 C19 C24 N2  | 1.01 (13)   |
| C1 S1 N1 C16   | 83.42 (11)  | C18 C19 C24 C23 | 179.74 (11) |
| C1 C2 C3 C4    | 0.32 (18)   | C19 C18 C25 N2  | 0.13 (14)   |
| C2 C1 C6 C5    | -1.35 (18)  | C19 C20 C21 C22 | -1.32 (19)  |
| C2 C3 C4 C5    | -0.55 (18)  | C20 C19 C24 N2  | 178.77 (10) |
| C2 C3 C4 C7    | 178.82 (12) | C20 C19 C24 C23 | 0.49 (17)   |
| C3 C4 C5 C6    | -0.19 (19)  | C20 C21 C22 C23 | 0.3 (2)     |
| C4 C5 C6 C1    | 1.11 (18)   | C21 C22 C23 C24 | 1.02 (18)   |
| C6 C1 C2 C3    | 0.64 (18)   | C22 C23 C24 N2  | 177.63 (12) |
| C7 C4 C5 C6    | 178.08 (12) | C22 C23 C24 C19 | -1.44 (18)  |
| C8 N1 C16 C14  | -2.63 (13)  | C24 N2 C25 C18  | 0.51 (14)   |
| C8 N1 C16 C17  | 178.24 (10) | C24 C19 C20 C21 | 0.91 (17)   |
| C8 C9 C10 C11  | -0.01 (19)  | C25 N2 C24 C19  | -0.94 (13)  |
| C8 C13 C14 C15 | 178.20 (11) | C25 N2 C24 C23  | 179.88 (12) |
| C8 C13 C14 C16 | -0.20 (13)  | C25 C18 C19 C20 | 179.03 (13) |
| C9 C8 C13 C12  | -0.34 (18)  | C25 C18 C19 C24 | -0.69 (13)  |
| C9 C8 C13 C14  | 179.58 (11) |                 |             |

**Table 8 Hydrogen Atom Coordinates ( $\text{\AA}\times 10^4$ ) and Isotropic Displacement Parameters ( $\text{\AA}^2\times 10^3$ ) for 9b.**

| Atom | <i>x</i>  | <i>y</i>  | <i>z</i>   | U(eq)  |
|------|-----------|-----------|------------|--------|
| H2   | 5253 (14) | 6801 (16) | 10233 (14) | 30 (4) |
| H2A  | 5784      | 772       | 7130       | 22     |
| H3   | 4880      | -545      | 5854       | 25     |
| H5   | 2258      | 1571      | 5065       | 25     |
| H6   | 3134      | 2876      | 6357       | 22     |



|      |      |       |       |    |
|------|------|-------|-------|----|
| H7A  | 3389 | -1116 | 4488  | 45 |
| H7B  | 2636 | -70   | 3877  | 45 |
| H7C  | 2290 | -821  | 4673  | 45 |
| H9   | 7364 | 2376  | 7633  | 26 |
| H10  | 8706 | 2582  | 6903  | 31 |
| H11  | 8696 | 4170  | 5859  | 32 |
| H12  | 7347 | 5606  | 5504  | 28 |
| H15A | 5893 | 7281  | 5990  | 35 |
| H15B | 4647 | 6986  | 5727  | 35 |
| H15C | 5269 | 6543  | 5004  | 35 |
| H17A | 3657 | 4835  | 7065  | 22 |
| H17B | 3701 | 6007  | 6455  | 22 |
| H20  | 3119 | 8035  | 6624  | 26 |
| H21  | 2813 | 9919  | 7142  | 30 |
| H22  | 3442 | 10432 | 8834  | 30 |
| H23  | 4410 | 9082  | 10053 | 26 |
| H25  | 5256 | 5172  | 9131  | 24 |



---

MOLECULAR STRUCTURE LABORATORY

---

ILIA A. GUZEI, PH.D.

---

University of Wisconsin-Madison  
2124 Chemistry Department

☎ 608-263-4694  
Fax 608-262-0381

1101 University Ave  
Madison, WI 53706

E-mail: [iguzei@chem.wisc.edu](mailto:iguzei@chem.wisc.edu)

---

Structural report on **13**

(CCDC 1016688)

MAY 22, 2014

## Crystallographic Experimental Section

### *Data Collection*

A colorless crystal with approximate dimensions  $0.56 \times 0.47 \times 0.44 \text{ mm}^3$  was selected under oil under ambient conditions and attached to the tip of a MiTeGen MicroMount©. The crystal was mounted in a stream of cold nitrogen at 100(1) K and centered in the X-ray beam by using a video camera.

The crystal evaluation and data collection were performed on a Bruker SMART APEXII diffractometer with Cu K $\alpha$  ( $\lambda = 1.54178 \text{ \AA}$ ) radiation and the diffractometer to crystal distance of 4.03 cm.

The initial cell constants were obtained from three series of  $\omega$  scans at different starting angles. Each series consisted of 35 frames collected at intervals of  $0.6^\circ$  in a  $25^\circ$  range about  $\omega$  with the exposure time of 2 seconds per frame. The reflections were successfully indexed by an automated indexing routine built in the APEXII program. The final cell constants were calculated from a set of 9384 strong reflections from the actual data collection.

The data were collected by using the full sphere data collection routine to survey the reciprocal space to the extent of a full sphere to a resolution of  $0.82 \text{ \AA}$ . A total of 46397 data were harvested by collecting 22 sets of frames with  $0.7^\circ$  scans in  $\omega$  and  $\varphi$  with an exposure time 5-10 sec per frame. These highly redundant datasets were corrected for Lorentz and polarization effects. The absorption correction was based on fitting a function to the empirical transmission surface as sampled by multiple equivalent measurements. [1]

### **Structure Solution and Refinement**

The systematic absences in the diffraction data were uniquely consistent for the space group  $P2_1/c$  that yielded chemically reasonable and computationally stable

results of refinement [2-4].

A successful solution by the direct methods provided most non-hydrogen atoms from the *E*-map. The remaining non-hydrogen atoms were located in an alternating series of least-squares cycles and difference Fourier maps. All non-hydrogen atoms were refined with anisotropic displacement coefficients. All hydrogen atoms except H1(N1) and H2(N2) were included in the structure factor calculation at idealized positions and were allowed to ride on the neighboring atoms with relative isotropic displacement coefficients. Atoms H1 and H2 were located in the difference Fourier map and refined independently

The final least-squares refinement of 333 parameters against 4996 data resulted in residuals *R* (based on  $F^2$  for  $I \geq 2\sigma$ ) and *wR* (based on  $F^2$  for all data) of 0.0348 and 0.0893, respectively. The final difference Fourier map was featureless.

## Summary

**Crystal Data** for  $C_{31}H_{26}N_2O_2S$  ( $M=490.60$ ): monoclinic, space group  $P2_1/c$  (no. 14),  $a = 14.1262(11)$  Å,  $b = 9.3818(5)$  Å,  $c = 20.2526(8)$  Å,  $\beta = 108.247(5)^\circ$ ,  $V = 2549.1(3)$  Å<sup>3</sup>,  $Z = 4$ ,  $T = 99.98$  K,  $\mu(\text{CuK}\alpha) = 1.370$  mm<sup>-1</sup>,  $D_{\text{calc}} = 1.278$  g/mm<sup>3</sup>, 46397 reflections measured ( $6.588 \leq 2\theta \leq 145.99$ ), 4996 unique ( $R_{\text{int}} = 0.0173$ ,  $R_{\text{sigma}} = 0.0083$ ) which were used in all calculations. The final  $R_1$  was 0.0348 ( $I > 2\sigma(I)$ ) and  $wR_2$  was 0.0893 (all data).

## References

- [1] Bruker-AXS. (2007-2014) APEX2 (Ver. 2014.1-1), SADABS (2012-1), and SAINT+ (Ver. 8.32A) Software Reference Manuals. Bruker-AXS, Madison, Wisconsin, USA.
- [2] Sheldrick, G. M. (2008) SHELXL. *Acta Cryst.* **A64**, 112-122.

- [3] Dolomanov, O.V.; Bourhis, L.J.; Gildea, R.J.; Howard, J.A.K.; Puschmann, H. "OLEX2: a complete structure solution, refinement and analysis program". *J. Appl. Cryst.* (2009) **42**, 339-341.
- [4] Guzei, I.A. (2013). Internal laboratory computer programs Gn.

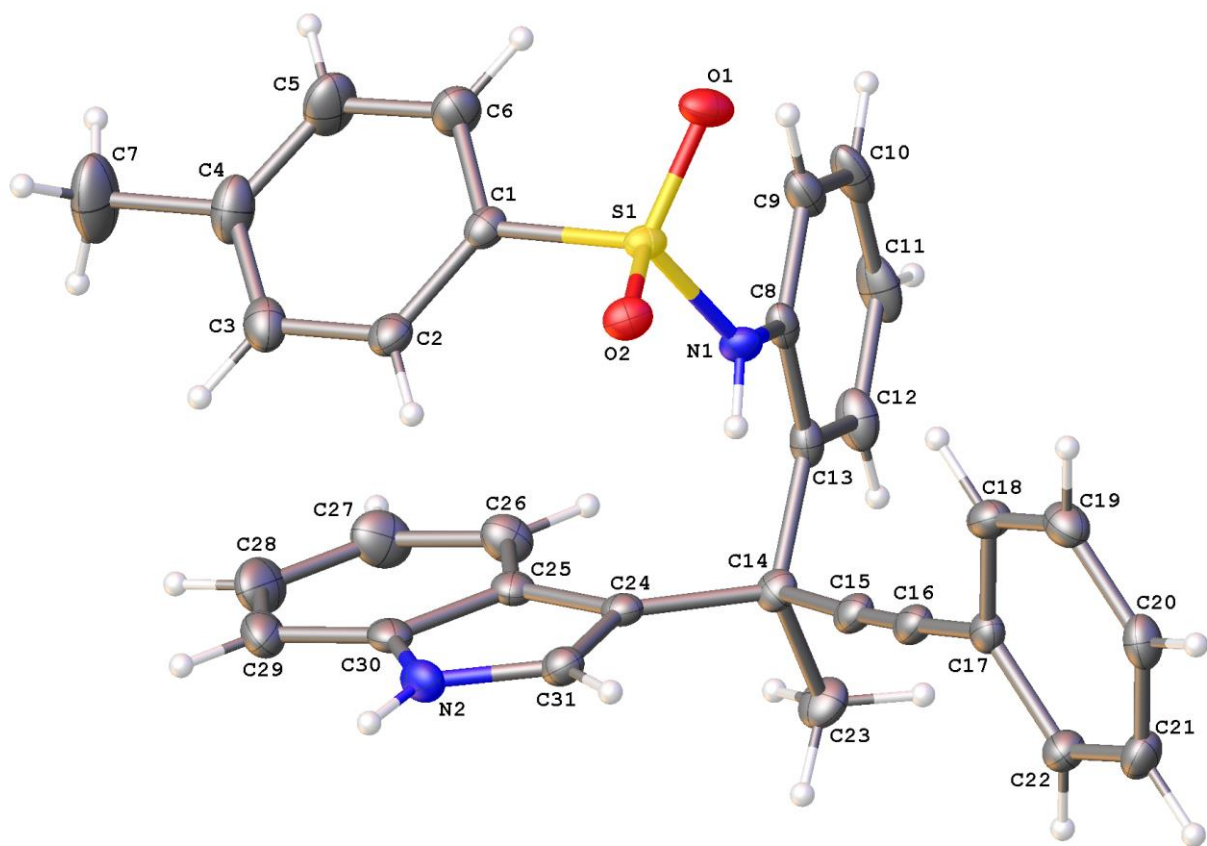

Figure 1. A molecular drawing of **13** shown with 50% probability ellipsoids.

**Table 1 Crystal data and structure refinement for 13.**

|                                             |                                                                 |
|---------------------------------------------|-----------------------------------------------------------------|
| Identification code                         | <b>13</b>                                                       |
| Empirical formula                           | C <sub>31</sub> H <sub>26</sub> N <sub>2</sub> O <sub>2</sub> S |
| Formula weight                              | 490.60                                                          |
| Temperature/K                               | 99.98                                                           |
| Crystal system                              | monoclinic                                                      |
| Space group                                 | P2 <sub>1</sub> /c                                              |
| a/Å                                         | 14.1262(11)                                                     |
| b/Å                                         | 9.3818(5)                                                       |
| c/Å                                         | 20.2526(8)                                                      |
| α/°                                         | 90                                                              |
| β/°                                         | 108.247(5)                                                      |
| γ/°                                         | 90                                                              |
| Volume/Å <sup>3</sup>                       | 2549.1(3)                                                       |
| Z                                           | 4                                                               |
| ρ <sub>calc</sub> /mg/mm <sup>3</sup>       | 1.278                                                           |
| m/mm <sup>-1</sup>                          | 1.370                                                           |
| F(000)                                      | 1032.0                                                          |
| Crystal size/mm <sup>3</sup>                | 0.56 × 0.47 × 0.44                                              |
| Radiation                                   | CuKα (λ = 1.54178)                                              |
| 2θ range for data collection                | 6.588 to 145.99°                                                |
| Index ranges                                | -17 ≤ h ≤ 16, -11 ≤ k ≤ 11, -25 ≤ l ≤ 25                        |
| Reflections collected                       | 46397                                                           |
| Independent reflections                     | 4996 [R <sub>int</sub> = 0.0173, R <sub>sigma</sub> = 0.0083]   |
| Data/restraints/parameters                  | 4996/0/333                                                      |
| Goodness-of-fit on F <sup>2</sup>           | 1.055                                                           |
| Final R indexes [I >= 2σ (I)]               | R <sub>1</sub> = 0.0348, wR <sub>2</sub> = 0.0892               |
| Final R indexes [all data]                  | R <sub>1</sub> = 0.0349, wR <sub>2</sub> = 0.0893               |
| Largest diff. peak/hole / e Å <sup>-3</sup> | 0.32/-0.49                                                      |

**Table 2 Fractional Atomic Coordinates (×10<sup>4</sup>) and Equivalent Isotropic Displacement Parameters (Å<sup>2</sup>×10<sup>3</sup>) for 13. U<sub>eq</sub> is defined as 1/3 of of the trace**

**of the orthogonalised  $U_{ij}$  tensor.**

| <b>Atom</b> | <b>x</b>    | <b>y</b>    | <b>z</b>    | <b>U(eq)</b> |
|-------------|-------------|-------------|-------------|--------------|
| S1          | 7366.3 (2)  | 5399.3 (3)  | 6318.8 (2)  | 15.13 (9)    |
| O1          | 8059.2 (7)  | 5873.2 (10) | 6961.2 (5)  | 23.2 (2)     |
| O2          | 6353.3 (6)  | 5887.7 (9)  | 6118.7 (5)  | 19.66 (19)   |
| N1          | 7256.0 (8)  | 3670.0 (11) | 6335.8 (5)  | 16.1 (2)     |
| N2          | 5753.8 (8)  | 3114.4 (12) | 4033.4 (6)  | 21.1 (2)     |
| C1          | 7877.8 (9)  | 5798.4 (13) | 5654.3 (6)  | 17.4 (2)     |
| C2          | 7258.7 (10) | 5775.3 (13) | 4967.3 (7)  | 20.7 (3)     |
| C3          | 7660.2 (11) | 6070.6 (14) | 4442.0 (7)  | 25.6 (3)     |
| C4          | 8668.6 (12) | 6382.9 (17) | 4590.4 (8)  | 31.5 (3)     |
| C5          | 9271.7 (11) | 6388.6 (19) | 5279.9 (9)  | 34.9 (4)     |
| C6          | 8884.6 (10) | 6106.6 (16) | 5817.5 (7)  | 26.4 (3)     |
| C7          | 9097.1 (14) | 6719 (2)    | 4013.2 (10) | 50.8 (5)     |
| C8          | 8022.9 (9)  | 2633.1 (13) | 6456.8 (6)  | 16.4 (2)     |
| C9          | 8976.6 (9)  | 2941.7 (15) | 6897.2 (6)  | 21.8 (3)     |
| C10         | 9717 (1)    | 1908.2 (17) | 7044.8 (7)  | 27.1 (3)     |
| C11         | 9501.1 (11) | 563.0 (17)  | 6760.4 (7)  | 29.5 (3)     |
| C12         | 8550.8 (11) | 252.4 (15)  | 6324.1 (7)  | 25.6 (3)     |
| C13         | 7794.3 (9)  | 1274.7 (14) | 6152.0 (6)  | 18.1 (3)     |
| C14         | 6755.2 (9)  | 930.3 (13)  | 5636.0 (6)  | 17.6 (2)     |
| C15         | 5990.4 (9)  | 1242.1 (13) | 5976.5 (6)  | 18.5 (3)     |
| C16         | 5396.4 (9)  | 1571.5 (13) | 6262.7 (6)  | 18.8 (3)     |
| C17         | 4721.5 (9)  | 1972.1 (13) | 6634.6 (6)  | 17.4 (2)     |
| C18         | 4892.6 (10) | 3213.0 (14) | 7038.8 (7)  | 20.9 (3)     |
| C19         | 4268 (1)    | 3557.7 (14) | 7424.1 (7)  | 23.5 (3)     |
| C20         | 3473.1 (10) | 2679.0 (15) | 7413.3 (7)  | 23.4 (3)     |
| C21         | 3297 (1)    | 1447.5 (15) | 7012.1 (7)  | 23.4 (3)     |
| C22         | 3913 (1)    | 1094.2 (14) | 6622.3 (7)  | 20.5 (3)     |
| C23         | 6645.8 (11) | -658.8 (14) | 5420.5 (8)  | 25.6 (3)     |
| C24         | 6556.5 (9)  | 1821.6 (12) | 4976.2 (6)  | 16.0 (2)     |
| C25         | 7166.8 (9)  | 1884.9 (13) | 4524.8 (6)  | 17.7 (2)     |
| C26         | 8093.4 (10) | 1300.1 (15) | 4544.5 (7)  | 24.8 (3)     |
| C27         | 8440.3 (12) | 1529.9 (18) | 3986.6 (8)  | 32.8 (3)     |
| C28         | 7897.5 (12) | 2345.5 (18) | 3411.2 (8)  | 33.5 (3)     |
| C29         | 6991.2 (11) | 2937.3 (15) | 3378.2 (7)  | 27.1 (3)     |
| C30         | 6632.9 (10) | 2692.8 (13) | 3936.8 (6)  | 19.9 (3)     |



C31                    5710.5 (9)                    2575.0 (13)                    4654.1 (6)                    18.7 (2)

**Table 3 Anisotropic Displacement Parameters ( $\text{\AA}^2 \times 10^3$ ) for 13. The Anisotropic displacement factor exponent takes the form:  $-2\pi^2[h^2a^2U_{11}+2hka^*b^*U_{12}+\dots]$ .**

| Atom | U <sub>11</sub> | U <sub>22</sub> | U <sub>33</sub> | U <sub>23</sub> | U <sub>13</sub> | U <sub>12</sub> |
|------|-----------------|-----------------|-----------------|-----------------|-----------------|-----------------|
| S1   | 13.59 (16)      | 15.99 (15)      | 16.54 (15)      | -4.14 (10)      | 5.76 (12)       | -1.95 (10)      |
| O1   | 19.1 (5)        | 30.0 (5)        | 21.0 (5)        | -10.2 (4)       | 6.8 (4)         | -5.5 (4)        |
| O2   | 17.1 (4)        | 18.1 (4)        | 25.0 (4)        | -3.0 (3)        | 8.2 (4)         | 0.8 (3)         |
| N1   | 11.1 (5)        | 16.9 (5)        | 18.9 (5)        | 0.0 (4)         | 2.5 (4)         | -1.3 (4)        |
| N2   | 19.6 (6)        | 20.3 (5)        | 19.2 (5)        | 3.0 (4)         | 0.1 (4)         | 0.6 (4)         |
| C1   | 19.3 (6)        | 14.0 (5)        | 21.5 (6)        | -1.3 (5)        | 9.8 (5)         | -0.8 (4)        |
| C2   | 23.8 (7)        | 16.5 (6)        | 22.5 (6)        | -1.1 (5)        | 8.1 (5)         | -3.1 (5)        |
| C3   | 34.7 (8)        | 21.4 (6)        | 22.1 (6)        | 2.6 (5)         | 11.1 (6)        | 1.5 (5)         |
| C4   | 35.4 (8)        | 33.2 (8)        | 33.1 (8)        | 10.3 (6)        | 21.2 (7)        | 6.7 (6)         |
| C5   | 22.3 (7)        | 47.2 (9)        | 39.5 (8)        | 9.4 (7)         | 15.9 (6)        | -0.6 (6)        |
| C6   | 20.4 (7)        | 32.9 (7)        | 26.9 (7)        | 1.6 (6)         | 9.1 (5)         | -1.8 (5)        |
| C7   | 45.7 (10)       | 74.7 (13)       | 43.1 (10)       | 23.9 (9)        | 30.2 (9)        | 12.8 (9)        |
| C8   | 14.3 (6)        | 22.4 (6)        | 13.4 (5)        | 4.9 (5)         | 5.3 (4)         | 3.3 (5)         |
| C9   | 16.8 (6)        | 33.3 (7)        | 14.9 (6)        | 2.9 (5)         | 4.3 (5)         | 0.9 (5)         |
| C10  | 15.8 (6)        | 48.4 (9)        | 15.9 (6)        | 8.9 (6)         | 3.4 (5)         | 7.5 (6)         |
| C11  | 24.0 (7)        | 43.5 (9)        | 21.9 (7)        | 12.9 (6)        | 8.4 (6)         | 19.7 (6)        |
| C12  | 30.0 (7)        | 26.1 (7)        | 22.4 (6)        | 6.9 (5)         | 10.7 (6)        | 12.4 (6)        |
| C13  | 18.7 (6)        | 21.4 (6)        | 15.7 (6)        | 5.6 (5)         | 7.6 (5)         | 4.4 (5)         |
| C14  | 19.3 (6)        | 12.8 (6)        | 20.7 (6)        | 1.4 (5)         | 6.4 (5)         | 1.2 (4)         |
| C15  | 18.7 (6)        | 14.3 (5)        | 21.4 (6)        | 3.0 (5)         | 4.9 (5)         | -2.7 (5)        |
| C16  | 18.5 (6)        | 16.0 (6)        | 20.4 (6)        | 3.6 (5)         | 3.8 (5)         | -2.9 (5)        |
| C17  | 18.0 (6)        | 17.7 (6)        | 15.4 (5)        | 4.1 (4)         | 3.7 (5)         | -0.1 (5)        |
| C18  | 19.5 (6)        | 19.1 (6)        | 21.3 (6)        | 1.4 (5)         | 2.4 (5)         | -3.9 (5)        |
| C19  | 29.3 (7)        | 20.4 (6)        | 18.4 (6)        | -1.7 (5)        | 3.9 (5)         | 0.2 (5)         |
| C20  | 27.5 (7)        | 26.6 (7)        | 18.5 (6)        | 4.5 (5)         | 10.8 (5)        | 3.7 (5)         |
| C21  | 23.4 (7)        | 23.8 (7)        | 25.0 (6)        | 4.5 (5)         | 10.3 (5)        | -4.2 (5)        |
| C22  | 22.9 (6)        | 18.0 (6)        | 20.4 (6)        | 0.1 (5)         | 6.5 (5)         | -3.7 (5)        |
| C23  | 32.3 (8)        | 13.7 (6)        | 31.7 (7)        | 0.8 (5)         | 11.3 (6)        | -0.2 (5)        |
| C24  | 15.6 (6)        | 13.7 (5)        | 17.1 (6)        | -2.4 (4)        | 3.1 (5)         | -3.0 (4)        |
| C25  | 20.1 (6)        | 15.6 (6)        | 16.4 (6)        | -4.5 (4)        | 4.2 (5)         | -3.8 (5)        |
| C26  | 22.8 (7)        | 29.1 (7)        | 22.6 (6)        | -3.2 (5)        | 7.2 (5)         | 2.1 (5)         |

|     |          |          |          |          |          |          |
|-----|----------|----------|----------|----------|----------|----------|
| C27 | 28.8 (8) | 43.6 (9) | 30.4 (7) | -7.8 (6) | 15.4 (6) | 0.9 (6)  |
| C28 | 41.3 (9) | 41.7 (9) | 23.0 (7) | -6.4 (6) | 17.7 (6) | -8.1 (7) |
| C29 | 36.7 (8) | 26.7 (7) | 17.2 (6) | -1.9 (5) | 7.4 (6)  | -6.4 (6) |
| C30 | 22.7 (6) | 16.7 (6) | 17.7 (6) | -4.1 (5) | 2.7 (5)  | -5.3 (5) |
| C31 | 17.4 (6) | 16.7 (6) | 21.0 (6) | 0.5 (5)  | 4.7 (5)  | -2.1 (5) |

**Table 4 Bond Lengths for 13.**

| Atom | Atom | Length/Å    | Atom | Atom | Length/Å    |
|------|------|-------------|------|------|-------------|
| S1   | O1   | 1.4321 (9)  | C13  | C14  | 1.5461 (17) |
| S1   | O2   | 1.4347 (9)  | C14  | C15  | 1.4815 (17) |
| S1   | N1   | 1.6313 (11) | C14  | C23  | 1.5475 (17) |
| S1   | C1   | 1.7557 (12) | C14  | C24  | 1.5260 (17) |
| N1   | C8   | 1.4191 (15) | C15  | C16  | 1.2000 (19) |
| N2   | C30  | 1.3743 (18) | C16  | C17  | 1.4377 (17) |
| N2   | C31  | 1.3743 (17) | C17  | C18  | 1.4000 (18) |
| C1   | C2   | 1.3927 (18) | C17  | C22  | 1.4021 (17) |
| C1   | C6   | 1.3861 (18) | C18  | C19  | 1.3867 (19) |
| C2   | C3   | 1.3813 (19) | C19  | C20  | 1.3876 (19) |
| C3   | C4   | 1.392 (2)   | C20  | C21  | 1.389 (2)   |
| C4   | C5   | 1.390 (2)   | C21  | C22  | 1.3858 (19) |
| C4   | C7   | 1.509 (2)   | C24  | C25  | 1.4409 (17) |
| C5   | C6   | 1.388 (2)   | C24  | C31  | 1.3656 (17) |
| C8   | C9   | 1.3935 (18) | C25  | C26  | 1.4082 (18) |
| C8   | C13  | 1.4088 (18) | C25  | C30  | 1.4140 (18) |
| C9   | C10  | 1.3884 (19) | C26  | C27  | 1.382 (2)   |
| C10  | C11  | 1.381 (2)   | C27  | C28  | 1.404 (2)   |
| C11  | C12  | 1.388 (2)   | C28  | C29  | 1.378 (2)   |
| C12  | C13  | 1.3965 (18) | C29  | C30  | 1.3953 (19) |

**Table 5 Bond Angles for 13.**

| Atom | Atom | Atom | Angle/°    | Atom | Atom | Atom | Angle/°     |
|------|------|------|------------|------|------|------|-------------|
| O1   | S1   | O2   | 119.67 (5) | C15  | C14  | C13  | 108.69 (10) |
| O1   | S1   | N1   | 109.40 (6) | C15  | C14  | C23  | 107.37 (10) |
| O1   | S1   | C1   | 107.57 (6) | C15  | C14  | C24  | 109.78 (10) |

|     |     |     |             |     |     |     |             |
|-----|-----|-----|-------------|-----|-----|-----|-------------|
| O2  | S1  | N1  | 103.31 (5)  | C24 | C14 | C13 | 110.65 (10) |
| O2  | S1  | C1  | 109.20 (6)  | C24 | C14 | C23 | 107.83 (10) |
| N1  | S1  | C1  | 107.05 (6)  | C16 | C15 | C14 | 176.17 (13) |
| C8  | N1  | S1  | 127.78 (9)  | C15 | C16 | C17 | 177.40 (13) |
| C31 | N2  | C30 | 108.98 (11) | C18 | C17 | C16 | 120.16 (11) |
| C2  | C1  | S1  | 118.82 (10) | C18 | C17 | C22 | 119.30 (12) |
| C6  | C1  | S1  | 119.97 (10) | C22 | C17 | C16 | 120.48 (11) |
| C6  | C1  | C2  | 121.19 (12) | C19 | C18 | C17 | 119.95 (12) |
| C3  | C2  | C1  | 119.05 (12) | C18 | C19 | C20 | 120.46 (12) |
| C2  | C3  | C4  | 121.01 (13) | C19 | C20 | C21 | 119.94 (12) |
| C3  | C4  | C7  | 120.57 (15) | C22 | C21 | C20 | 120.18 (12) |
| C5  | C4  | C3  | 118.80 (13) | C21 | C22 | C17 | 120.17 (12) |
| C5  | C4  | C7  | 120.62 (15) | C25 | C24 | C14 | 126.55 (11) |
| C6  | C5  | C4  | 121.29 (14) | C31 | C24 | C14 | 126.54 (11) |
| C1  | C6  | C5  | 118.65 (13) | C31 | C24 | C25 | 106.47 (11) |
| C9  | C8  | N1  | 120.06 (12) | C26 | C25 | C24 | 134.55 (12) |
| C9  | C8  | C13 | 120.76 (12) | C26 | C25 | C30 | 118.59 (12) |
| C13 | C8  | N1  | 119.12 (11) | C30 | C25 | C24 | 106.81 (11) |
| C10 | C9  | C8  | 120.32 (13) | C27 | C26 | C25 | 118.71 (13) |
| C11 | C10 | C9  | 119.69 (13) | C26 | C27 | C28 | 121.49 (14) |
| C10 | C11 | C12 | 120.05 (13) | C29 | C28 | C27 | 121.15 (13) |
| C11 | C12 | C13 | 121.80 (14) | C28 | C29 | C30 | 117.51 (13) |
| C8  | C13 | C14 | 121.61 (11) | N2  | C30 | C25 | 107.56 (11) |
| C12 | C13 | C8  | 117.35 (12) | N2  | C30 | C29 | 129.89 (13) |
| C12 | C13 | C14 | 121.03 (12) | C29 | C30 | C25 | 122.53 (13) |
| C13 | C14 | C23 | 112.45 (10) | C24 | C31 | N2  | 110.16 (11) |

**Table 6 Hydrogen Bonds for 13.**

| D H A               | d(D-H)/Å   | d(H-A)/Å   | d(D-A)/Å    | D-H-A/°    |
|---------------------|------------|------------|-------------|------------|
| N2H2O2 <sup>1</sup> | 0.859 (18) | 2.453 (17) | 3.0426 (15) | 126.4 (14) |

<sup>1</sup>I-X,I-Y,I-Z

**Table 7 Torsion Angles for 13.**

| A | B | C | D | Angle/° | A | B | C | D | Angle/° |
|---|---|---|---|---------|---|---|---|---|---------|
|---|---|---|---|---------|---|---|---|---|---------|

|    |     |     |     |             |                 |             |   |
|----|-----|-----|-----|-------------|-----------------|-------------|---|
| S1 | N1  | C8  | C9  | 32.08 (16)  | C12 C13 C14 C24 | 114.28 (13) | - |
| S1 | N1  | C8  | C13 | 150.78 (10) | C13 C8 C9 C10   | -0.28 (18)  | - |
| S1 | C1  | C2  | C3  | 179.18 (10) | C13 C14 C24 C25 | 56.04 (15)  | - |
| S1 | C1  | C6  | C5  | 178.66 (12) | C13 C14 C24 C31 | 132.53 (13) | - |
| O1 | S1  | N1  | C8  | -56.14 (11) | C14 C24 C25 C26 | -4.7 (2)    | - |
| O1 | S1  | C1  | C2  | 164.22 (10) | C14 C24 C25 C30 | 172.53 (11) | - |
| O1 | S1  | C1  | C6  | 16.80 (13)  | C14 C24 C31 N2  | 173.26 (11) | - |
| O2 | S1  | N1  | C8  | 175.35 (10) | C15 C14 C24 C25 | 176.00 (11) | - |
| O2 | S1  | C1  | C2  | -32.91 (12) | C15 C14 C24 C31 | -12.57 (17) | - |
| O2 | S1  | C1  | C6  | 148.10 (11) | C16 C17 C18 C19 | 176.78 (12) | - |
| N1 | S1  | C1  | C2  | 78.29 (11)  | C16 C17 C22 C21 | 176.49 (12) | - |
| N1 | S1  | C1  | C6  | 100.69 (11) | C17 C18 C19 C20 | 0.1 (2)     | - |
| N1 | C8  | C9  | C10 | 176.81 (11) | C18 C17 C22 C21 | -0.61 (19)  | - |
| N1 | C8  | C13 | C12 | 175.46 (11) | C18 C19 C20 C21 | -0.3 (2)    | - |
| N1 | C8  | C13 | C14 | 5.70 (17)   | C19 C20 C21 C22 | 0.0 (2)     | - |
| C1 | S1  | N1  | C8  | 60.14 (11)  | C20 C21 C22 C17 | 0.5 (2)     | - |
| C1 | C2  | C3  | C4  | 0.2 (2)     | C22 C17 C18 C19 | 0.32 (19)   | - |
| C2 | C1  | C6  | C5  | -0.3 (2)    | C23 C14 C24 C25 | -67.32 (15) | - |
| C2 | C3  | C4  | C5  | 0.2 (2)     | C23 C14 C24 C31 | 104.11 (14) | - |
| C2 | C3  | C4  | C7  | 179.34 (15) | C24 C25 C26 C27 | 176.52 (14) | - |
| C3 | C4  | C5  | C6  | -0.8 (2)    | C24 C25 C30 N2  | 0.91 (13)   | - |
| C4 | C5  | C6  | C1  | 0.8 (2)     | C24 C25 C30 C29 | 178.07 (12) | - |
| C6 | C1  | C2  | C3  | -0.21 (19)  | C25 C24 C31 N2  | -0.43 (14)  | - |
| C7 | C4  | C5  | C6  | 178.82 (16) | C25 C26 C27 C28 | 0.9 (2)     | - |
| C8 | C9  | C10 | C11 | -0.89 (19)  | C26 C25 C30 N2  | 178.67 (11) | - |
| C8 | C13 | C14 | C15 | -56.09 (14) | C26 C25 C30 C29 | -0.31 (19)  | - |
| C8 | C13 | C14 | C23 | -           | C26 C27 C28 C29 | -0.6 (2)    | - |

|              |             |             |                 |             |             |
|--------------|-------------|-------------|-----------------|-------------|-------------|
|              |             | 174.83 (11) |                 |             |             |
| C8 C13C14C24 | 64.52 (14)  |             | C27 C28 C29 C30 | -0.2 (2)    |             |
| C9 C8 C13C12 | 1.65 (17)   |             | C28 C29 C30 N2  |             | 178.11 (13) |
| C9 C8 C13C14 | 177.19 (11) |             | C28 C29 C30 C25 | 0.6 (2)     |             |
| C9 C10C11C12 | 0.6 (2)     |             | C30 N2 C31 C24  | 1.03 (14)   |             |
| C10C11C12C13 | 0.8 (2)     |             | C30 C25 C26 C27 | -0.47 (19)  |             |
| C11C12C13C8  | -1.95 (19)  |             | C31 N2 C30 C25  | -1.19 (14)  |             |
| C11C12C13C14 | 176.91 (12) |             | C31 N2 C30 C29  | 177.69 (13) |             |
| C12C13C14C15 | 125.11 (12) |             | C31 C24 C25 C26 |             | 177.54 (14) |
| C12C13C14C23 | 6.37 (16)   |             | C31 C24 C25 C30 | -0.30 (13)  |             |

**Table 8 Hydrogen Atom Coordinates ( $\text{\AA} \times 10^4$ ) and Isotropic Displacement Parameters ( $\text{\AA}^2 \times 10^3$ ) for 13.**

| Atom | x         | y         | z        | U(eq) |
|------|-----------|-----------|----------|-------|
| H1   | 6676 (12) | 3411 (17) | 6097 (8) | 19    |
| H2   | 5264 (13) | 3537 (18) | 3736 (9) | 25    |
| H2A  | 6570      | 5560      | 4861     | 25    |
| H3   | 7242      | 6060      | 3972     | 31    |
| H5   | 9962      | 6589      | 5385     | 42    |
| H6   | 9301      | 6124      | 6288     | 32    |
| H7A  | 8901      | 5976      | 3656     | 76    |
| H7B  | 9826      | 6757      | 4202     | 76    |
| H7C  | 8843      | 7643      | 3807     | 76    |
| H9   | 9121      | 3864      | 7098     | 26    |
| H10  | 10369     | 2125      | 7340     | 33    |
| H11  | 10004     | -150      | 6864     | 35    |
| H12  | 8411      | -681      | 6137     | 31    |
| H18  | 5436      | 3818      | 7049     | 25    |
| H19  | 4385      | 4401      | 7697     | 28    |
| H20  | 3050      | 2919      | 7680     | 28    |
| H21  | 2753      | 846       | 7005     | 28    |
| H22  | 3787      | 255       | 6346     | 25    |
| H23A | 6746      | -1255     | 5834     | 38    |

|      |      |      |      |    |
|------|------|------|------|----|
| H23B | 7145 | -902 | 5195 | 38 |
| H23C | 5977 | -826 | 5096 | 38 |
| H26  | 8473 | 758  | 4934 | 30 |
| H27  | 9060 | 1127 | 3993 | 39 |
| H28  | 8160 | 2492 | 3038 | 40 |
| H29  | 6624 | 3491 | 2990 | 33 |
| H31  | 5170 | 2707 | 4833 | 22 |

20140820.LiH-n-Bu

Archive directory: /export/home/huili/vnmrsys/data  
Sample directory: 20140820.LiH-n-Bu

Pulse Sequence: s2pu1

Solvent: CDCl3  
Temp. 25.0 C / 298.1 K  
File: PROTON  
INOVA-500 "nmr03"

Relax. delay 1.000 sec  
Pulse 45.0 degrees  
Acq. time 3.754 sec  
Width 6387.7 Hz  
32 repetitions  
OBSERVE H1, 399.7865233 MHz  
DATA PROCESSING  
FT size 65536  
Total time 2 min, 51 sec

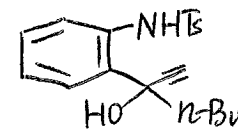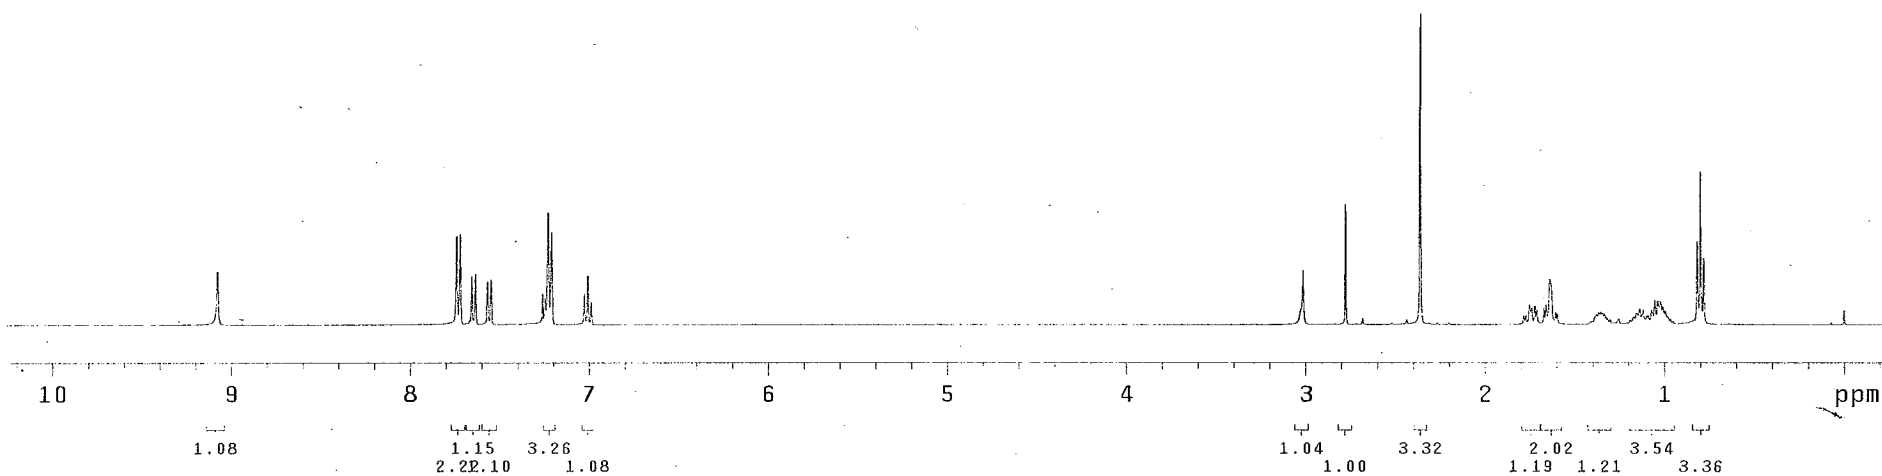

LiH-I-45\_24Oct2013-19:01:21

Archive directory: /export/home/huili/vnmrsys/data  
Sample directory: LiH-I-45\_24Oct2013-19:01:21

Pulse Sequence: s2pu1

Solvent: CDCl3  
Temp. 25.0 C / 298.1 K  
File: CARBON  
INNOVA-500 "nmr03"

Relax. delay 1.000 sec  
Pulse 45.0 degrees  
Acq. time 1.197 sec  
Width 25157.2 Hz  
128 repetitions  
OBSERVE C13, 100.5263859 MHz  
DECOUPLE H1, 399.7885243 MHz  
Power 43 dB  
continuously on  
WALTZ-16 modulated  
DATA PROCESSING  
Line broadening 0.8 Hz  
FT size 65536  
Total time 4 min, 42 sec

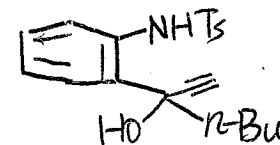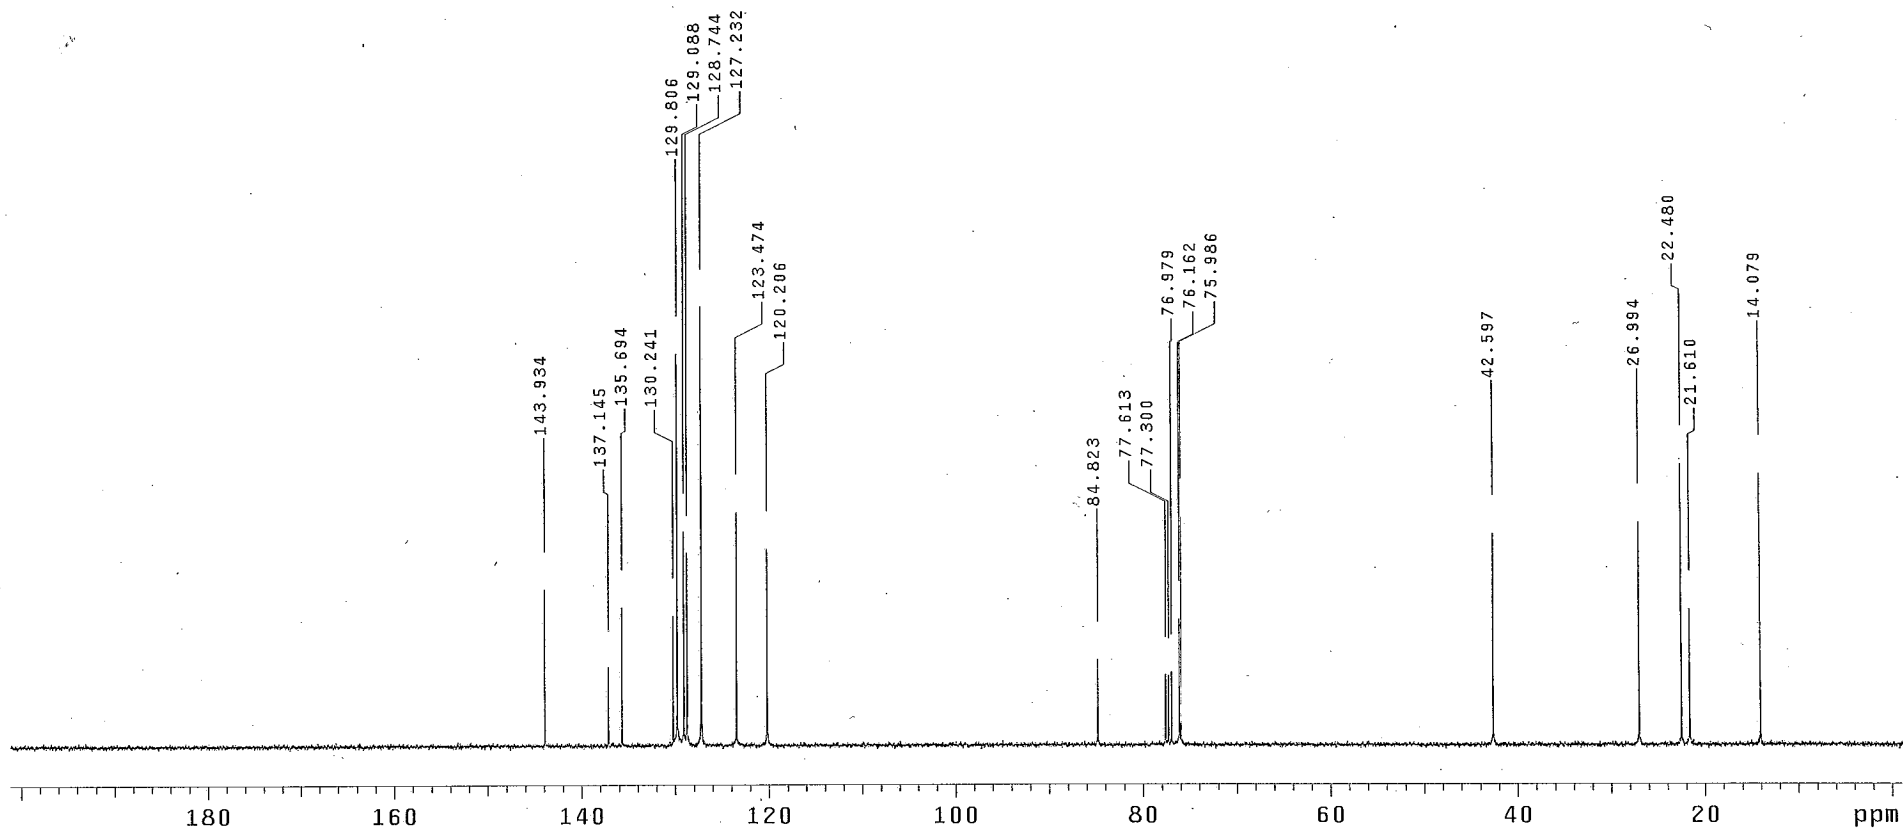



LiH-I-44\_29Oct2013

Archive directory: /export/home/huili/vnmrSYS/data  
Sample directory: LiH-I-44\_29Oct2013

Pulse Sequence: s2pul

Solvent: CDCl<sub>3</sub>  
Temp. 25.0 C / 298.1 K  
File: PROTON  
INNOVA-500 "nmr03"

Relax. delay 1.000 sec  
Pulse 45.0 degrees  
Acq. time 3.754 sec  
Width 6387.7 Hz  
8 repetitions  
OBSERVE H1, 399.7865227 MHz  
DATA PROCESSING  
FT size 65536  
Total time 0 min, 57 sec

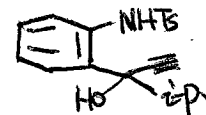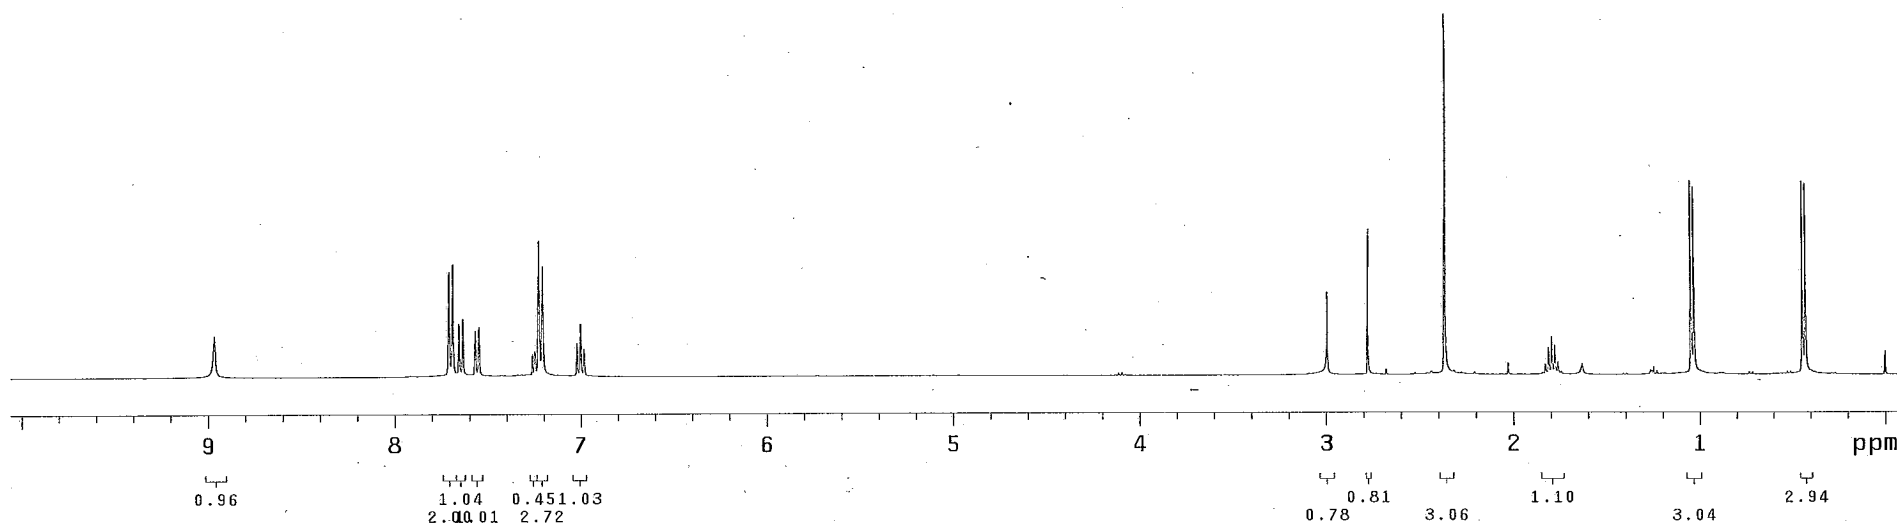

LiH-I-44\_29Oct2013-16:58:01

Archive directory: /export/home/huili/vnmrsys/data  
Sample directory: LiH-I-44\_29Oct2013-16:58:01

Pulse Sequence: s2pul

Solvent: CDCl3  
Temp. 25.0 C / 298.1 K  
File: CARBON  
INNOVA-500 "nmr03"

Relax. delay 1.000 sec  
Pulse 45.0 degrees  
Acq. time 1.197 sec  
Width 25157.2 Hz  
256 repetitions  
OBSERVE C13, 100.5263736 MHz  
DECOUPLE H1, 399.7885243 MHz  
Power 43 dB  
continuously on  
WALTZ-16 modulated  
DATA PROCESSING  
Line broadening 0.8 Hz  
FT size 65536  
Total time 9 min, 24 sec

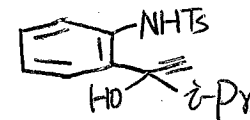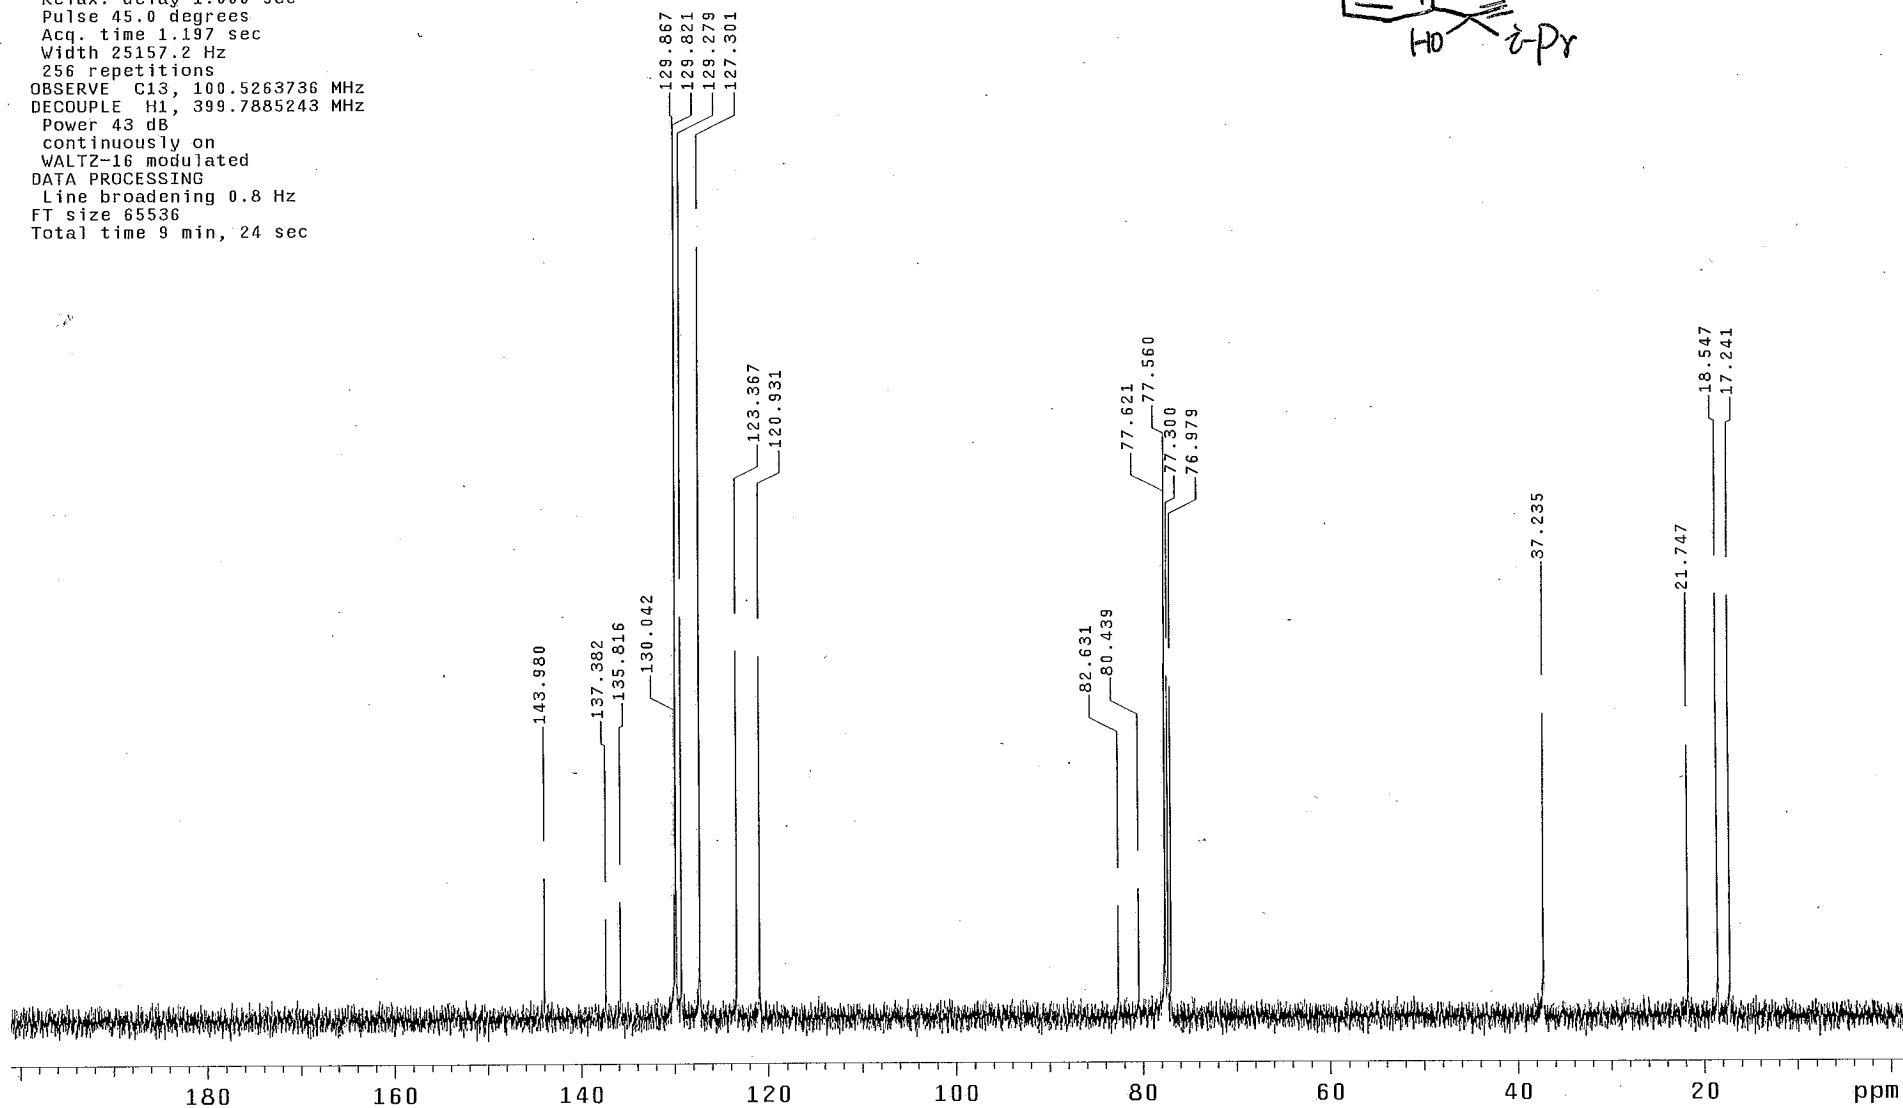

20140820.LiH-furan

Archive directory: /export/home/huili/vnmrsys/data  
Sample directory: 20140820.LiH-furan

Pulse Sequence: s2pul

Solvent: CDCl3  
Temp. 25.0 C / 298.1 K  
File: PROTON  
INNOVA-500 "nmr03"

Relax. delay 1.000 sec  
Pulse 45.0 degrees  
Acq. time 3.747 sec  
Width 8000.0 Hz  
32 repetitions  
OBSERVE H1, 499.7288173 MHz  
DATA PROCESSING  
Line broadening 0.5 Hz  
FT size 65536  
Total time 2 min, 32 sec

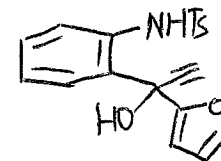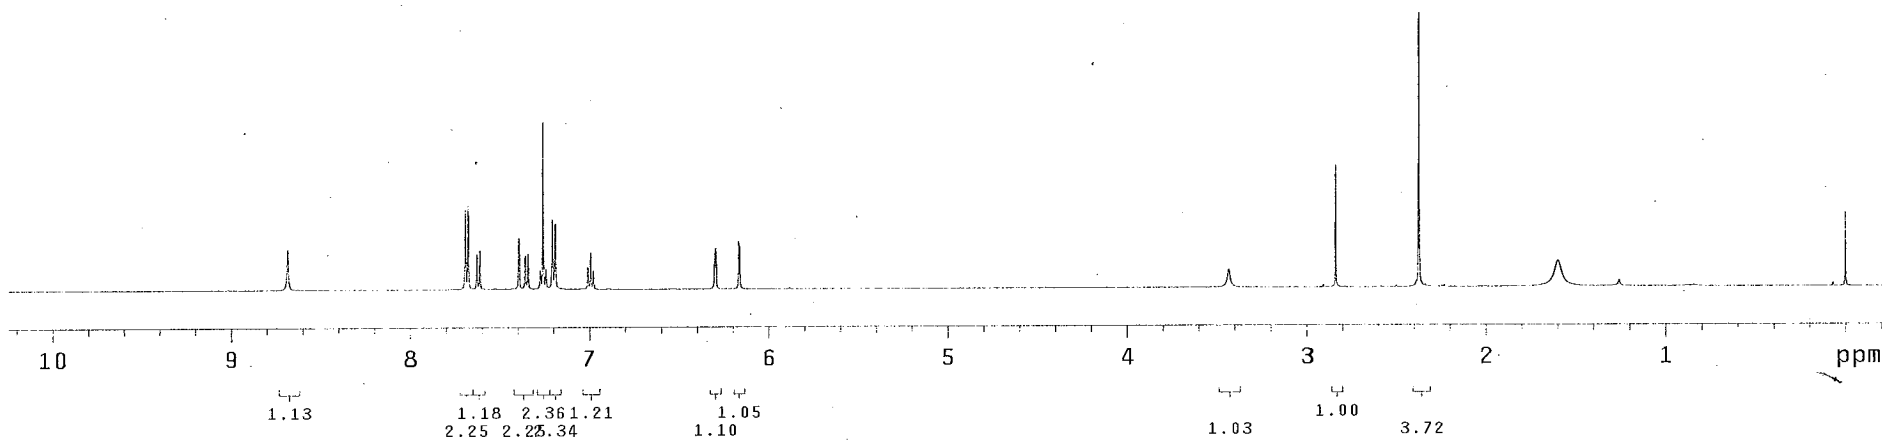

LiH-I-59\_29Oct2013-16:31:29

Archive directory: /export/home/huili/vnmrsys/data  
Sample directory: LiH-I-59\_29Oct2013-16:31:29

Pulse Sequence: s2pul

Solvent: CDCl3  
Temp. 25.0 C / 298.1 K  
File: CARBON  
INNOVA-500 "nmr03"

Relax. delay 1.000 sec  
Pulse 45.0 degrees  
Acq. time 1.197 sec  
Width 25157.2 Hz  
256 repetitions  
OBSERVE C13, 100.5263752 MHz  
DECOUPLE H1, 399.7885243 MHz  
Power 43 dB  
continuously on  
WALTZ-16 modulated  
DATA PROCESSING  
Line broadening 0.8 Hz  
FT size 65536  
Total time 9 min, 24 sec

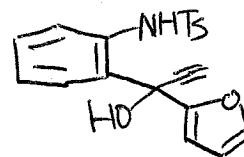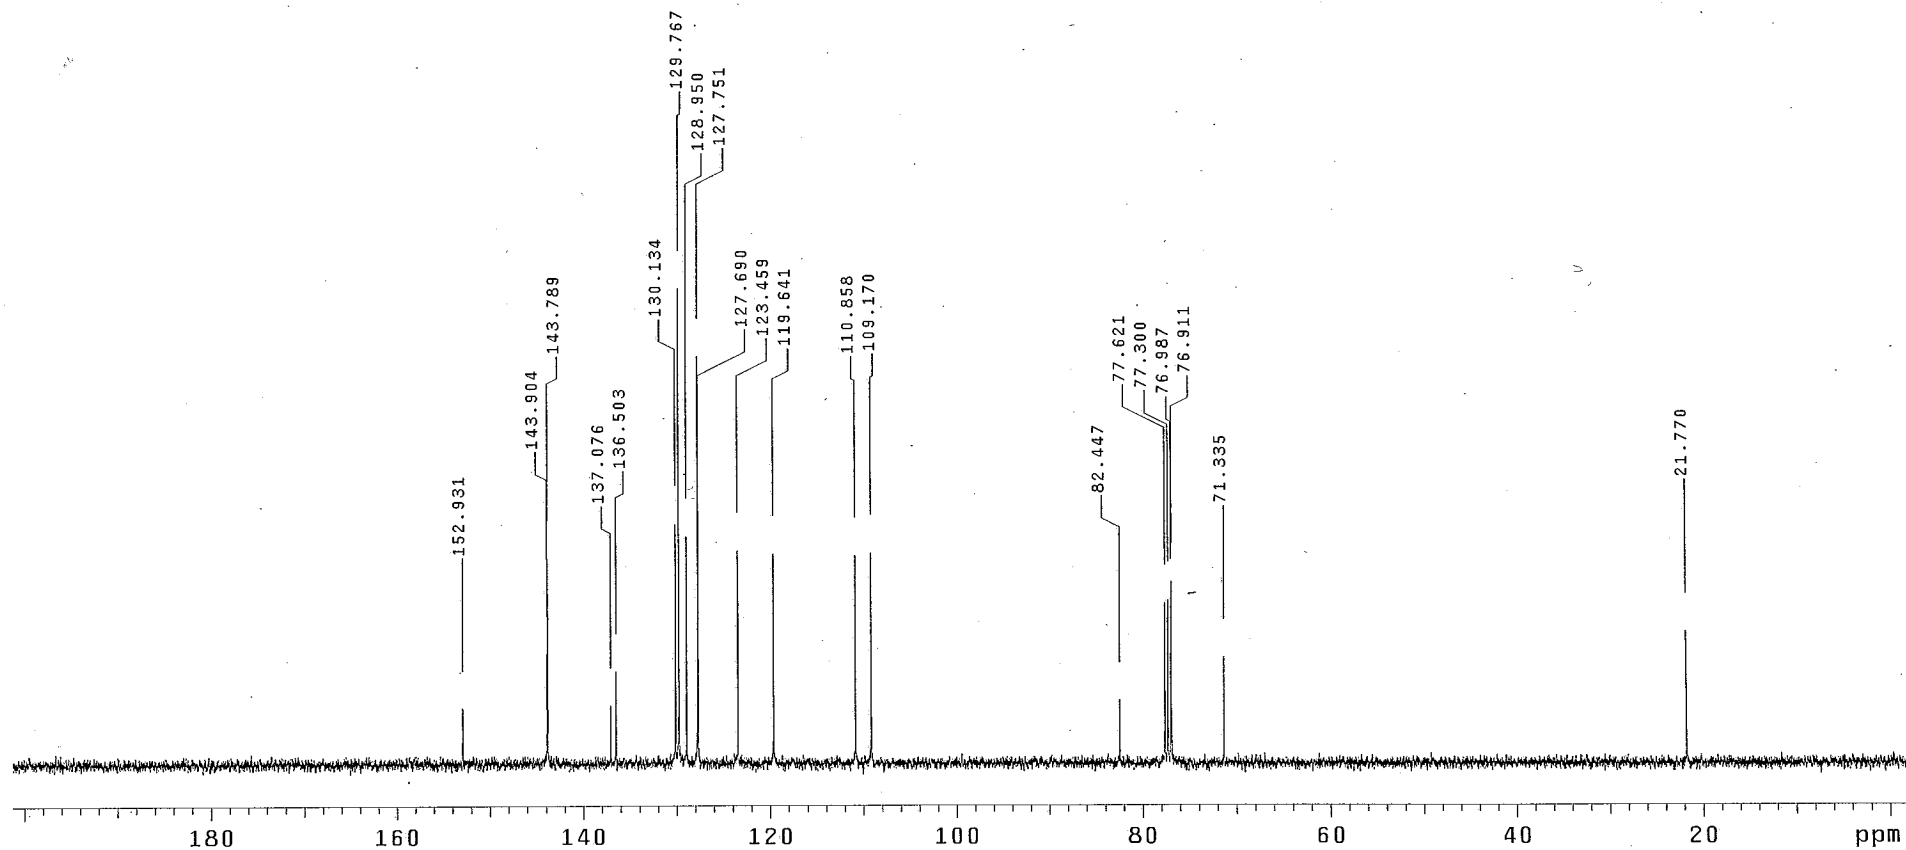

LiH-II-33\_20May2014

Archive directory: /export/home/huili/vnmrsys/data  
Sample directory: LiH-II-33\_20May2014

Pulse Sequence: s2pul

Solvent: CDCl3  
Temp. 25.0 C / 298.1 K  
File: PROTON  
INOVA-500 "nmr03"

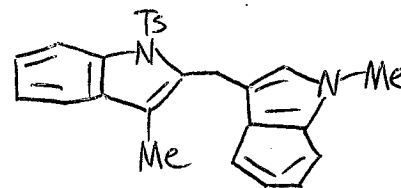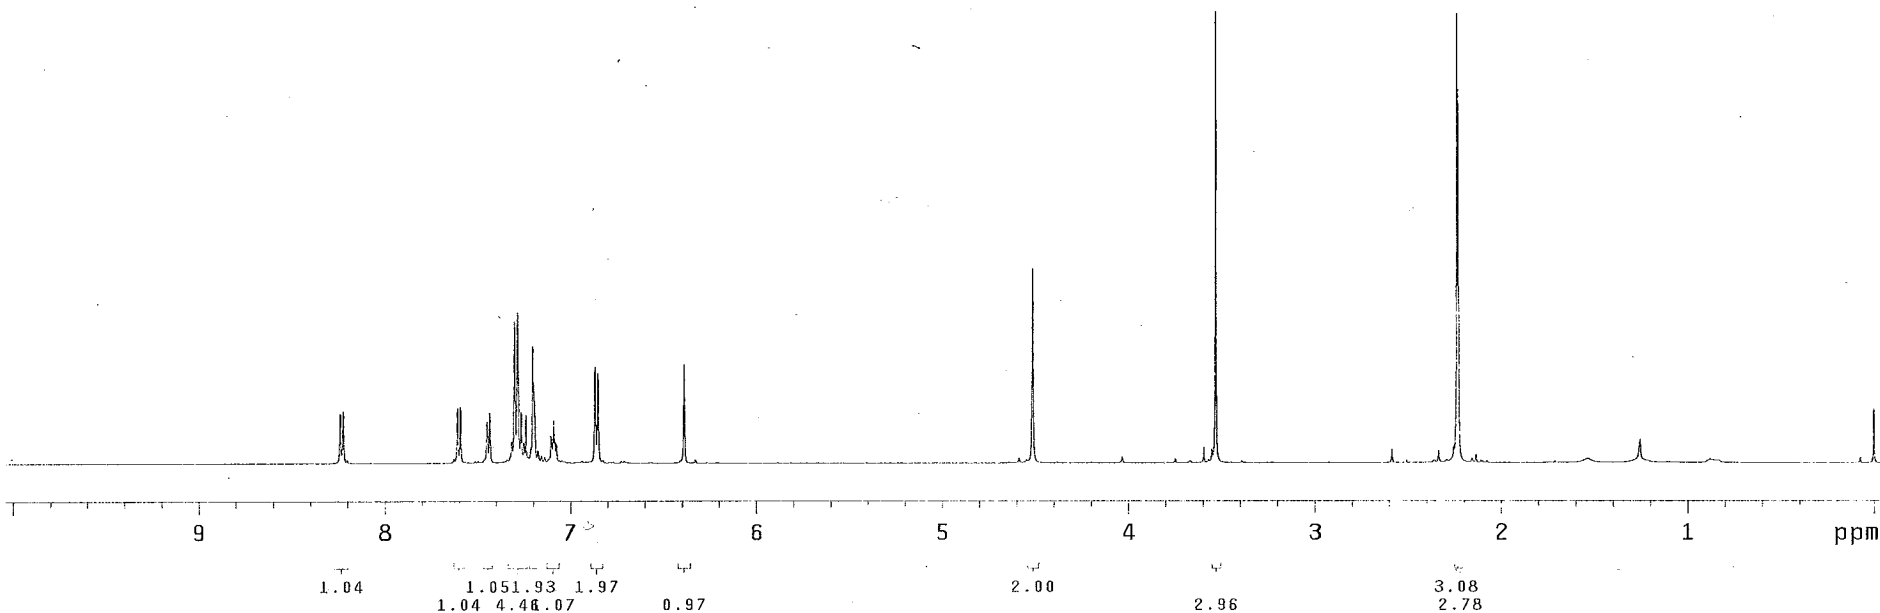

LiH-II-33\_21May2014

Archive directory: /export/home/huili/vnmrsys/data  
Sample directory: LiH-II-33\_21May2014  
File: CARBON

Pulse Sequence: s2pul

Solvent: CDCl3  
Temp. 25.0 C / 298.1 K  
User: 1-14-87  
INOVA-500 "ui500"

Relax. delay 1.000 sec  
Pulse 45.0 degrees  
Acq. time 1.299 sec  
Width 31446.5 Hz  
467 repetitions  
OBSERVE C13, 125.6568765 MHz  
DECOUPLE H1, 499.7312897 MHz  
Power 39 dB  
continuously on  
WALTZ-16 modulated  
DATA PROCESSING  
Line broadening 0.5 Hz  
FT size 131072  
Total time 19 min, 46 sec

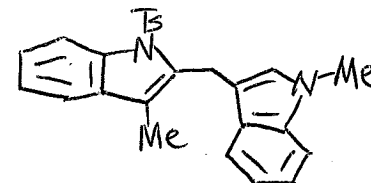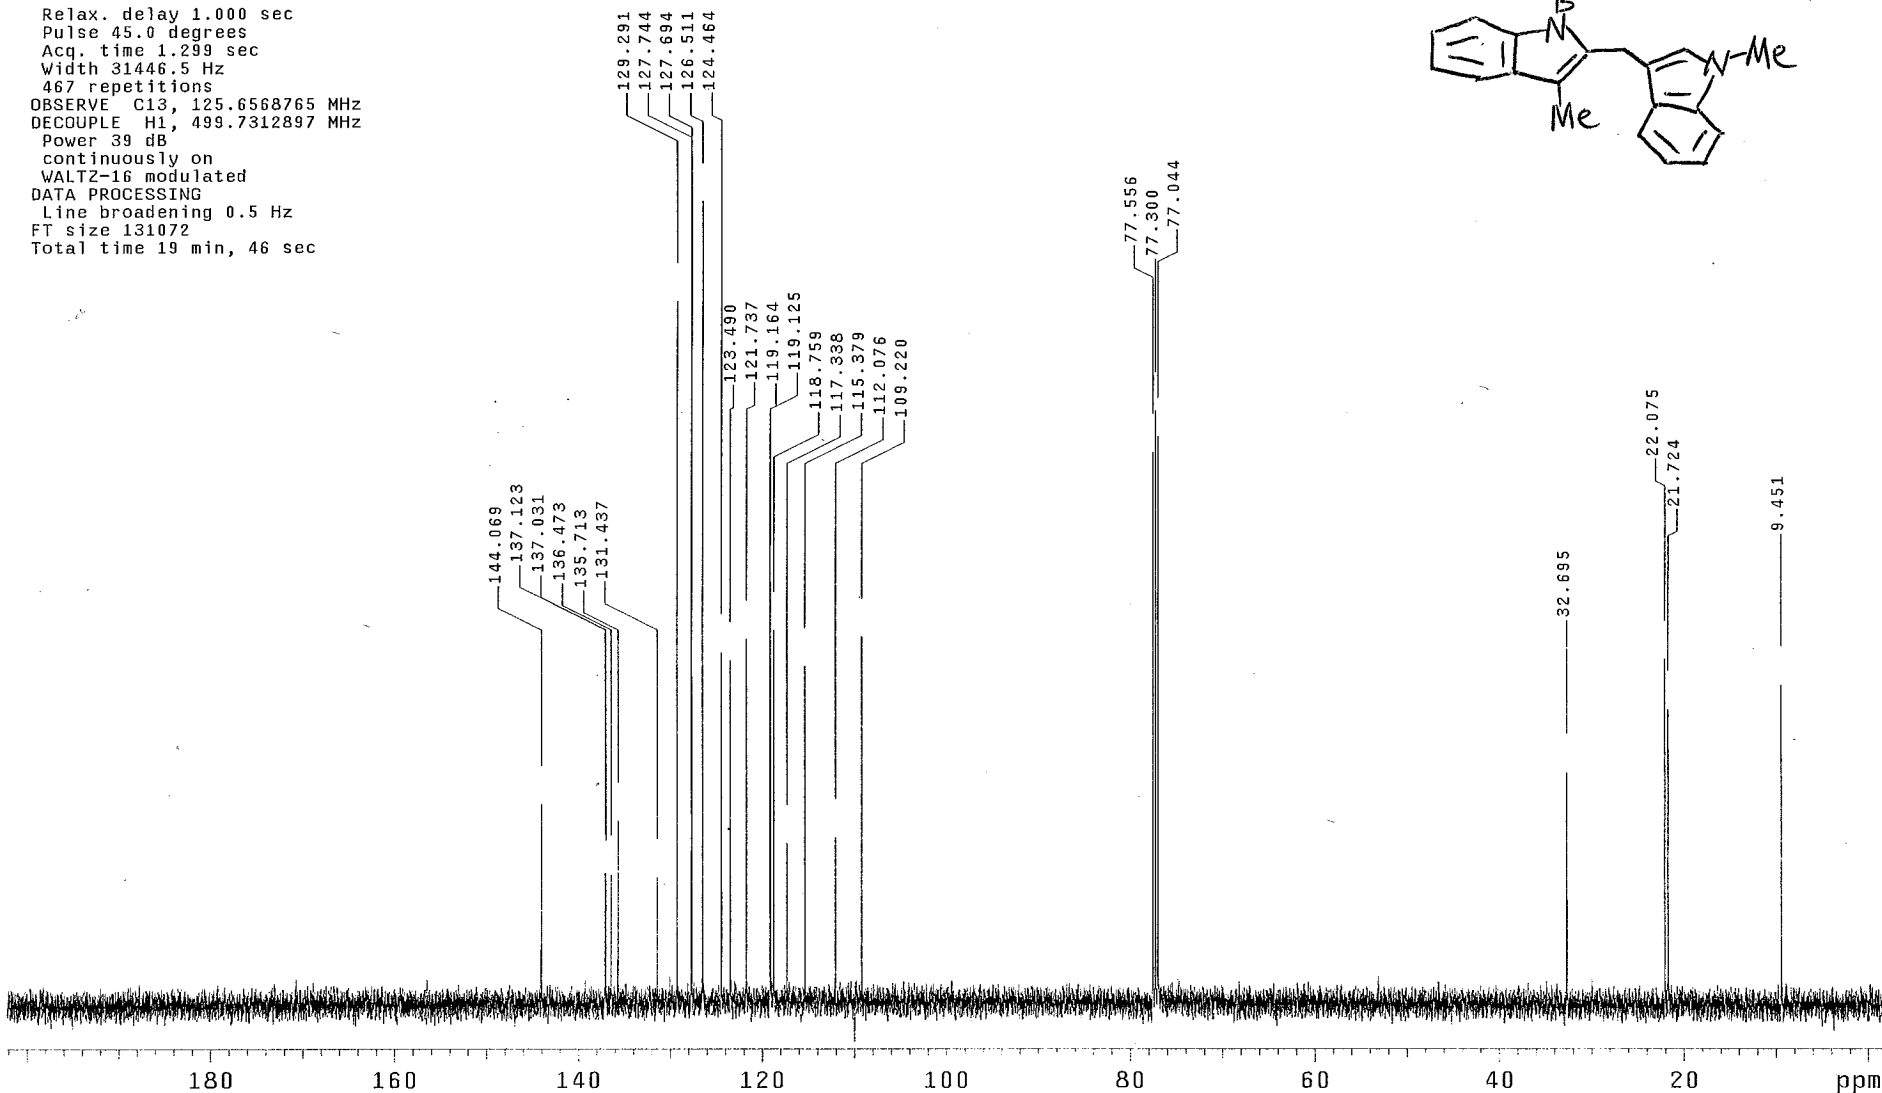

LiH-II-32\_01Jun2014

Archive directory: /export/home/huili/vnmrsys/data  
Sample directory: LiH-II-32\_01Jun2014

Pulse Sequence: s2pul

Solvent: CDCl<sub>3</sub>  
Temp. 25.0 C / 298.1 K  
File: PROTON  
INOVA-500 "nmr03"

Relax. delay 1.000 sec  
Pulse 45.0 degrees  
Acq. time 3.747 sec  
Width 8000.0 Hz  
32 repetitions  
OBSERVE H1, 499.7288239 MHz  
DATA PROCESSING  
Line broadening 0.5 Hz  
FT size 65536  
Total time 2 min, 32 sec

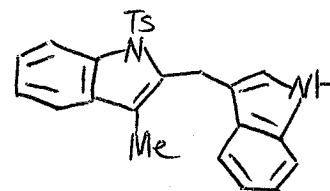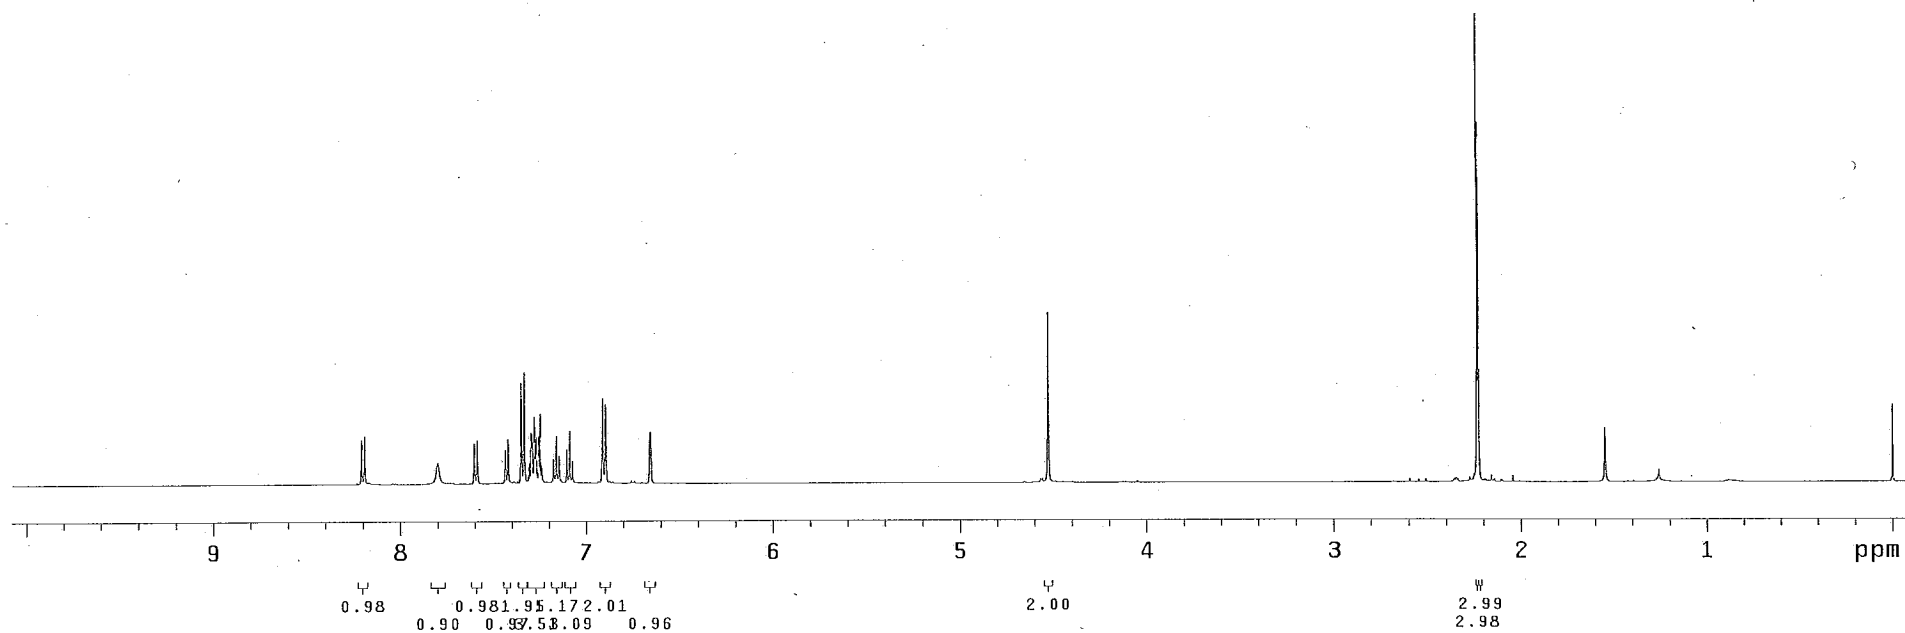

LiH-II-32\_01Jun2014-17:12:16

Archive directory: /export/home/huili/vnmrsys/data  
Sample directory: LiH-II-32\_01Jun2014-17:12:16

Pulse Sequence: s2pu1

Solvent: CDCl3  
Temp. 25.0 C / 298.1 K  
User: 1-14-87  
File: CARBON  
INOVA-500 "nmr03"

Relax. delay 1.000 sec  
Pulse 45.0 degrees  
Acq. time 1.299 sec  
Width 31446.5 Hz  
248 repetitions  
OBSERVE C13, 125.6568760 MHz  
DECOUPLE H1, 499.7312897 MHz  
Power 46 dB  
continuously on  
WALTZ-16 modulated  
DATA PROCESSING  
Line broadening 0.5 Hz  
FT size 131072  
Total time 19 min, 46 sec

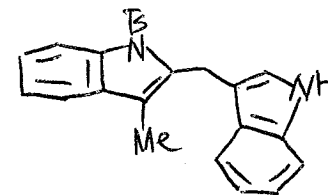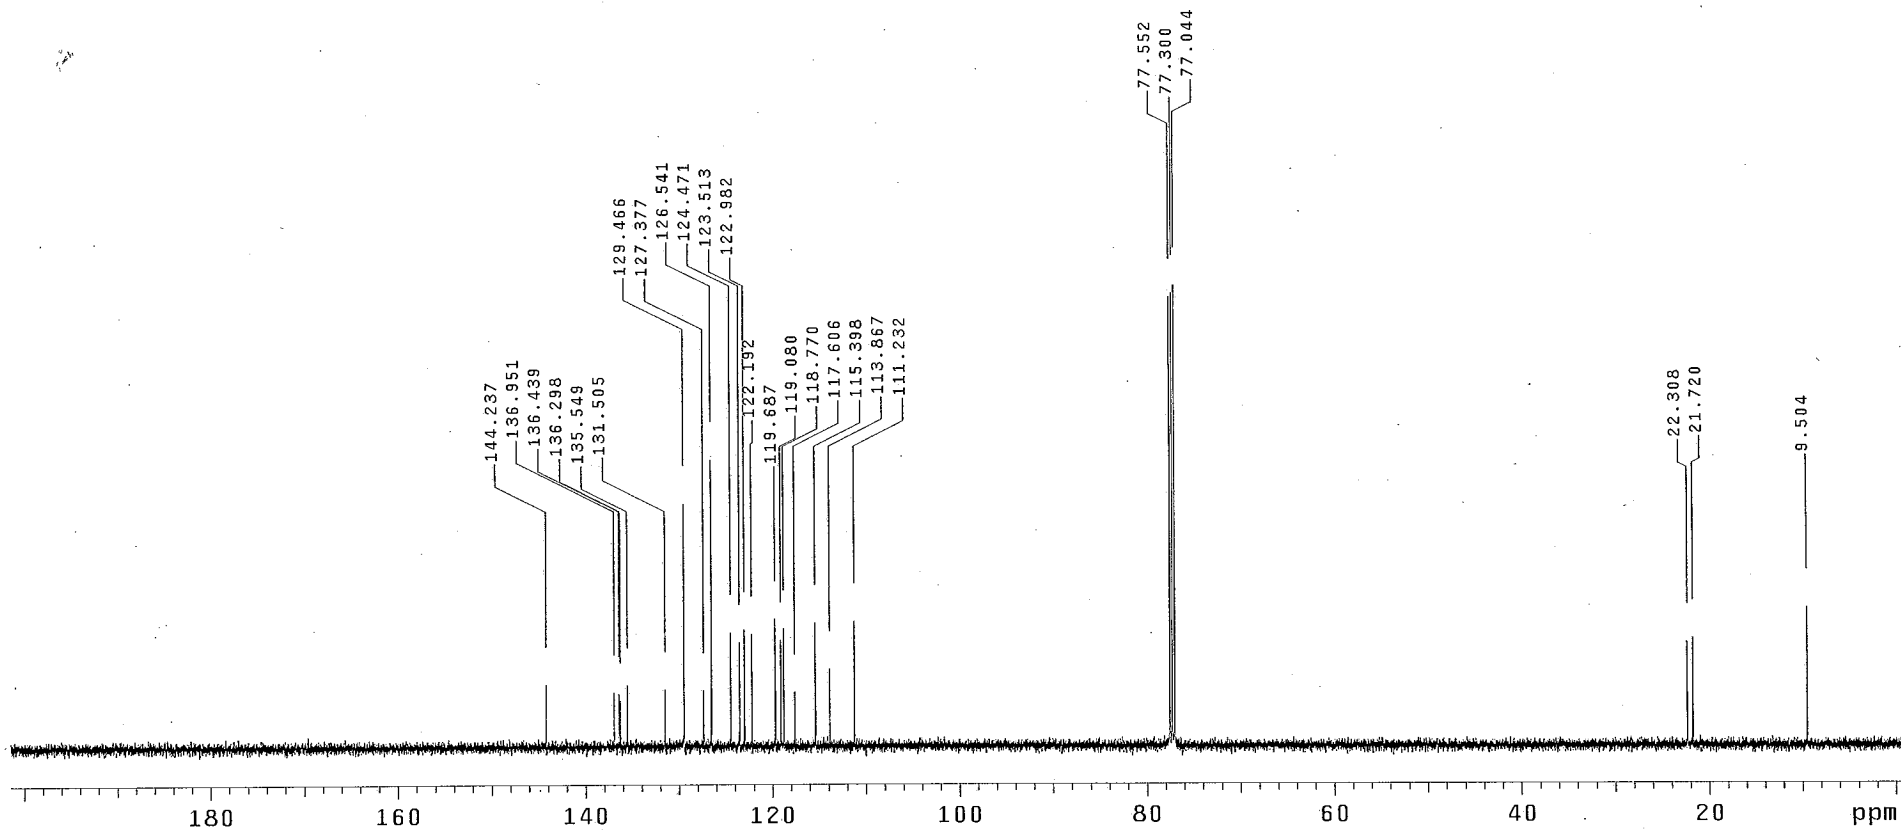



LiH-II-40p\_05Jun2014

Archive directory: /export/home/huili/vnmrsys/data  
Sample directory: LiH-II-40p\_05Jun2014  
File: PROTON

Pulse Sequence: s2pu1

Solvent: CDCl3  
Temp. 25.0 C / 298.1 K  
INNOVA-500 "ui500"

Relax. delay 1.000 sec  
Pulse 45.0 degrees  
Acq. time 3.747 sec  
Width 8000.0 Hz  
32 repetitions  
OBSERVE H1, 499.7288217 MHz  
DATA PROCESSING  
Line broadening 0.5 Hz  
FT size 65536  
Total time 2 min, 32 sec

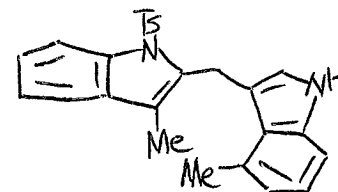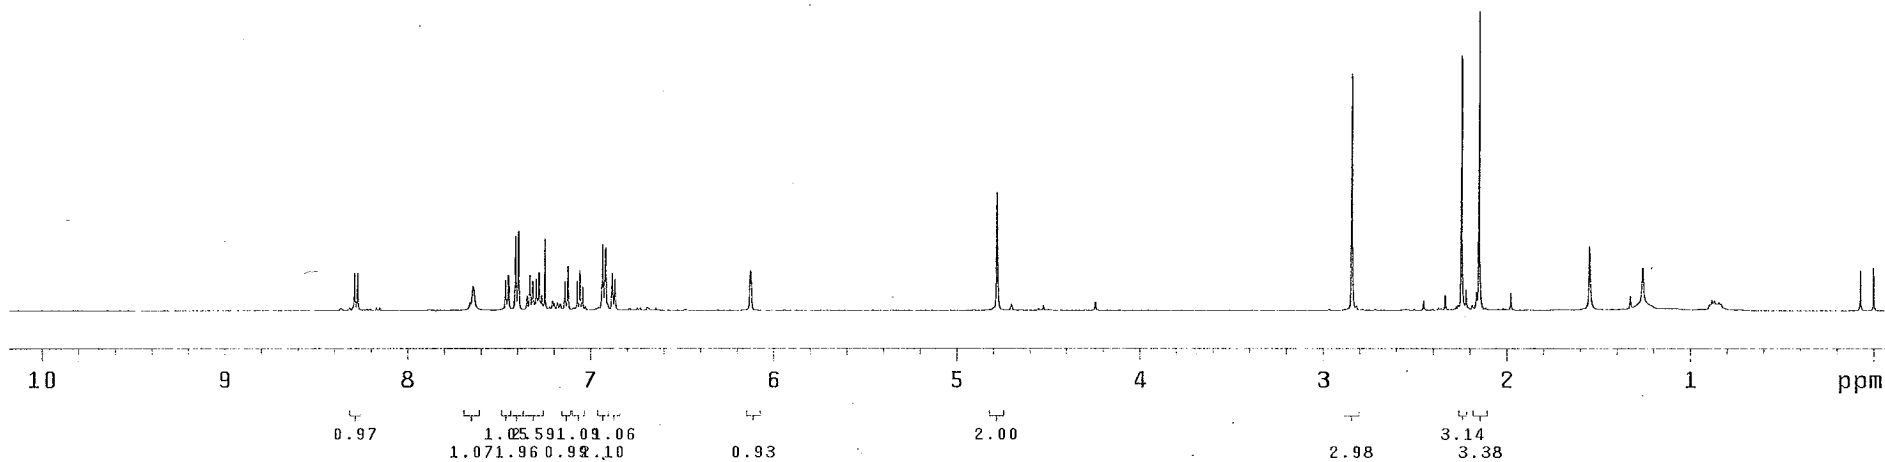

LiH-II-40p\_05Jun2014-16:15:37

Archive directory: /export/home/huili/vnmrsys/data  
Sample directory: LiH-II-40p\_05Jun2014-16:15:37  
File: CARBON

Pulse Sequence: s2pul

Solvent: CDCl3  
Temp. 25.0 C / 298.1 K  
User: 1-14-87  
INOVA-500 "ui500"

Relax. delay 1.000 sec  
Pulse 45.0 degrees  
Acq. time 1.299 sec  
Width 31446.5 Hz  
466 repetitions  
OBSERVE C13, 125.6568746 MHz  
DECOUPLE H1, 499.7312897 MHz  
Power 39 dB  
continuously on  
WALTZ-16 modulated  
DATA PROCESSING  
Line broadening 0.5 Hz  
FT size 131072  
Total time 38 min, 32 sec

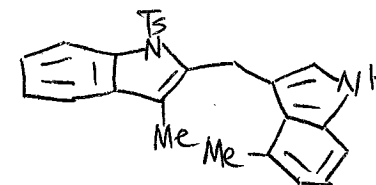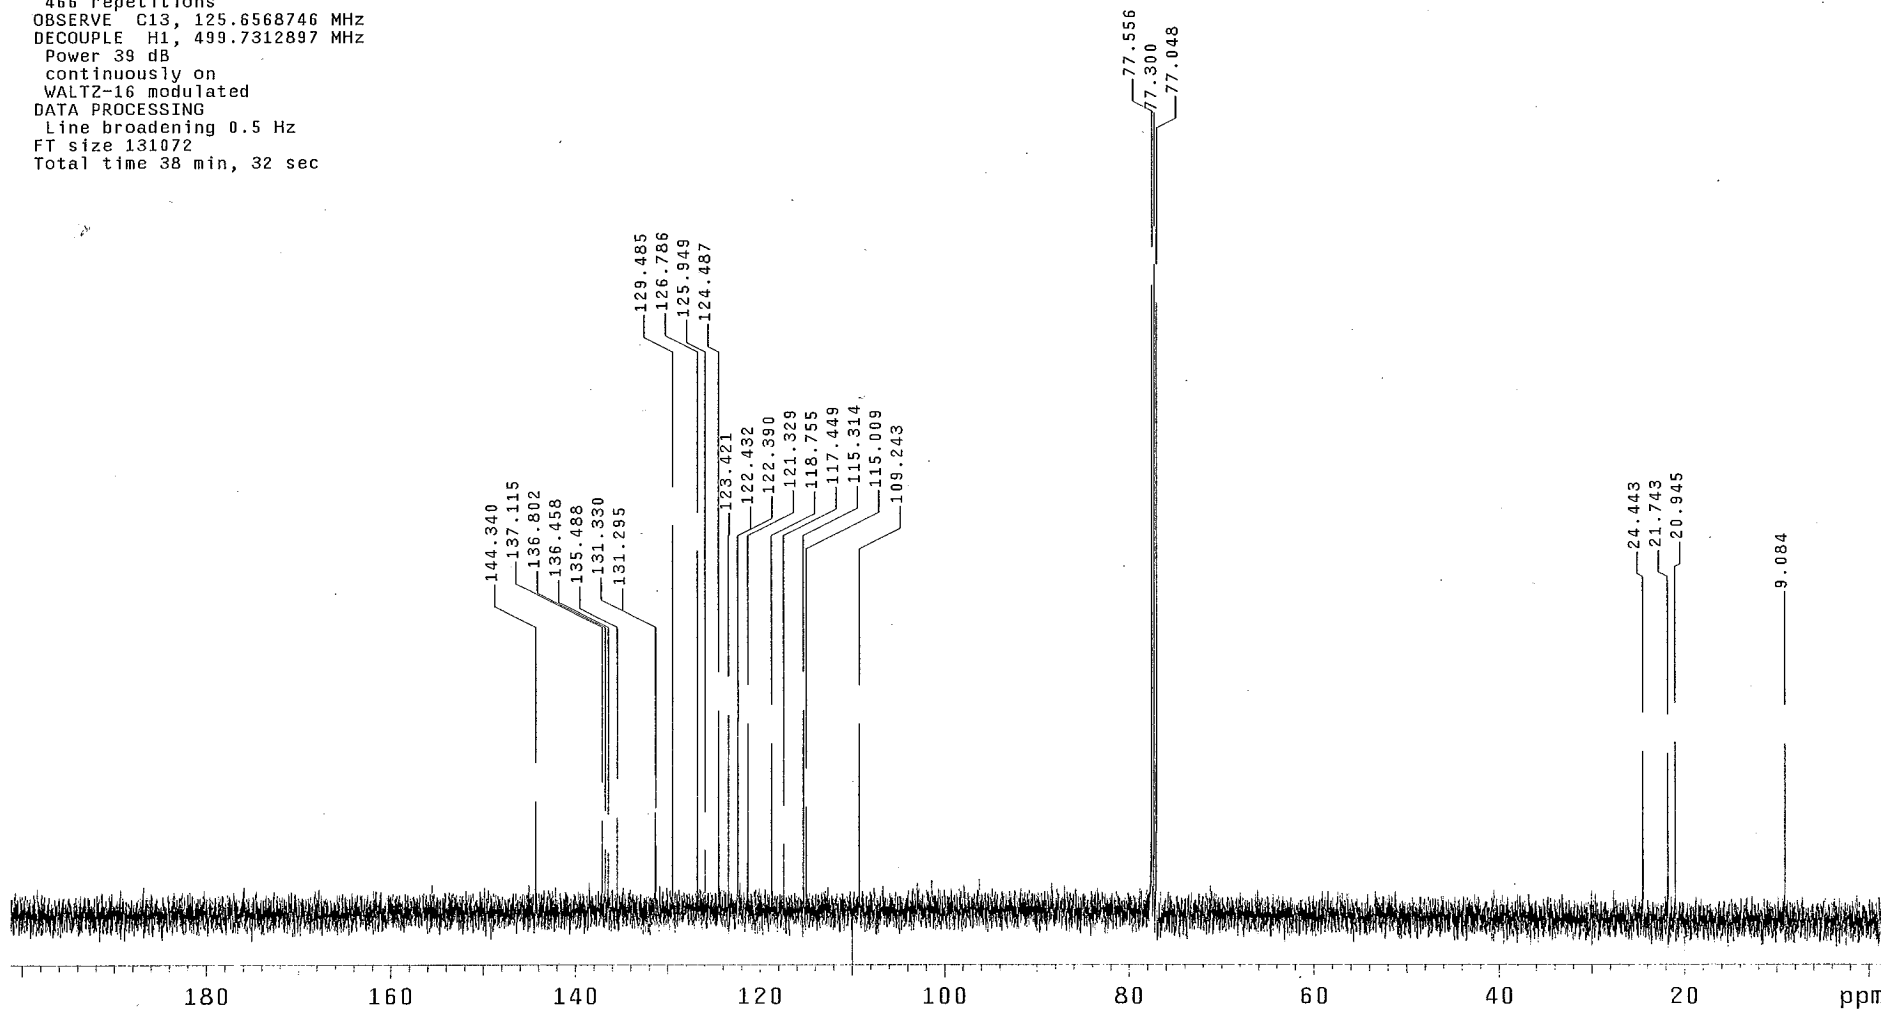

LiH-II-13p\_05Jun2014

Archive directory: /export/home/huili/vnmrsys/data  
Sample directory: LiH-II-13p\_05Jun2014  
File: PROTON

Pulse Sequence: s2pul

Solvent: CDCl3  
Temp. 25.0 C / 298.1 K  
INOVA-500 "ui500"

Relax. delay 1.000 sec  
Pulse 45.0 degrees  
Acq. time 3.747 sec  
Width 8000.0 Hz  
32 repetitions  
OBSERVE H1, 499.7288202 MHz  
DATA PROCESSING  
Line broadening 0.5 Hz  
FT size 65536  
Total time 2 min, 32 sec

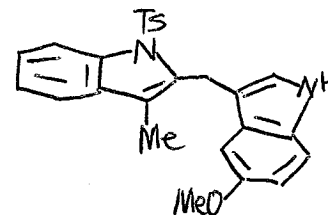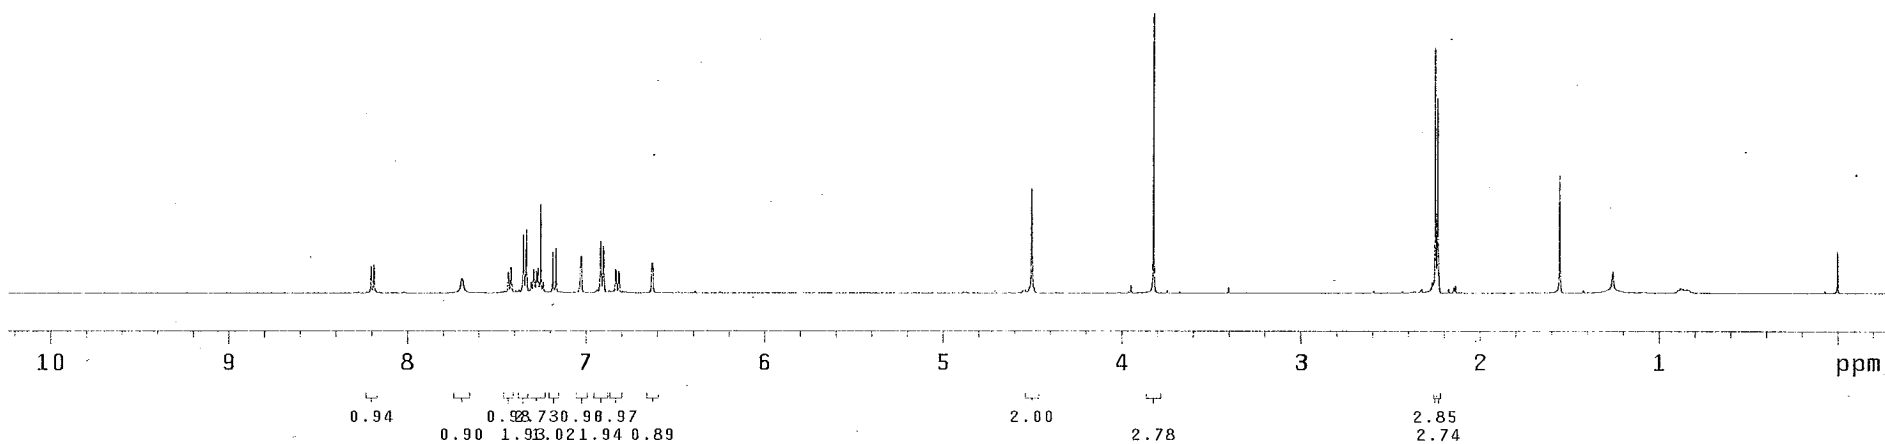

LiH-I-269-2\_24Apr2014

Archive directory: /export/home/huili/vnmrsys/data  
Sample directory: LiH-I-269-2\_24Apr2014

Pulse Sequence: s2pu1

Solvent: CDCl<sub>3</sub>  
Temp. 25.0 C / 298.1 K  
File: CARBON  
INOVA-500 "nmr03"

Relax. delay 1.000 sec  
Pulse 45.0 degrees  
Acq. time 1.197 sec  
Width 25157.2 Hz  
965 repetitions  
OBSERVE C13, 100.5263721 MHz  
DECOUPLE H1, 399.7885243 MHz  
Power 43 dB  
continuously on  
WALTZ-16 modulated  
DATA PROCESSING  
Line broadening 0.8 Hz  
FT size 65536  
Total time 36 min, 45 sec

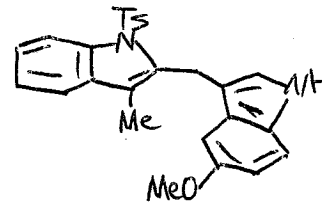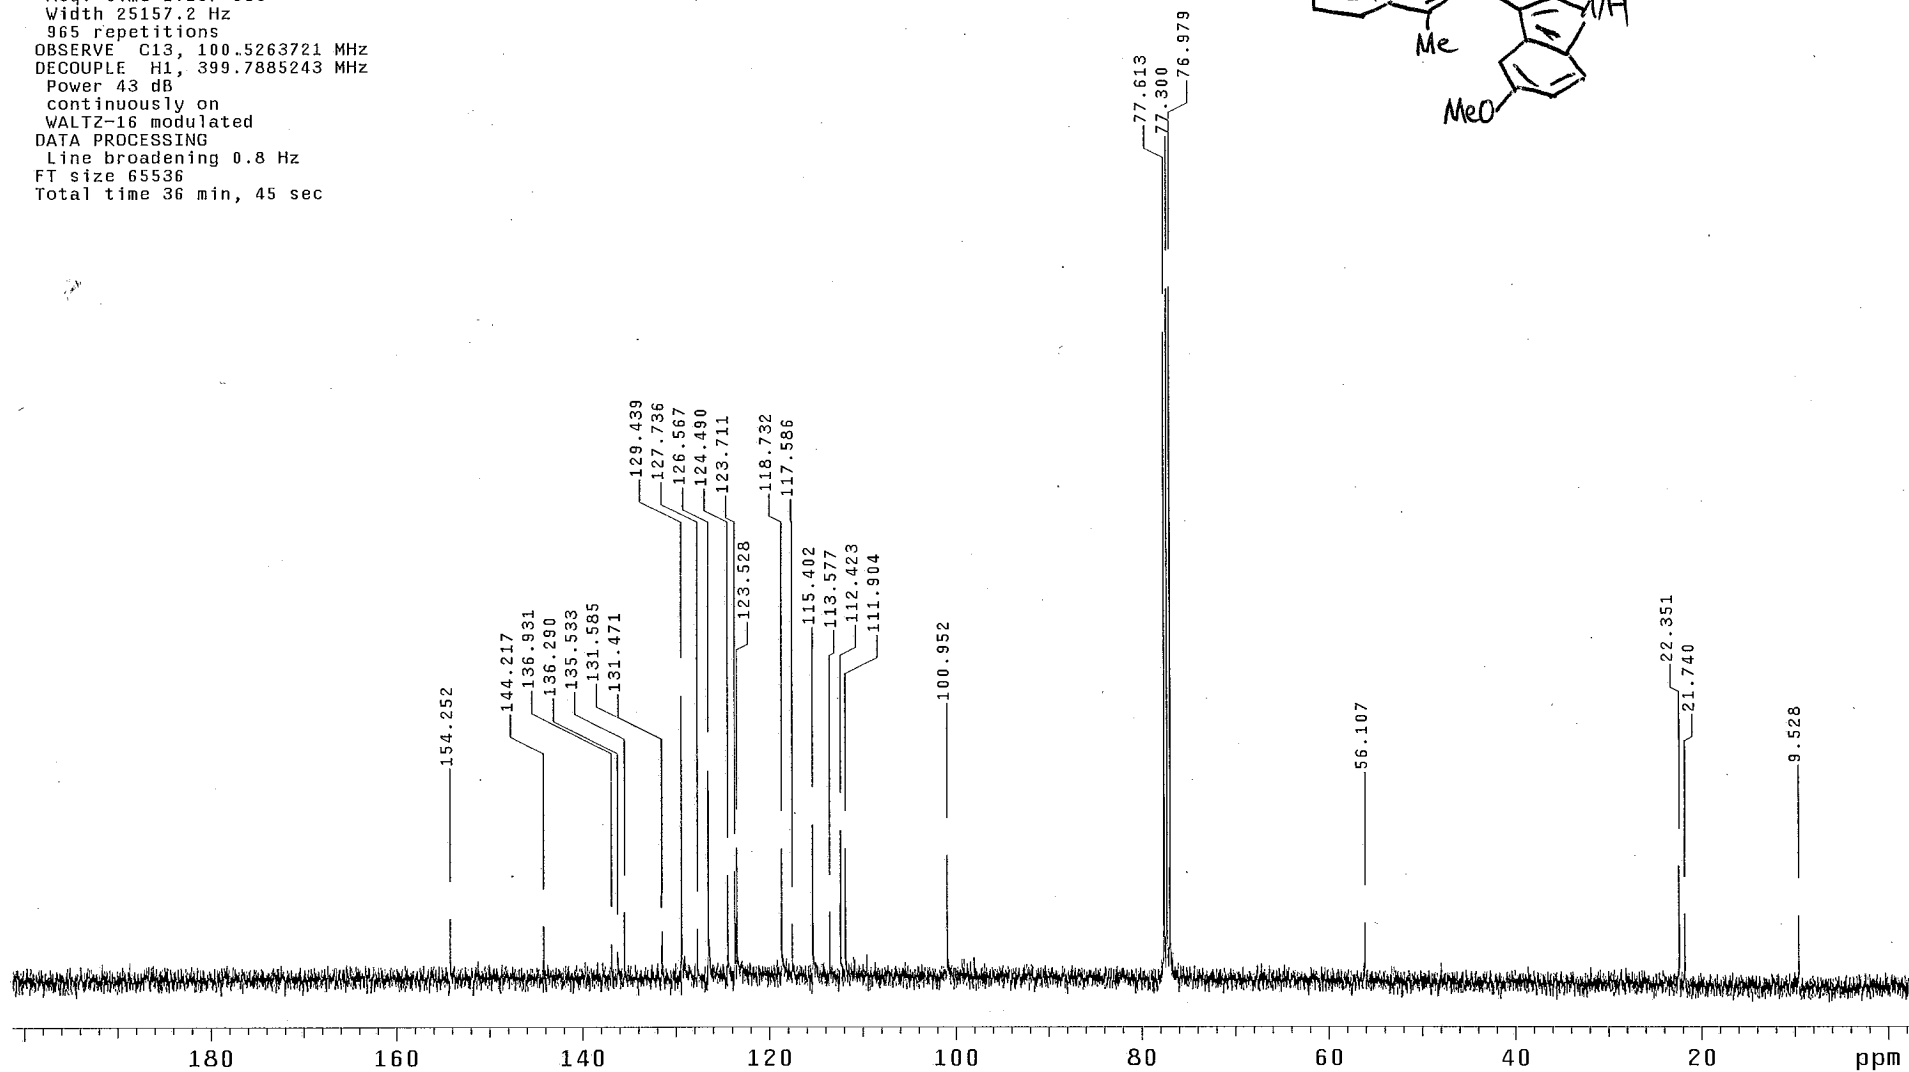

why-2-250-p-proton-2\_09Jul2014

Archive directory: /export/home/haoyuan/vnmrSYS/data  
Sample directory: why-2-250-p-proton-2\_09Jul2014

Pulse Sequence: s2pul

Solvent: CDCl3  
Temp. 25.0 C / 298.1 K  
File: PROTON  
INOVA-500 "nmr03"

Relax. delay 1.000 sec  
Pulse 45.0 degrees  
Acq. time 3.747 sec  
Width 8000.0 Hz  
32 repetitions  
OBSERVE H1, 499.7288205 MHz  
DATA PROCESSING  
Line broadening 0.5 Hz  
FT size 65536  
Total time 2 min, 32 sec

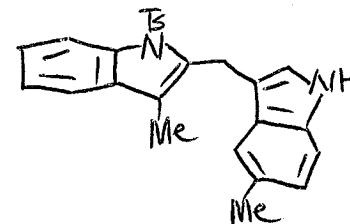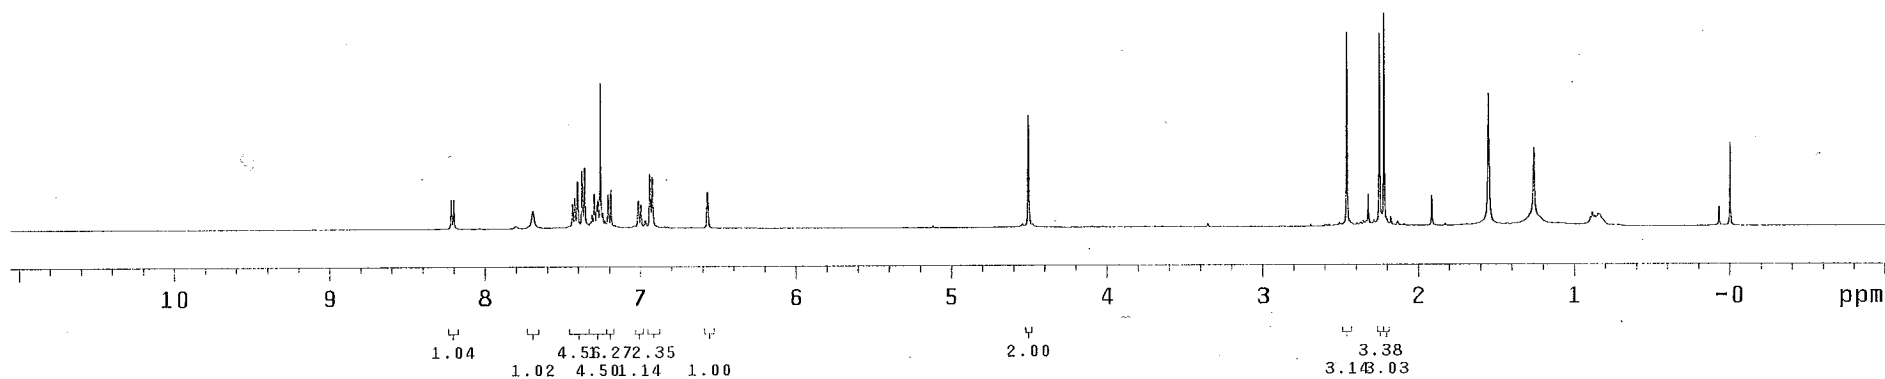

why-2-250-p-carbon\_06Jun2014

Archive directory: /export/home/haoyuan/vnmrsys/data  
Sample directory: why-2-250-p-carbon\_06Jun2014

Pulse Sequence: s2pul

Solvent: CDCl3  
Temp. 25.0 C / 298.1 K  
User: 1-14-87  
File: CARBON  
INOVA-500 "nmr03"

Relax. delay 1.000 sec  
Pulse 45.0 degrees  
Acq. time 1.299 sec  
Width 31446.5 Hz  
900 repetitions  
OBSERVE C13, 125.6568744 MHz  
DECOUPLE H1, 499.7312897 MHz  
Power 46 dB  
continuously on  
WALTZ-16 modulated  
DATA PROCESSING  
Line broadening 0.5 Hz  
FT size 131072  
Total time 3 hr, 12 min, 23 sec

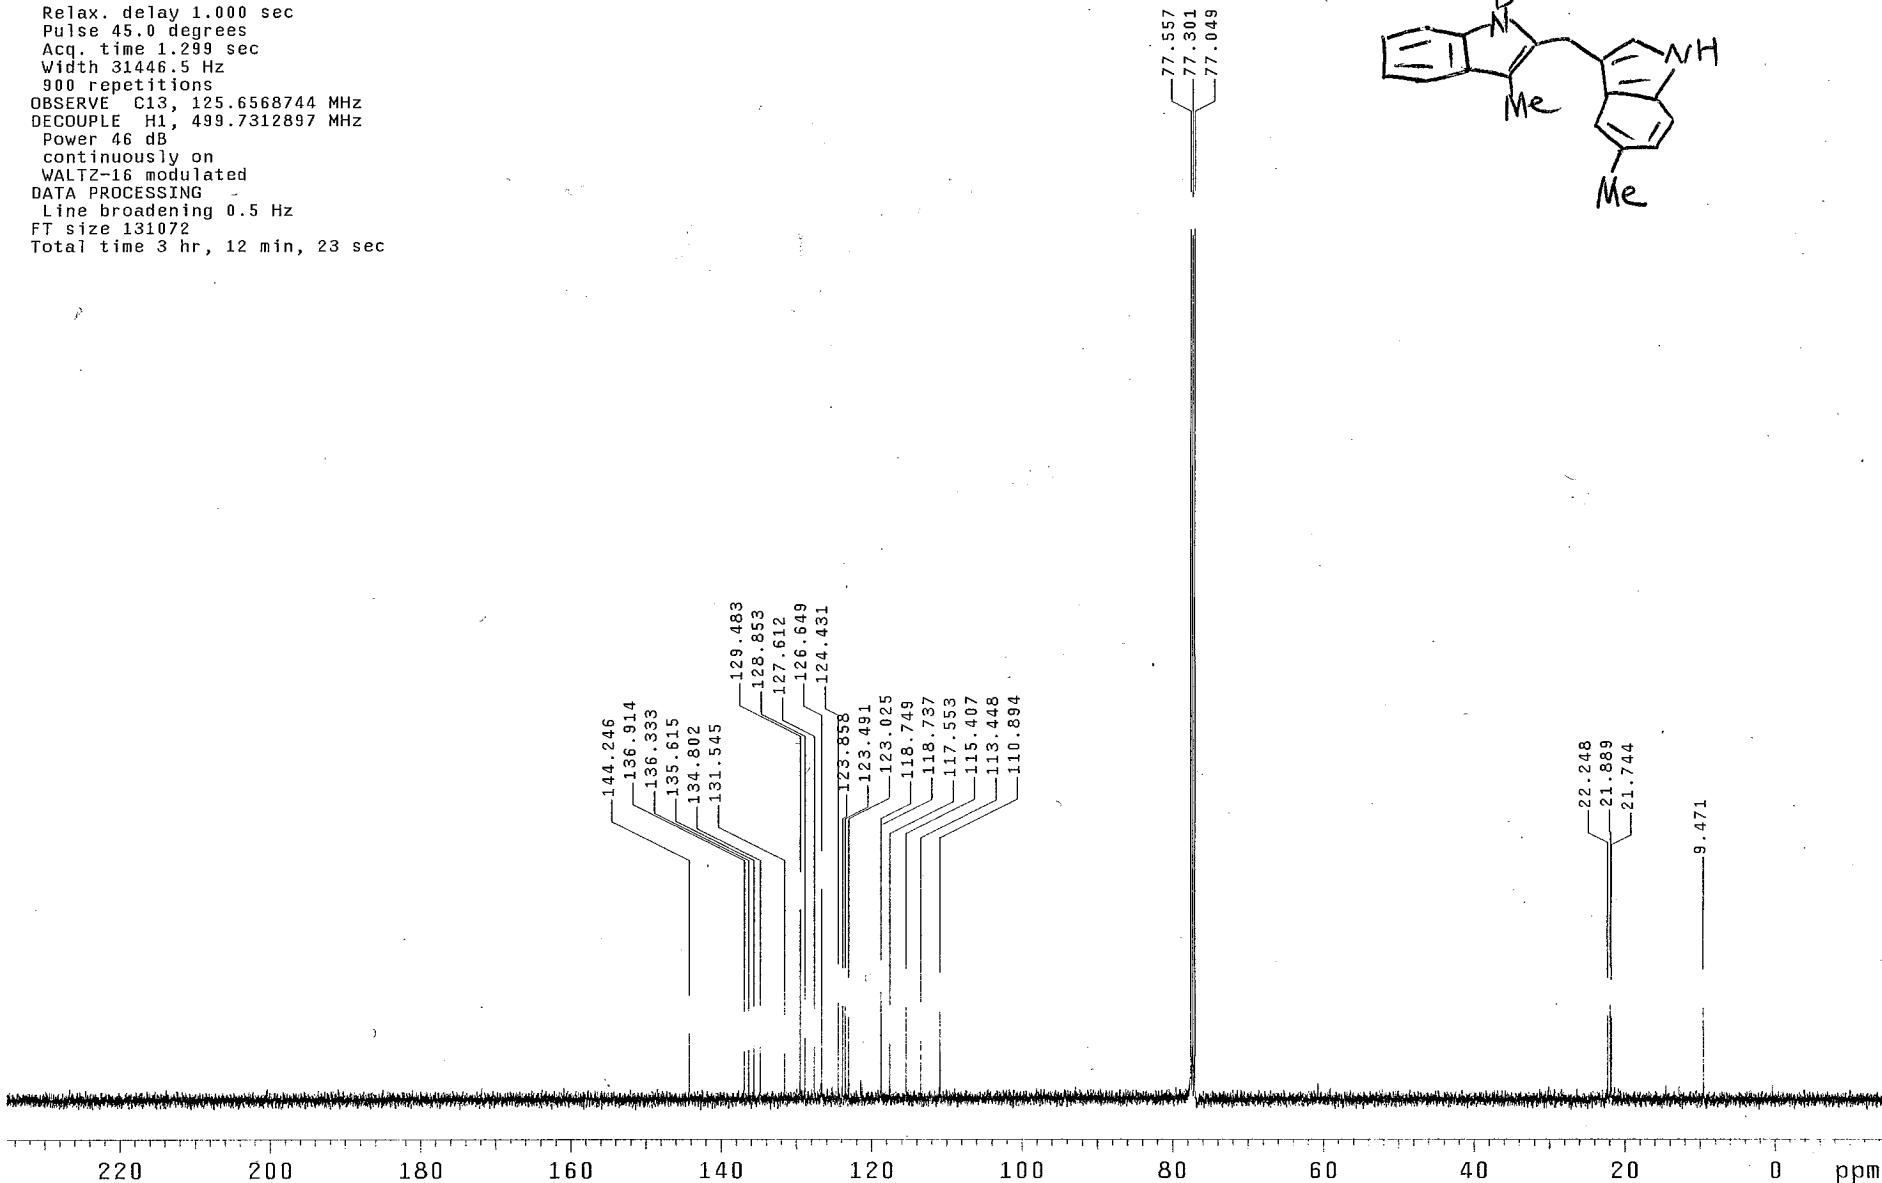

LiH-I-269-3\_23Apr2014

Archive directory: /export/home/huili/vnmrsys/data  
Sample directory: LiH-I-269-3\_23Apr2014

Pulse Sequence: s2pul

Solvent: CDCl3  
Temp. 25.0 C / 298.1 K  
File: PROTON  
INNOVA-500 "nmr03"

Relax. delay 1.000 sec  
Pulse 45.0 degrees  
Acq. time 3.747 sec  
Width 8000.0 Hz  
8 repetitions  
OBSERVE H1, 499.7288200 MHz  
DATA PROCESSING  
Line broadening 0.5 Hz  
FT size 65536  
Total time 0 min, 38 sec

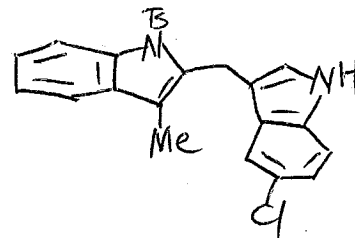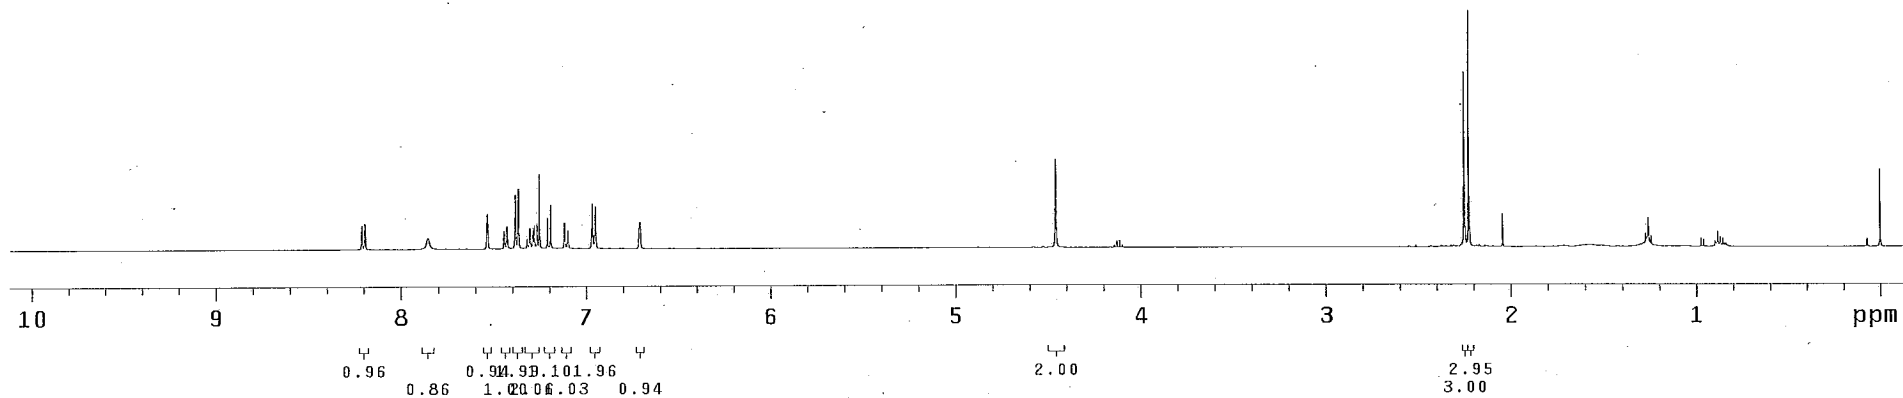

LiH-I-269-3\_23Apr2014

Archive directory: /export/home/huili/vnmrsys/data  
Sample directory: LiH-I-269-3\_23Apr2014

Pulse Sequence: s2pul

Solvent: CDC13  
Temp. 25.0 C / 298.1 K  
File: CARBON  
INNOVA-500 "nmr03"

Relax. delay 1.000 sec  
Pulse 45.0 degrees  
Acq. time 1.197 sec  
Width 25157.2 Hz  
472 repetitions  
OBSERVE C13, 100.5263721 MHz  
DECOUPLE H1, 399.7885243 MHz  
Power 43 dB  
continuously on  
WALTZ-16 modulated  
DATA PROCESSING  
Line broadening 0.8 Hz  
FT size 65536  
Total time 18 min, 49 sec

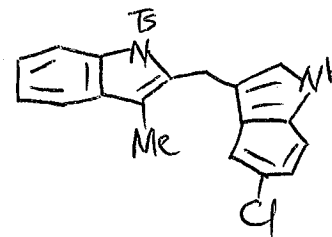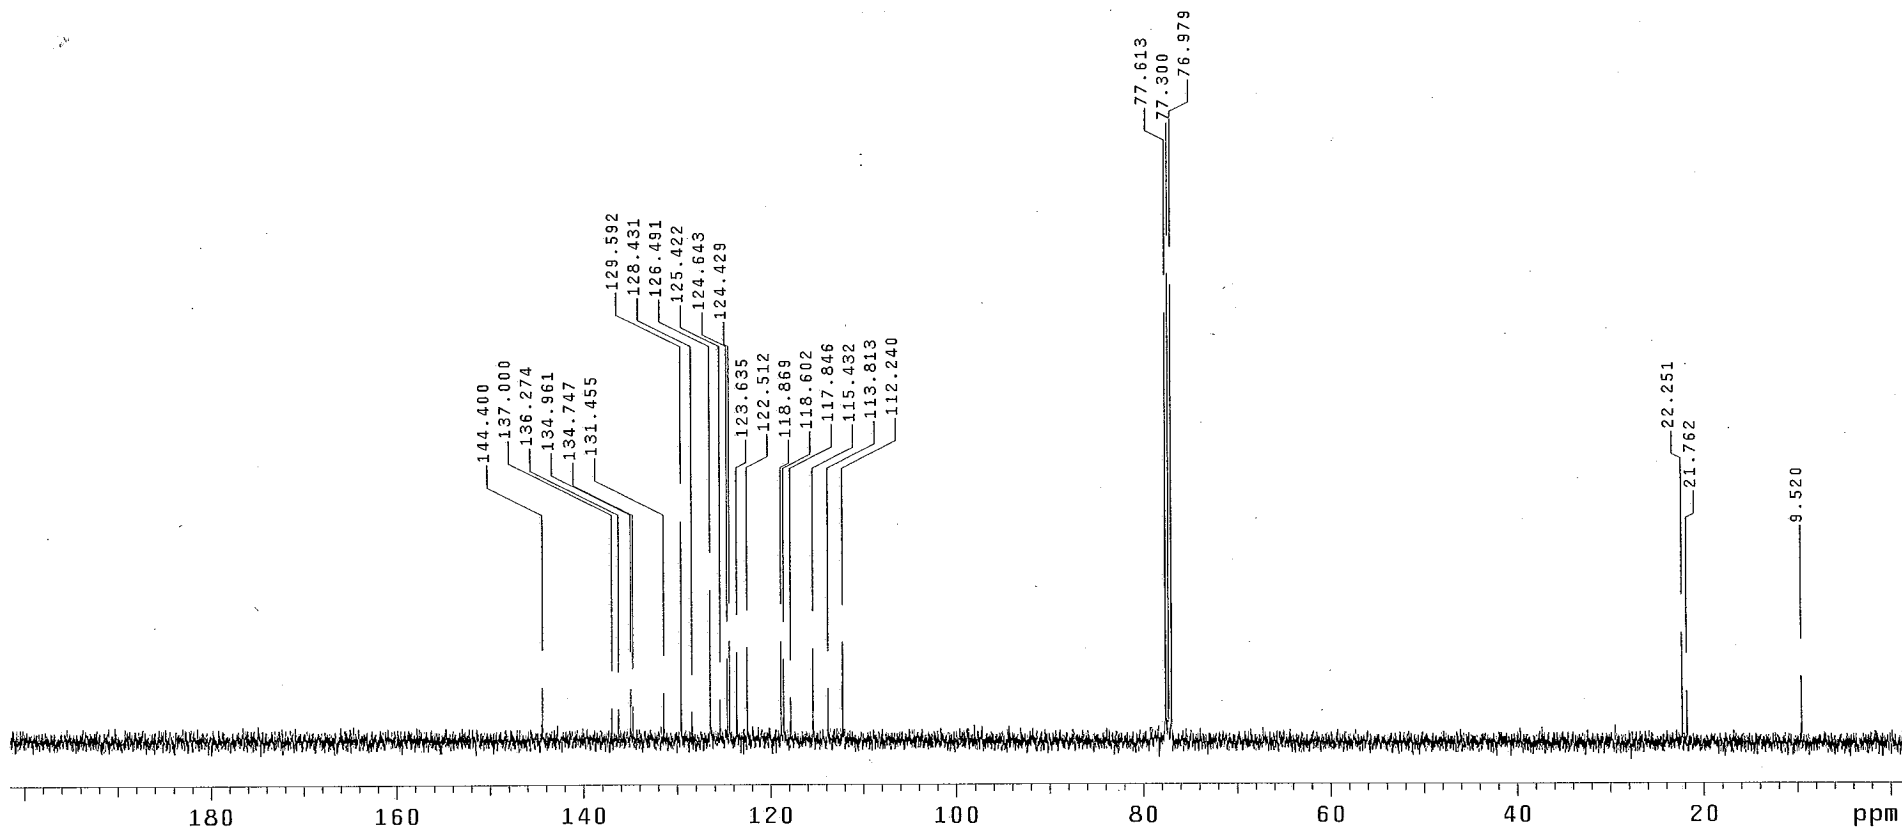



GH-48-1-2\_09Jun2014

Archive directory: /export/home/gabby/vnmrsys/data  
Sample directory: GH-48-1-2\_09Jun2014

Pulse Sequence: s2pu1

Solvent: CDCl3  
Temp. 25.0 C / 298.1 K  
File: PROTON  
INOVA-500 "nmr03"

Relax. delay 1.000 sec  
Pulse 45.0 degrees  
Acq. time 3.747 sec  
Width 8000.0 Hz  
16 repetitions  
OBSERVE H1, 499.7288598 MHz  
DATA PROCESSING  
Line broadening 0.5 Hz  
FT size 65536  
Total time 1 min, 16 sec

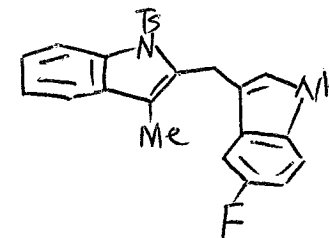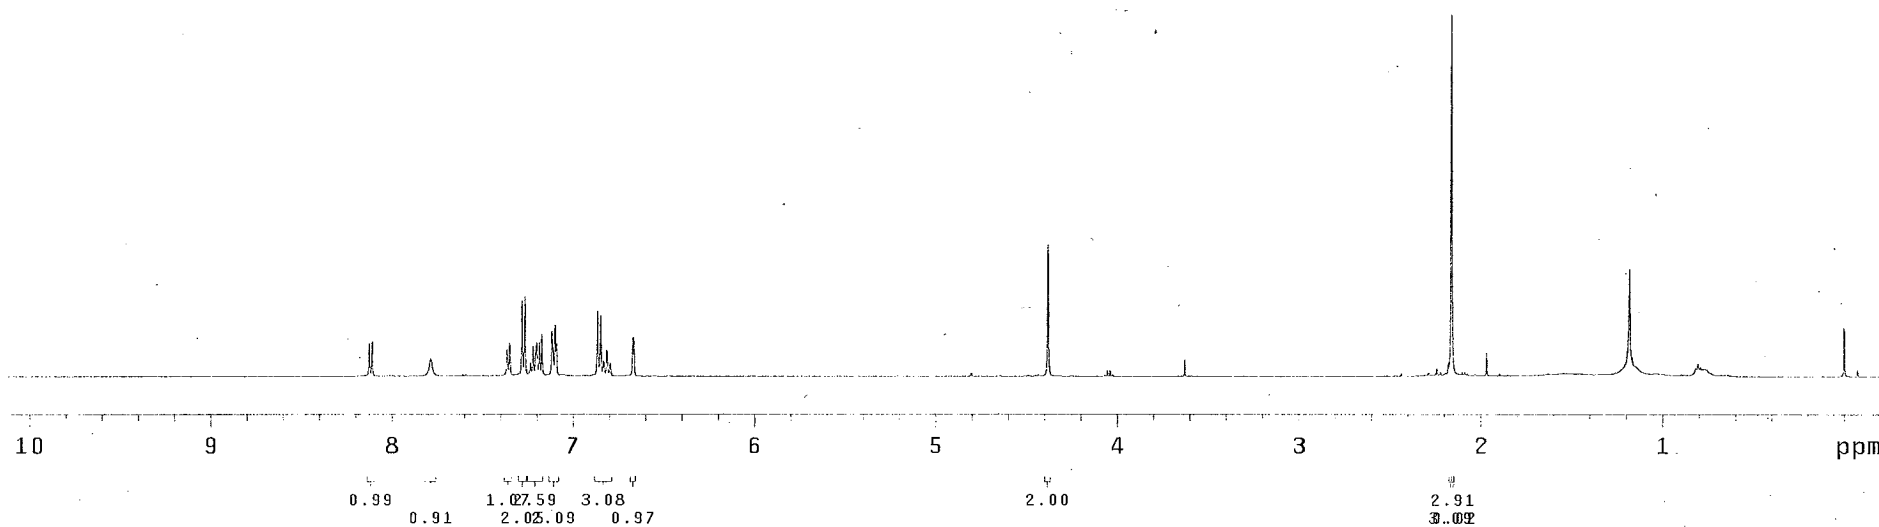

JG-I-48-3C\_10Jul2014

Archive directory: /export/home/gabby/vnmrsys/data  
Sample directory: JG-I-48-3C\_10Jul2014

Pulse Sequence: s2pul

Solvent: CDCl3  
Temp. 25.0 C / 298.1 K  
File: CARBON  
INNOVA-500 "nmr03"

Relax. delay 1.000 sec  
Pulse 45.0 degrees  
Acq. time 1.197 sec  
Width 25157.2 Hz  
512 repetitions  
OBSERVE C13, 100.5263721 MHz  
DECOUPLE H1, 399.7885243 MHz  
Power 43 dB  
continuously on  
WALTZ-16 modulated  
DATA PROCESSING  
Line broadening 0.8 Hz  
FT size 65536  
Total time 18 min, 49 sec

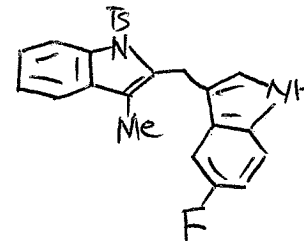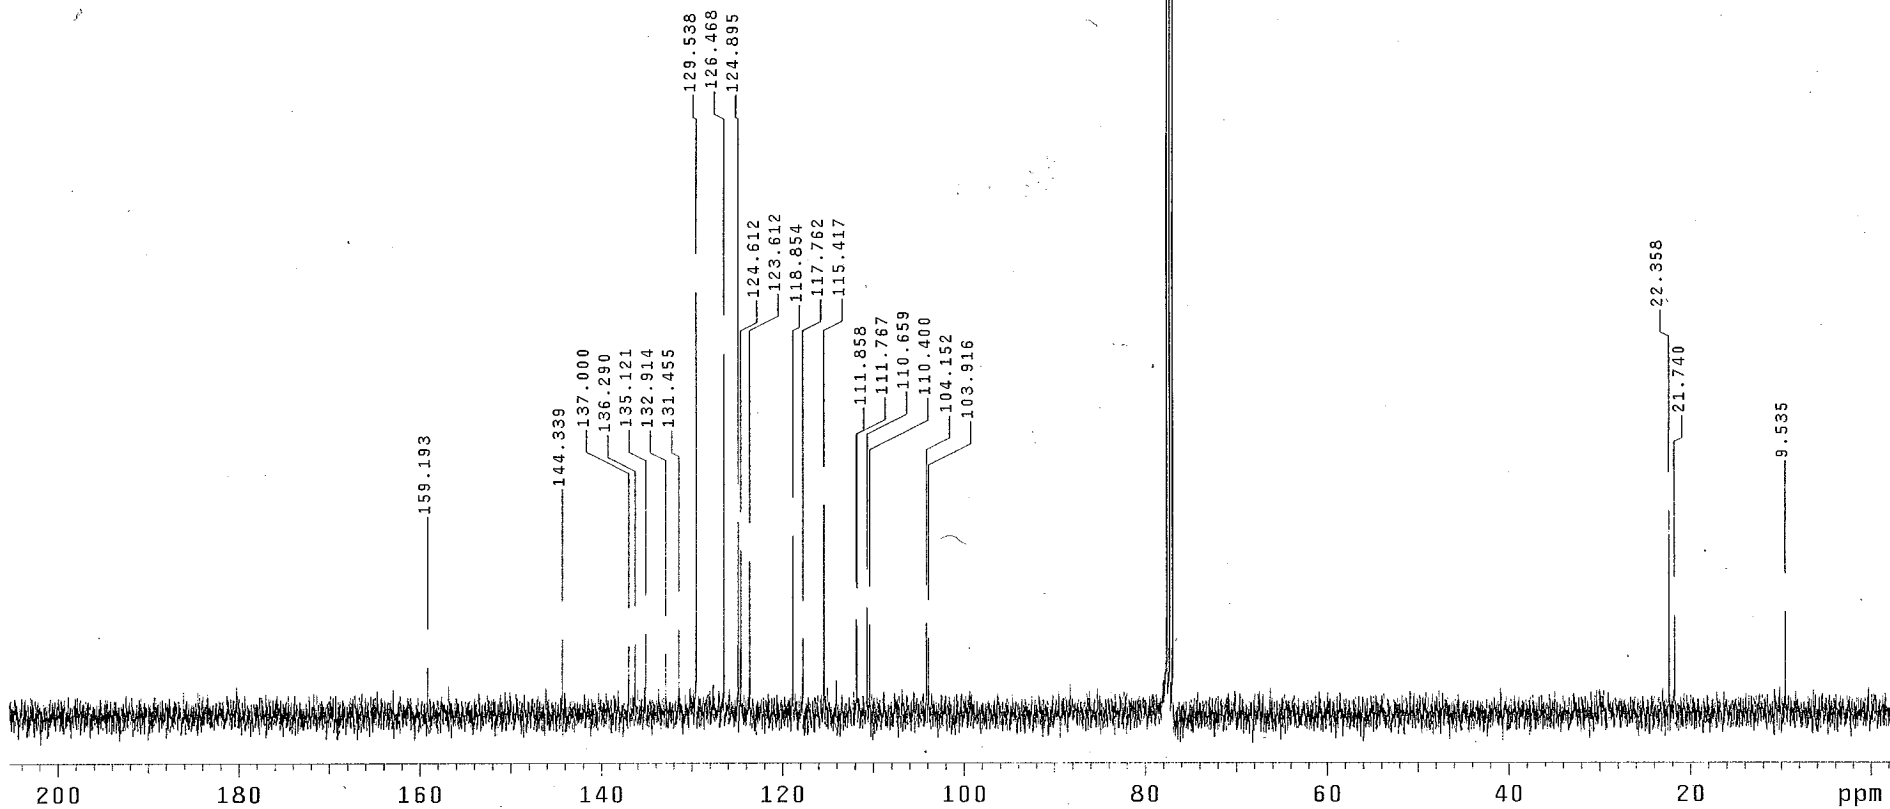

LiH-II-39p\_05Jun2014

Archive directory: /export/home/huili/vnmrsys/data  
Sample directory: LiH-II-39p\_05Jun2014  
File: PROTON

Pulse Sequence: s2pul

Solvent: CDCl3  
Temp. 25.0 C / 298.1 K  
INOVA-500 "ui500"

Relax. delay 1.000 sec  
Pulse 45.0 degrees  
Acq. time 3.747 sec  
Width 8000.0 Hz  
32 repetitions  
OBSERVE H1, 499.7288217 MHz  
DATA PROCESSING  
Line broadening 0.5 Hz  
FT size 65536  
Total time 2 min, 32 sec

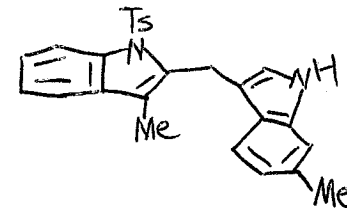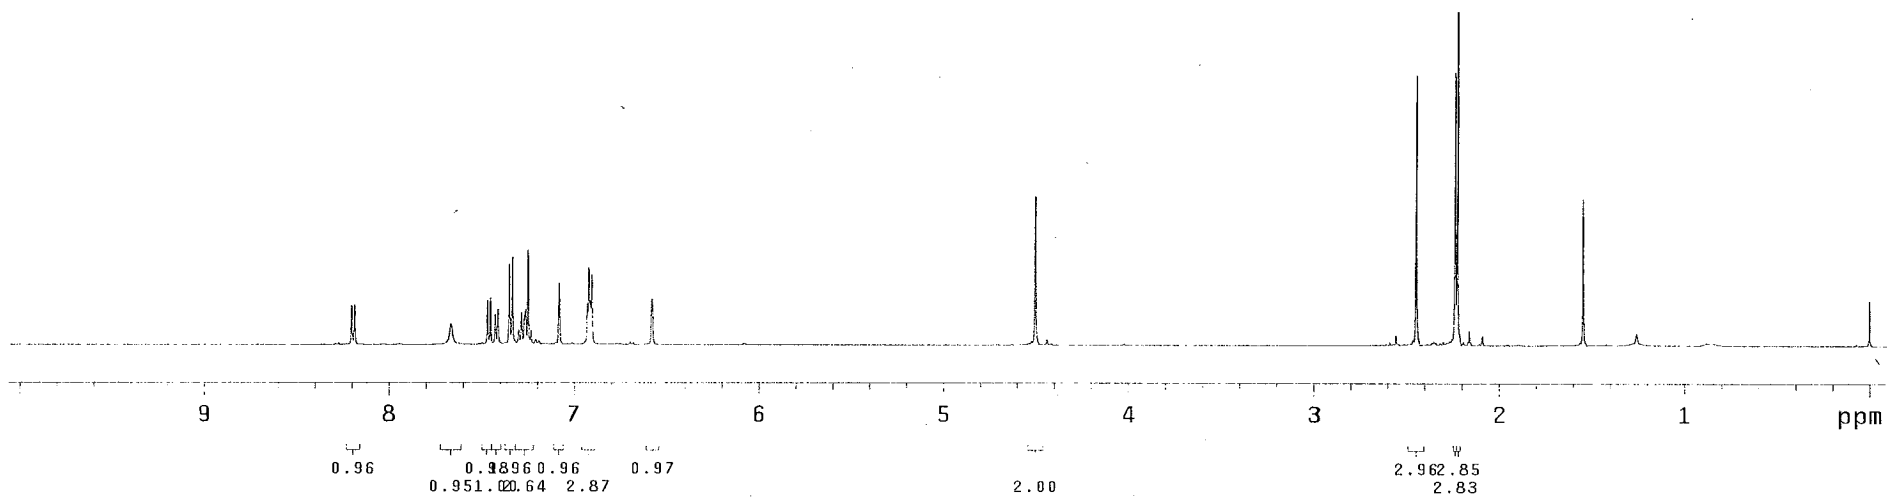

LiH-II-39p\_05Jun2014-15:36:42

Archive directory: /export/home/huili/vnmrsys/data  
Sample directory: LiH-II-39p\_05Jun2014-15:36:42  
File: CARBON

Pulse Sequence: s2pul

Solvent: CDCl3  
Temp. 25.0 C / 298.1 K  
User: 1-14-87  
INOVA-500 "ui500"

Relax. delay 1.000 sec  
Pulse 45.0 degrees  
Acq. time 1.299 sec  
Width 31446.5 Hz  
535 repetitions  
OBSERVE C13, 125.6568746 MHz  
DECOUPLE H1, 499.7312897 MHz  
Power 39 dB  
continuously on  
WALTZ-16 modulated  
DATA PROCESSING  
Line broadening 0.5 Hz  
FT size 131072  
Total time 38 min, 32 sec

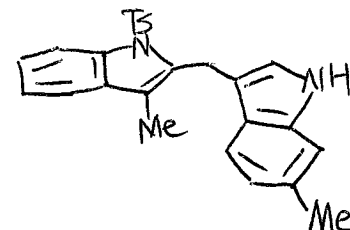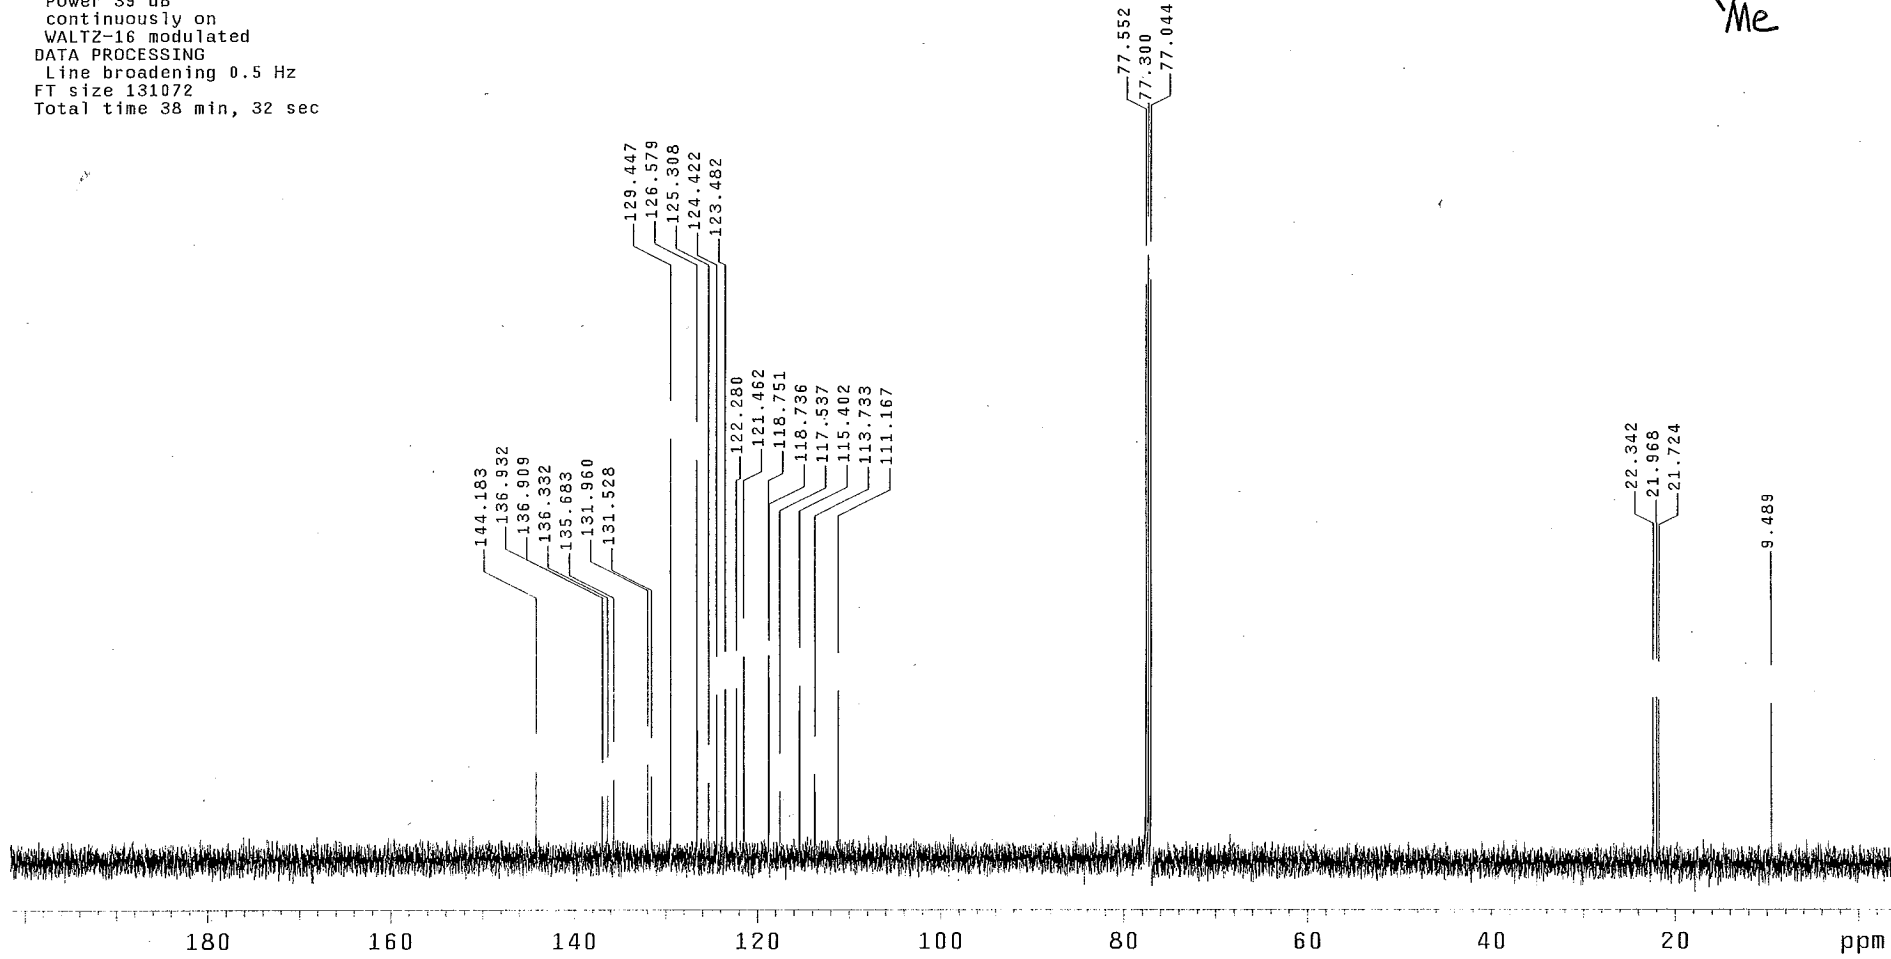

LiH-II-47p\_27Jun2014

Archive directory: /export/home/huili/vnmrsys/data  
Sample directory: LiH-II-47p\_27Jun2014  
File: PROTON

Pulse Sequence: s2pul

Solvent: CDCl3  
Temp. 25.0 C / 298.1 K  
INOVA-400 "ui400"

Relax. delay 1.000 sec  
Pulse 45.0 degrees  
Acq. time 3.754 sec  
Width 6387.7 Hz  
16 repetitions  
OBSERVE H1, 399.7865249 MHz  
DATA PROCESSING  
FT size 65536  
Total time 1 min, 35 sec

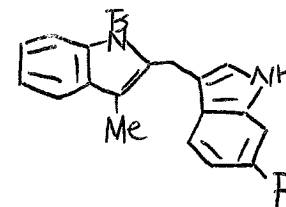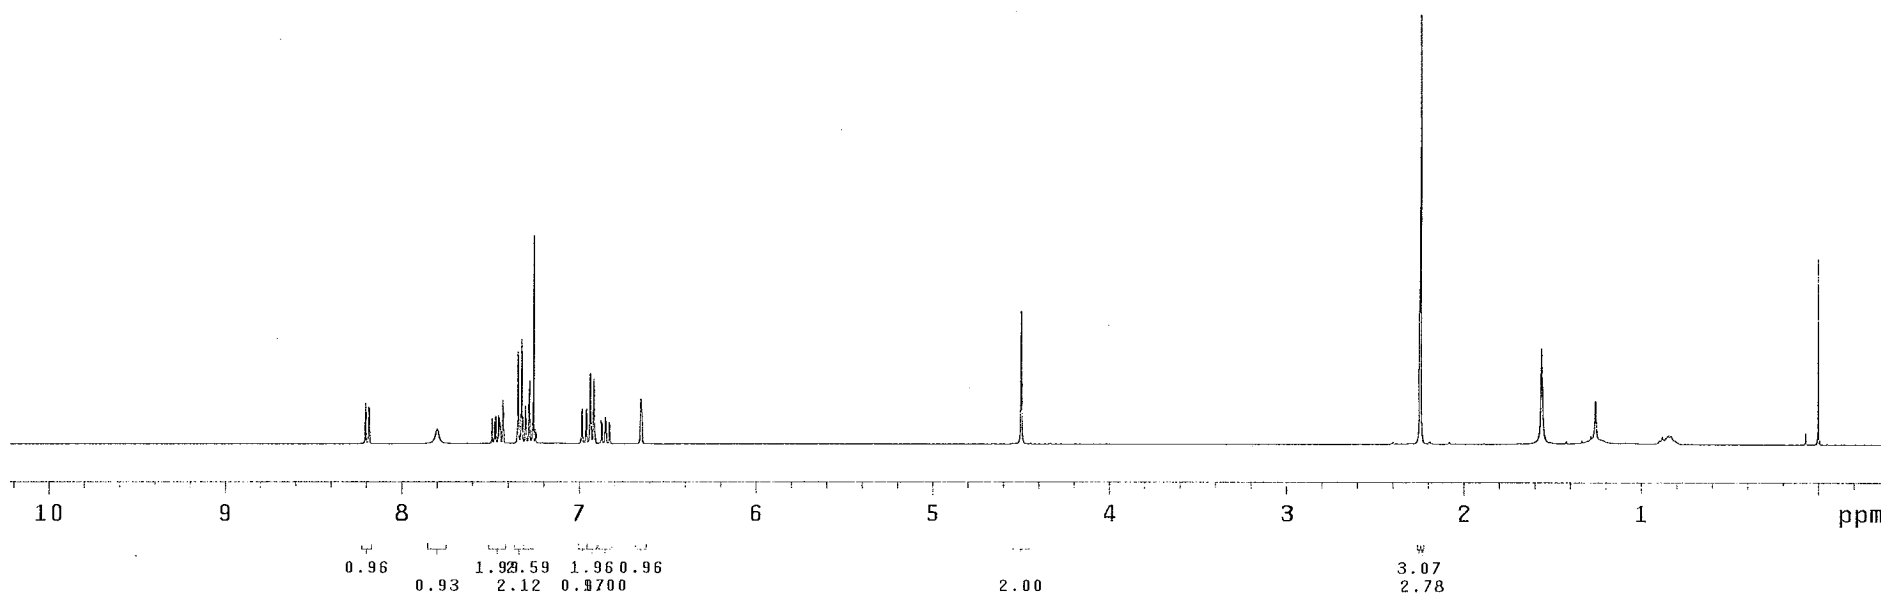

LiH-II-47p\_25Jun2014-13:42:22

Archive directory: /export/home/huili/vnmrsys/data  
Sample directory: LiH-II-47p\_25Jun2014-13:42:22

Pulse Sequence: s2pu1

Solvent: CDC13  
Temp. 25.0 C / 298.1 K  
File: CARBON  
INNOVA-500 "nmr03"

Relax. delay 1.000 sec  
Pulse 45.0 degrees  
Acq. time 1.197 sec  
Width 25157.2 Hz  
1679 repetitions  
OBSERVE C13, 100.5263713 MHz  
DECOUPLE H1, 399.7885243 MHz  
Power 43 dB  
continuously on  
WALTZ-16 modulated  
DATA PROCESSING  
Line broadening 0.8 Hz  
FT size 65536  
Total time 1 hr, 13 min, 31 sec

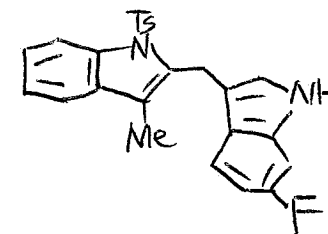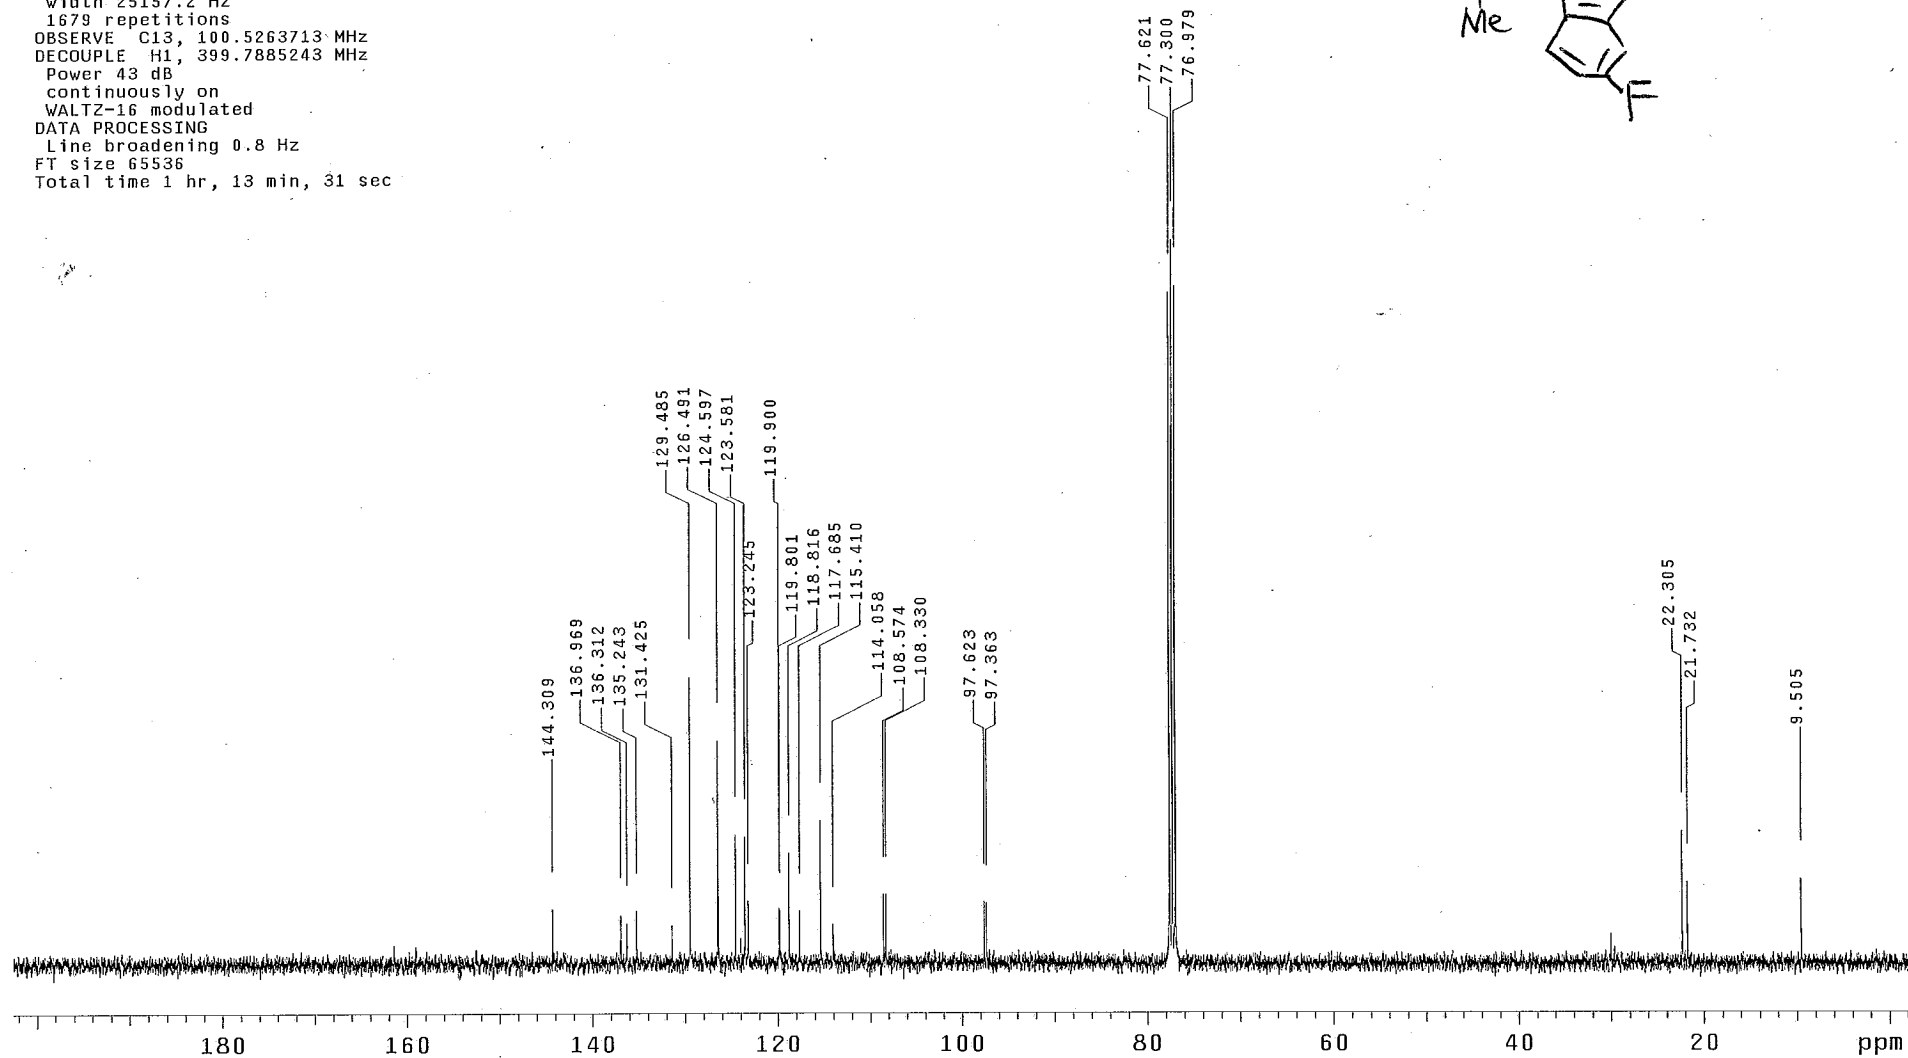

why-2-249-p-proton\_09Jul2014

Archive directory: /export/home/haoyuan/vnmrSYS/data  
Sample directory: why-2-249-p-proton\_09Jul2014

Pulse Sequence: s2pul

Solvent: CDCl3  
Temp. 25.0 C / 298.1 K  
File: PROTON  
INOVA-500 "nmr03"

Relax. delay 1.000 sec  
Pulse 45.0 degrees  
Acq. time 3.747 sec  
Width 8000.0 Hz  
32 repetitions  
OBSERVE H1, 499.7288256 MHz  
DATA PROCESSING  
Line broadening 0.5 Hz  
FT size 65536  
Total time 2 min, 32 sec

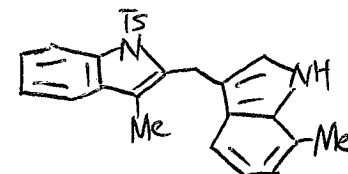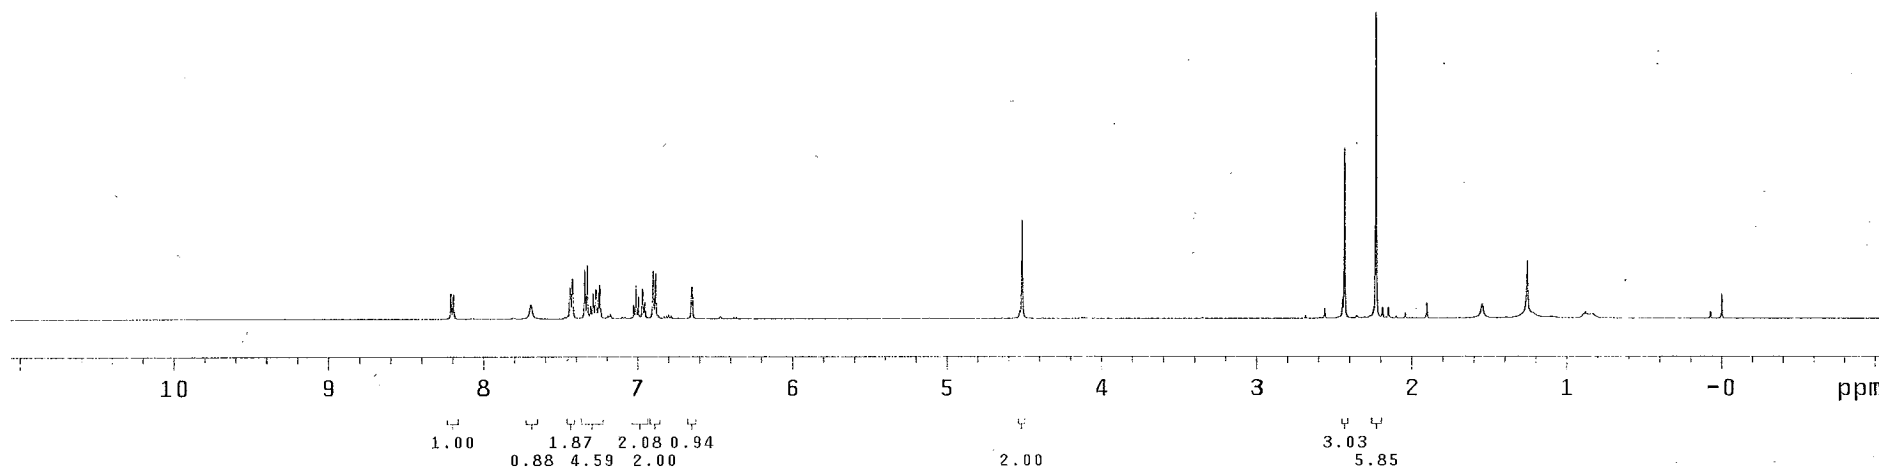

LiH-WHY-249\_10Jul2014

Archive directory: /export/home/huili/vnmrsys/data  
Sample directory: LiH-WHY-249\_10Jul2014  
File: CARBON

Pulse Sequence: s2pu1

Solvent: CDCl3  
Temp. 25.0 C / 298.1 K  
INOVA-400 "ui400"

Relax. delay 1.000 sec  
Pulse 45.0 degrees  
Acq. time 1.197 sec  
Width 25157.2 Hz  
1474 repetitions  
OBSERVE C13, 100.5263713 MHz  
DECOUPLE H1, 399.7885243 MHz  
Power 43 dB  
continuously on  
WALTZ-16 modulated  
DATA PROCESSING  
Line broadening 0.8 Hz  
FT size 65536  
Total time 1 hr, 13 min, 31 sec

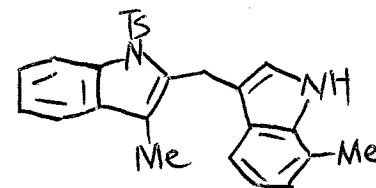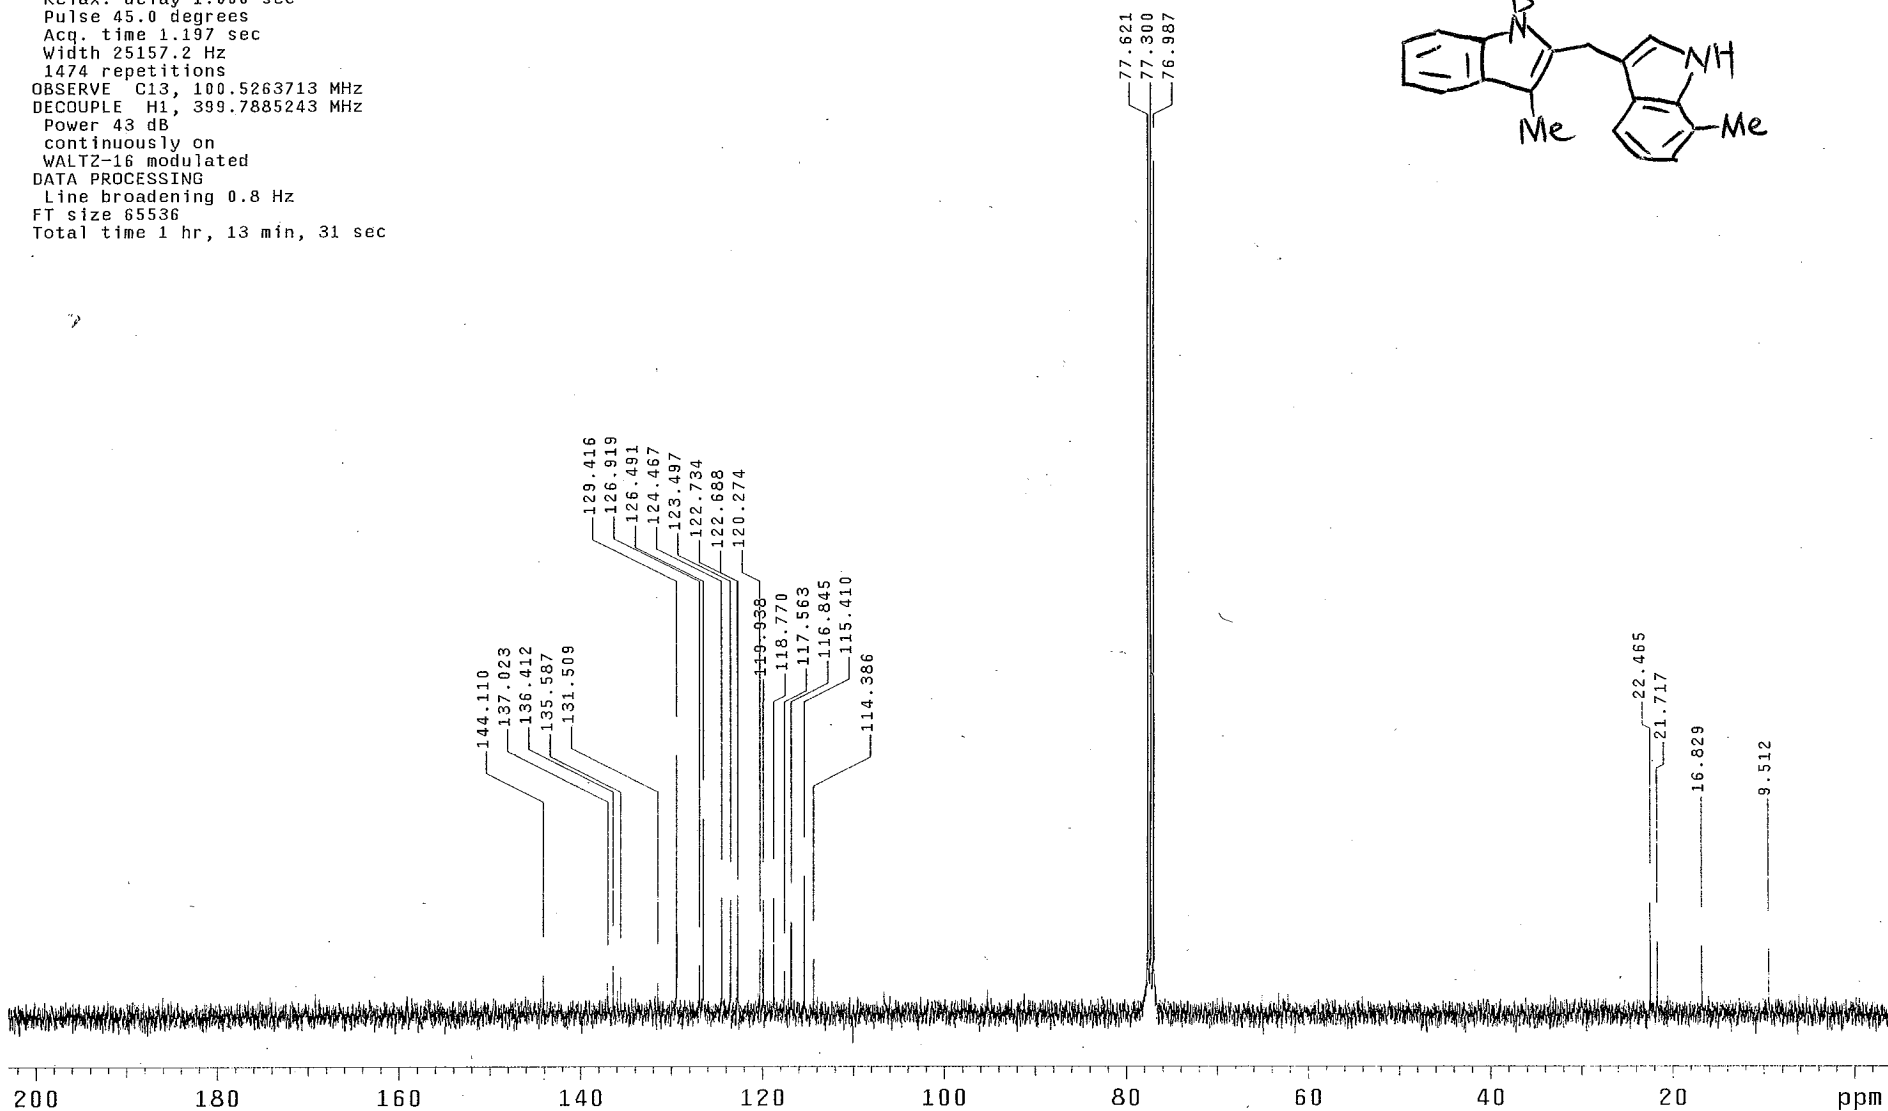



LiH-II-41p\_06Jun2014

Archive directory: /export/home/huili/vnmrsys/data  
Sample directory: LiH-II-41p\_06Jun2014  
File: PROTON

Pulse Sequence: s2pul

Solvent: CDCl3  
Temp. 25.0 C / 298.1 K  
INOVA-400 "ui400"

Relax. delay 1.000 sec  
Pulse 45.0 degrees  
Acq. time 3.754 sec  
Width 6387.7 Hz  
32 repetitions  
OBSERVE H1, 399.7865296 MHz  
DATA PROCESSING  
FT size 65536  
Total time 2 min, 51 sec

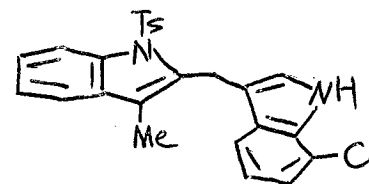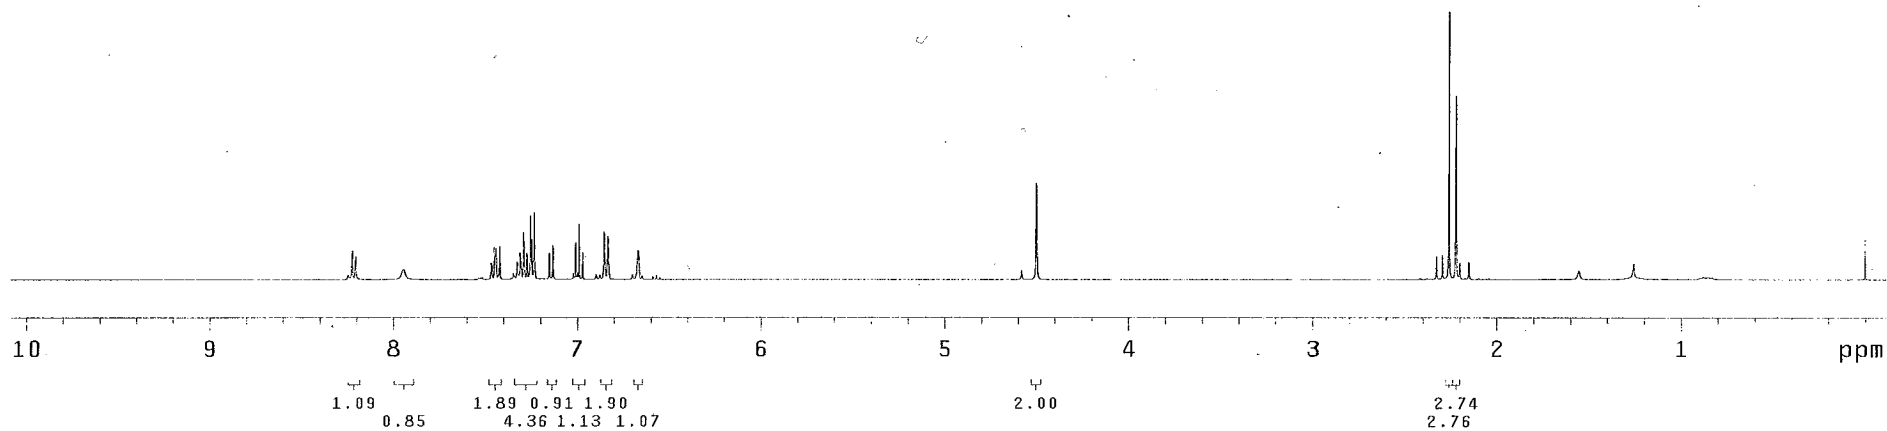

LiH-II-41p\_06Jun2014-14:30:54

Archive directory: /export/home/huili/vnmrsys/data  
Sample directory: LiH-II-41p\_06Jun2014-14:30:54

Pulse Sequence: s2pul

Solvent: CDCl3  
Temp. 25.0 C / 298.1 K  
File: CARBON  
INOVA-500 "nmr03"

Relax. delay 1.000 sec  
Pulse 45.0 degrees  
Acq. time 1.197 sec  
Width 25157.2 Hz  
341 repetitions  
OBSERVE C13, 100.5263736 MHz  
DECOUPLE H1, 399.7885243 MHz  
Power 43 dB  
continuously on  
WALTZ-16 modulated  
DATA PROCESSING  
Line broadening 0.8 Hz  
FT size 65536  
Total time 18 min, 49 sec

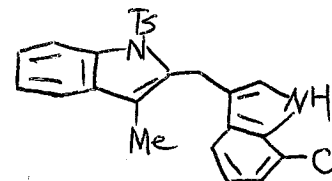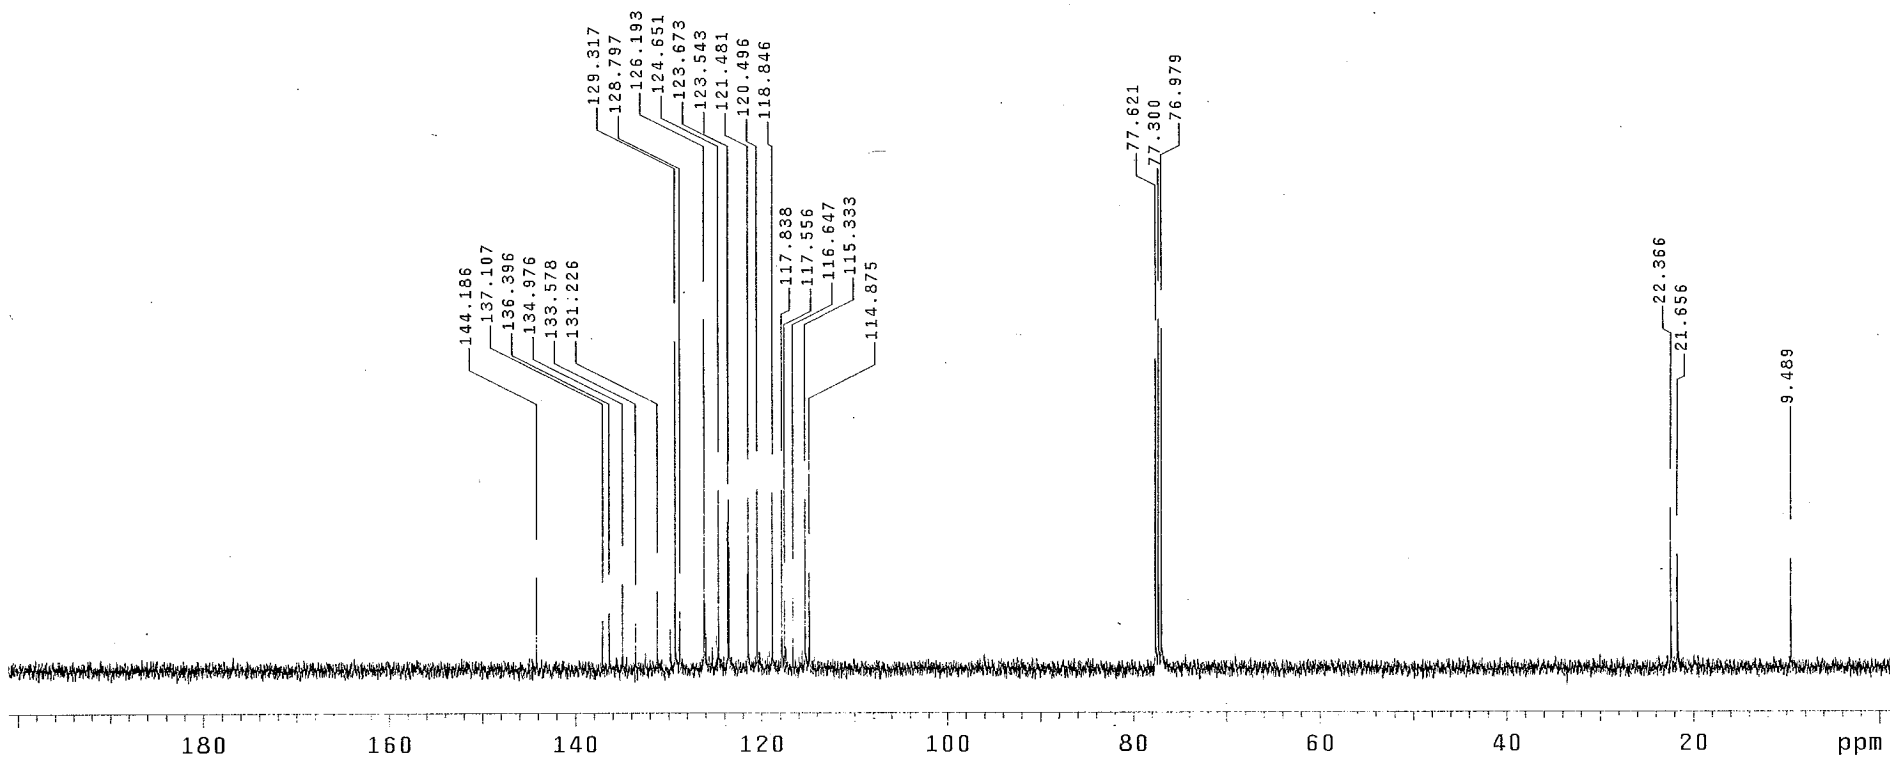

LiH-II-25\_15May2014

Archive directory: /export/home/huili/vnmrsys/data  
Sample directory: LiH-II-25\_15May2014

Pulse Sequence: s2pul

Solvent: CDCl<sub>3</sub>  
Temp. 25.0 C / 298.1 K  
File: PROTON  
INOVA-500 "nmr03"

Relax. delay 1.000 sec  
Pulse 45.0 degrees  
Acq. time 3.754 sec  
Width 6387.7 Hz  
8 repetitions  
OBSERVE H1, 399.786555 MHz  
DATA PROCESSING  
FT size 65536  
Total time 0 min, 57 sec

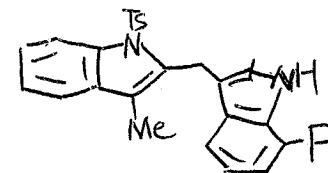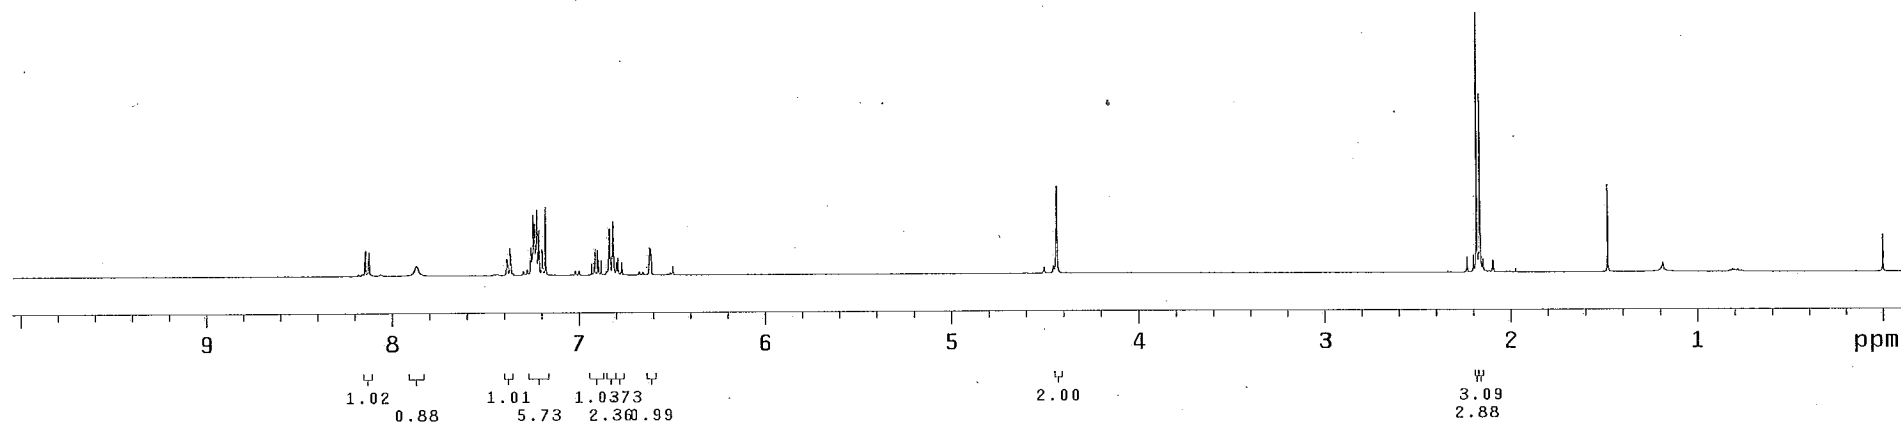

LiH-II-25\_15May2014-12:38:26

Archive directory: /export/home/huili/vnmrsys/data  
Sample directory: LiH-II-25\_15May2014-12:38:26

Pulse Sequence: s2pul

Solvent: CDC13  
Temp. 25.0 C / 298.1 K  
File: CARBON  
INNOVA-500 "nmr03"

Relax. delay 1.000 sec  
Pulse 45.0 degrees  
Acq. time 1.197 sec  
Width 25157.2 Hz  
512 repetitions  
OBSERVE C13, 100.5263721 MHz  
DECOUPLE H1, 399.7885243 MHz  
Power 43 dB  
continuously on  
WALTZ-16 modulated  
DATA PROCESSING  
Line broadening 0.8 Hz  
FT size 65536  
Total time 18 min, 49 sec

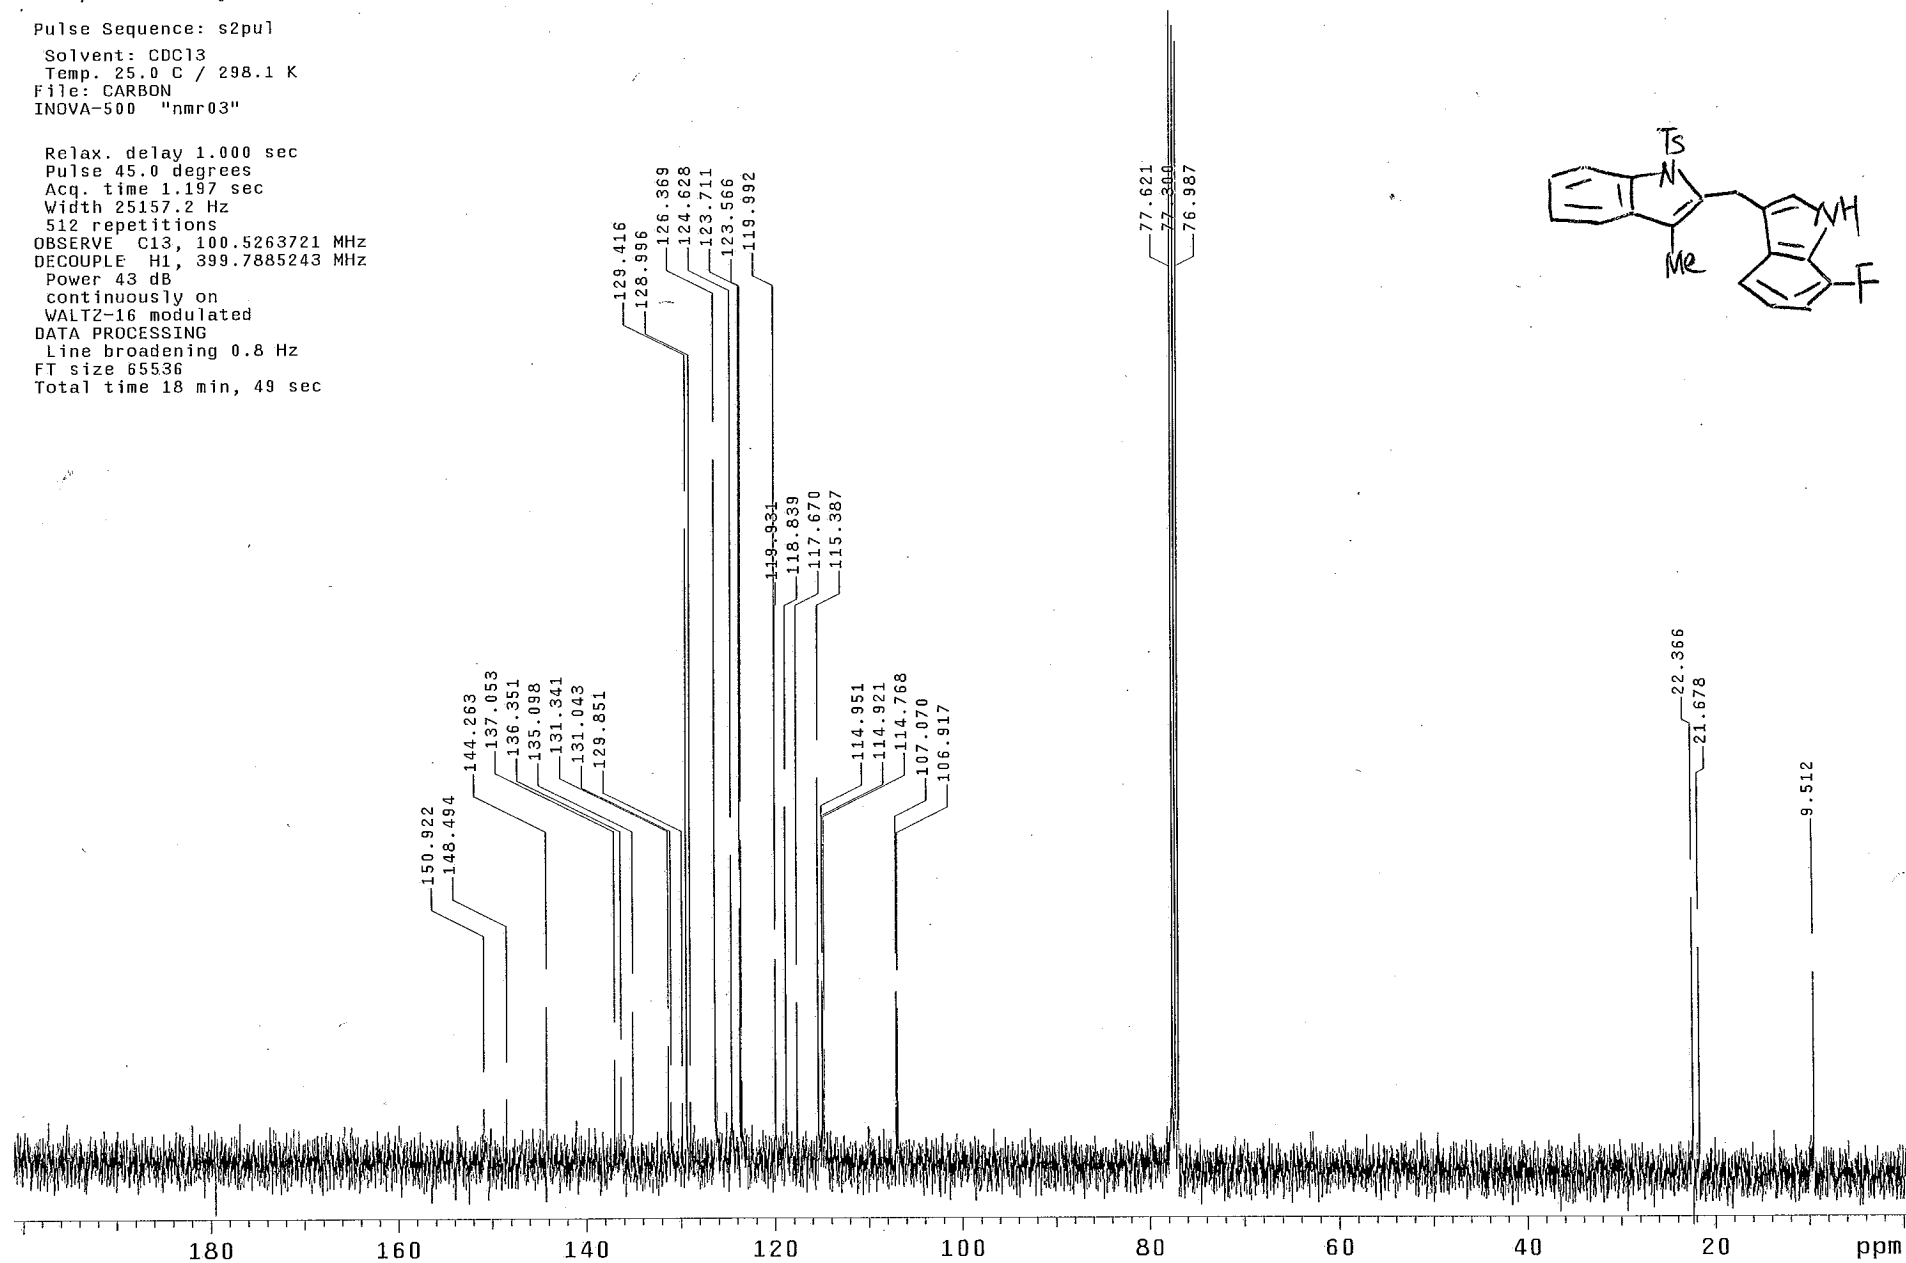

LiH-II-44\_20Jun2014

Archive directory: /export/home/huili/vnmrsys/data  
Sample directory: LiH-II-44\_20Jun2014  
File: PROTON

Pulse Sequence: s2pul  
Solvent: CDCl3  
Temp. 25.0 C / 298.1 K  
INOVA-400 "ui400"

Relax. delay 1.000 sec  
Pulse 45.0 degrees  
Acq. time 3.754 sec  
Width 6387.7 Hz  
16 repetitions  
OBSERVE H1, 399.7865268 MHz  
DATA PROCESSING  
FT size 65536  
Total time 1 min, 35 sec

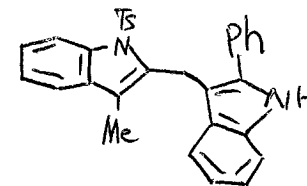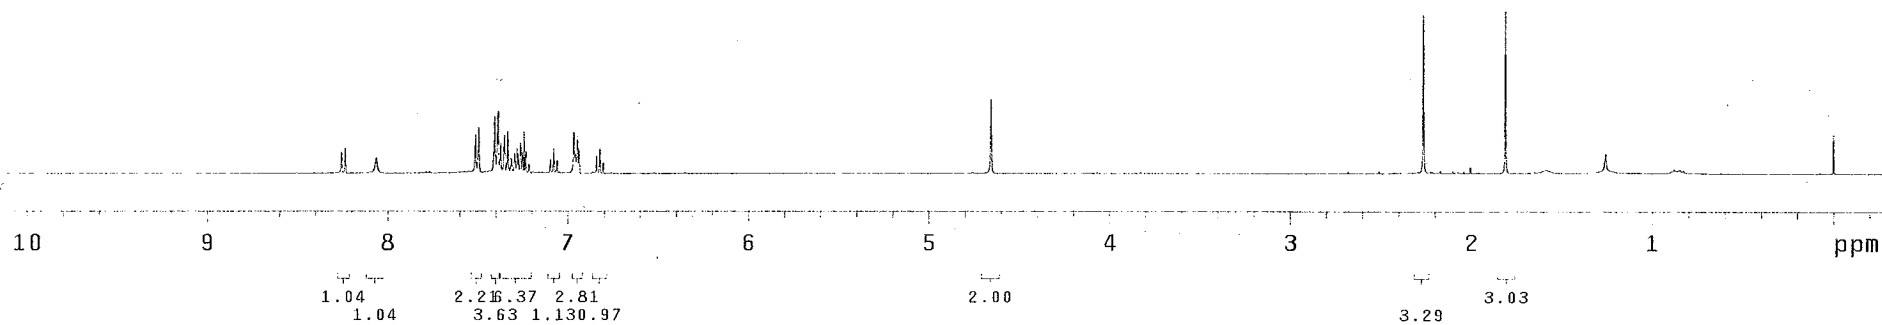

LiH-II-44\_20Jun2014-11:39:07

Archive directory: /export/home/huili/vnmrsys/data  
Sample directory: LiH-II-44\_20Jun2014-11:39:07  
File: CARBON

Pulse Sequence: s2pul

Solvent: CDCl3  
Temp. 25.0 C / 298.1 K  
INOVA-400 "ui400"

Relax. delay 1.000 sec  
Pulse 45.0 degrees  
Acq. time 1.197 sec  
Width 25157.2 Hz  
356 repetitions  
OBSERVE C13, 100.5263729 MHz  
DECOUPLE H1, 399.7885243 MHz  
Power 43 dB  
continuously on  
WALTZ-16 modulated  
DATA PROCESSING  
Line broadening 0.8 Hz  
FT size 65536  
Total time 36 min, 45 sec

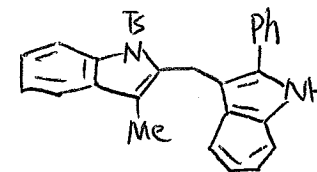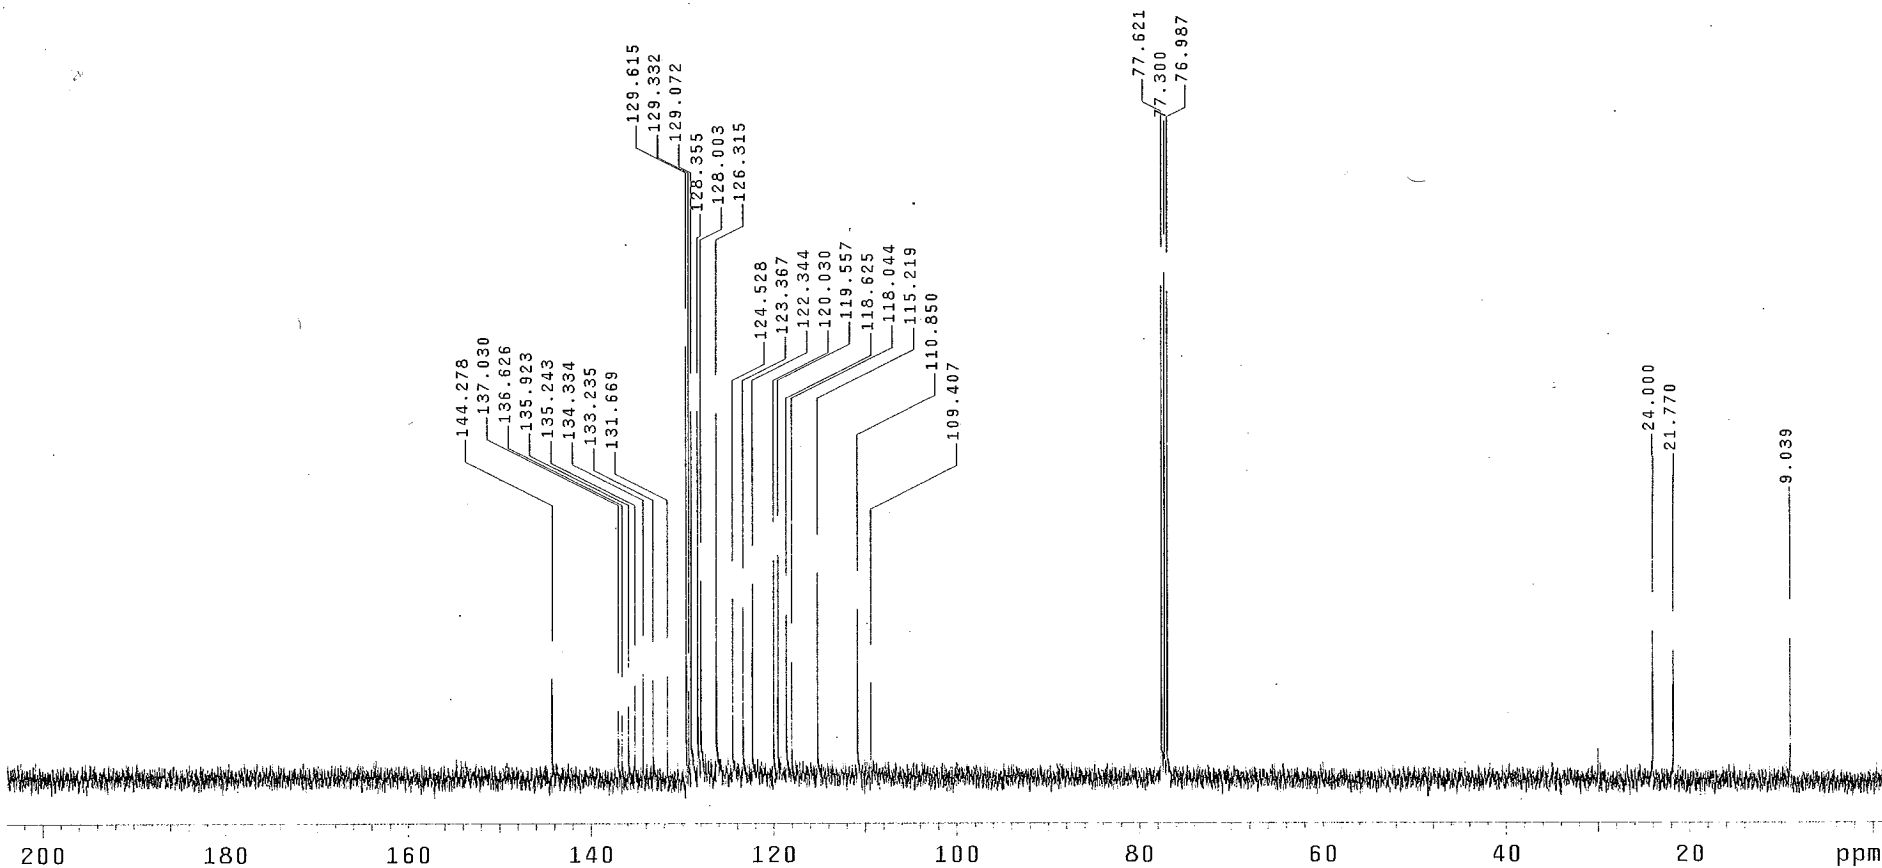

LiH-II-48\_20Jun2014

Archive directory: /export/home/huili/vnmrsys/data  
Sample directory: LiH-II-48\_20Jun2014

Pulse Sequence: s2pul

Solvent: CDCl3  
Temp. 25.0 C / 298.1 K  
File: PROTON  
INOVA-500 "nmr03"

Relax. delay 1.000 sec  
Pulse 45.0 degrees  
Acq. time 3.754 sec  
Width 6387.7 Hz  
16 repetitions  
OBSERVE H1, 399.7865214 MHz  
DATA PROCESSING  
FT size 65536  
Total time 1 min, 35 sec

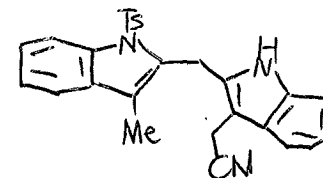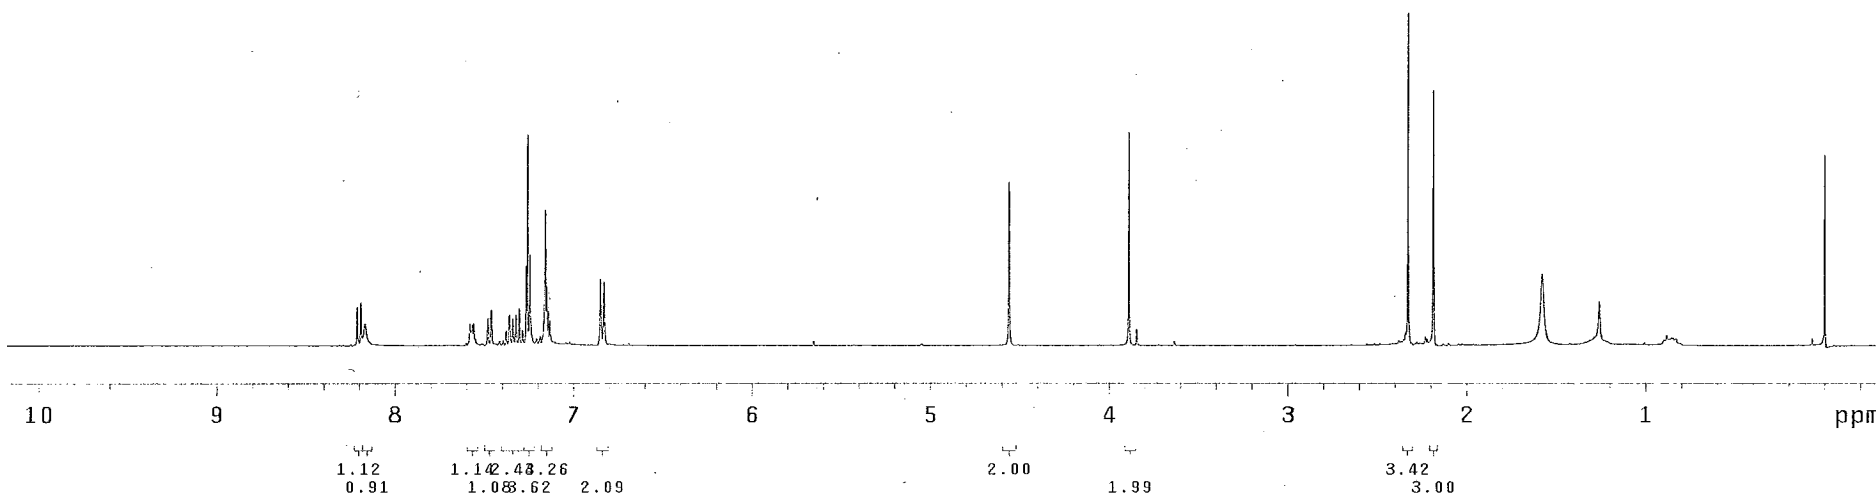

LiH-II-48\_20Jun2014-13:56:16

Archive directory: /export/home/huili/vnmrsys/data  
Sample directory: LiH-II-48\_20Jun2014-13:56:16  
File: CARBON

Pulse Sequence: s2pul

Solvent: CDCl3  
Temp. 25.0 C / 298.1 K  
INOVA-400 "ui400"

Relax. delay 1.000 sec  
Pulse 45.0 degrees  
Acq. time 1.197 sec  
Width 25157.2 Hz  
1566 repetitions  
OBSERVE C13, 100.5263705 MHz  
DECOUPLE H1, 399.7885243 MHz  
Power 43 dB  
continuously on  
WALTZ-16 modulated  
DATA PROCESSING  
Line broadening 0.8 Hz  
FT size 65536  
Total time 1 hr, 13 min, 31 sec

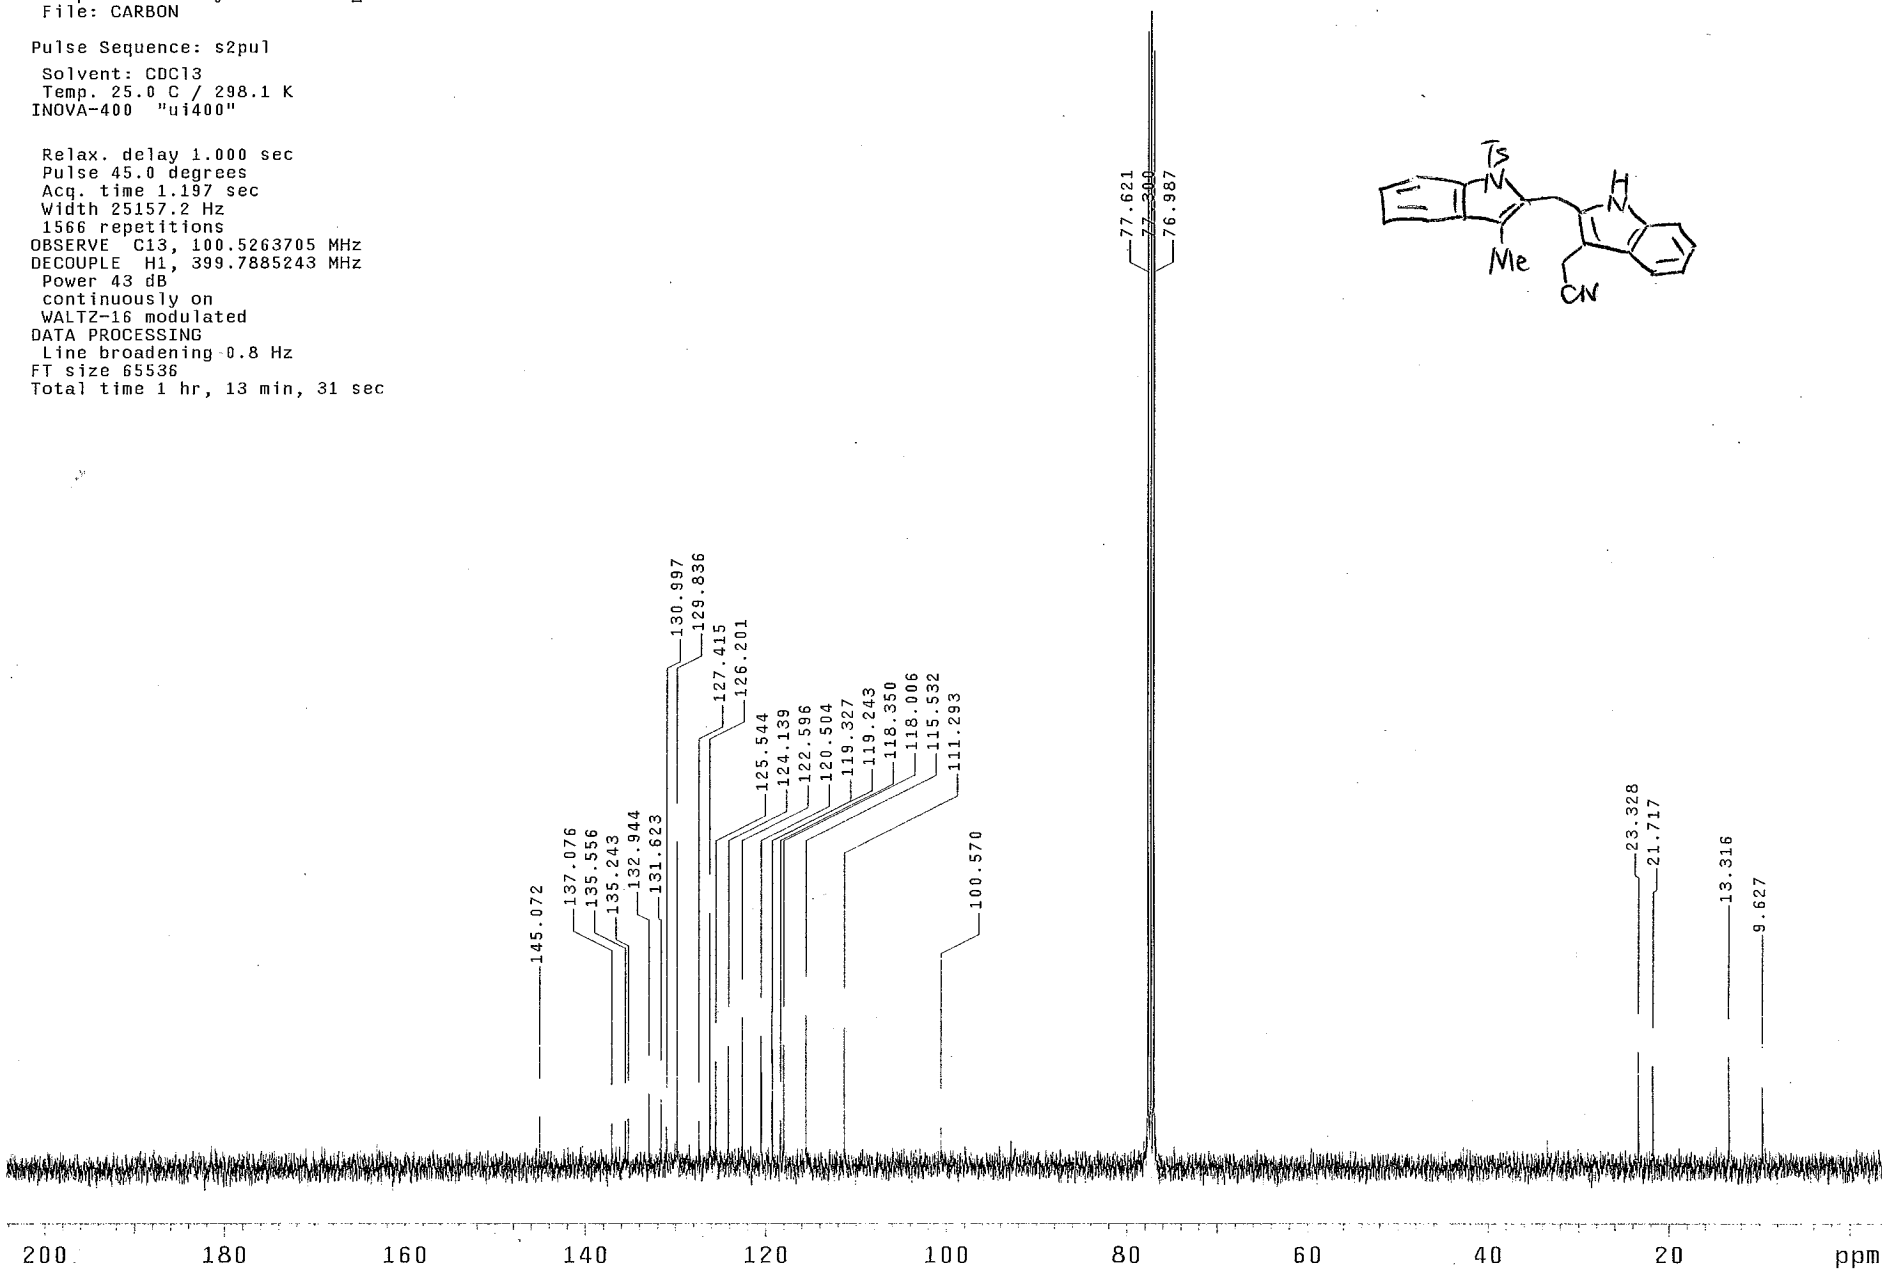



LiH-I-296-1\_07May2014

Archive directory: /export/home/huili/vnmrsys/data  
Sample directory: LiH-I-296-1\_07May2014

Pulse Sequence: s2pu1

Solvent: CDCl3  
Temp. 25.0 C / 298.1 K  
File: PROTON  
INOVA-500 "nmr03"

Relax. delay 1.000 sec  
Pulse 45.0 degrees  
Acq. time 3.754 sec  
Width 6387.7 Hz  
8 repetitions  
OBSERVE H1, 399.7865300 MHz  
DATA PROCESSING  
FT size 65536  
Total time 0 min, 57 sec

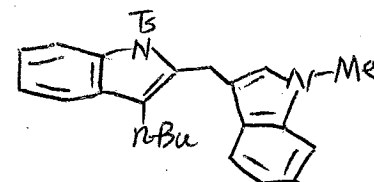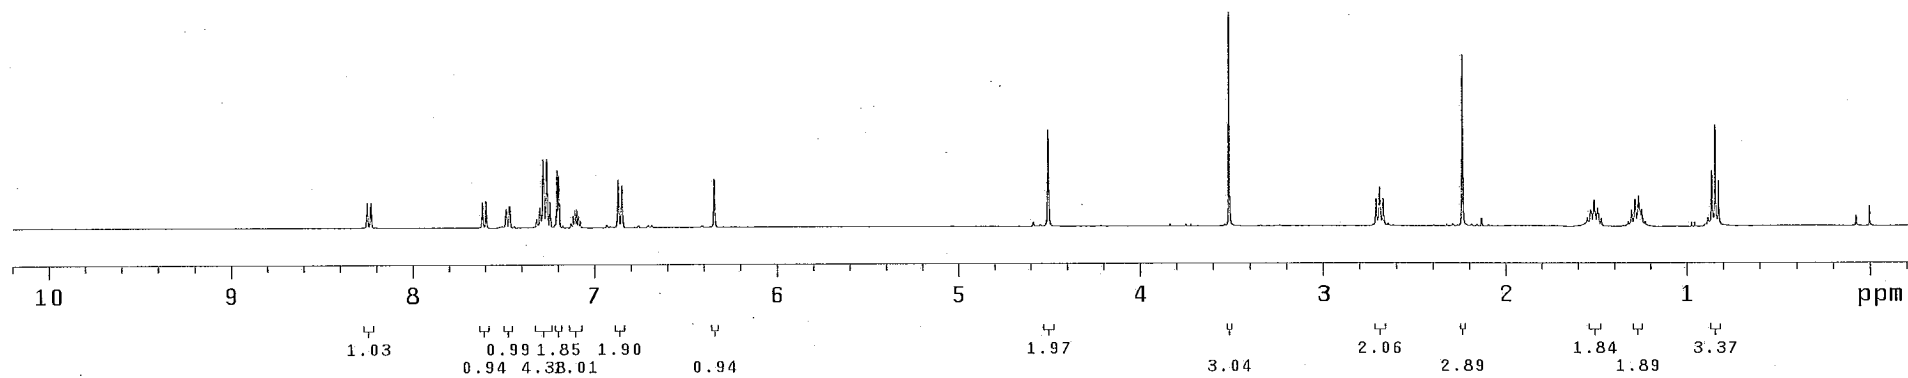

LiH-I-296-1\_07May2014-16:14:37

Archive directory: /export/home/huili/vnmrsys/data  
Sample directory: LiH-I-296-1\_07May2014-16:14:37

Pulse Sequence: s2pul

Solvent: CDCl<sub>3</sub>  
Temp. 25.0 C / 298.1 K  
File: CARBON  
INOVA-500 "nmr03"

Relax. delay 1.000 sec  
Pulse 45.0 degrees  
Acq. time 1.197 sec  
Width 25157.2 Hz  
256 repetitions  
OBSERVE C13, 100.5263736 MHz  
DECOUPLE H1, 399.7885243 MHz  
Power 43 dB  
continuously on  
WALTZ-16 modulated  
DATA PROCESSING  
Line broadening 0.8 Hz  
FT size 65536  
Total time 9 min, 24 sec

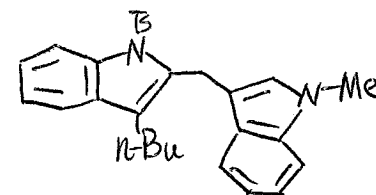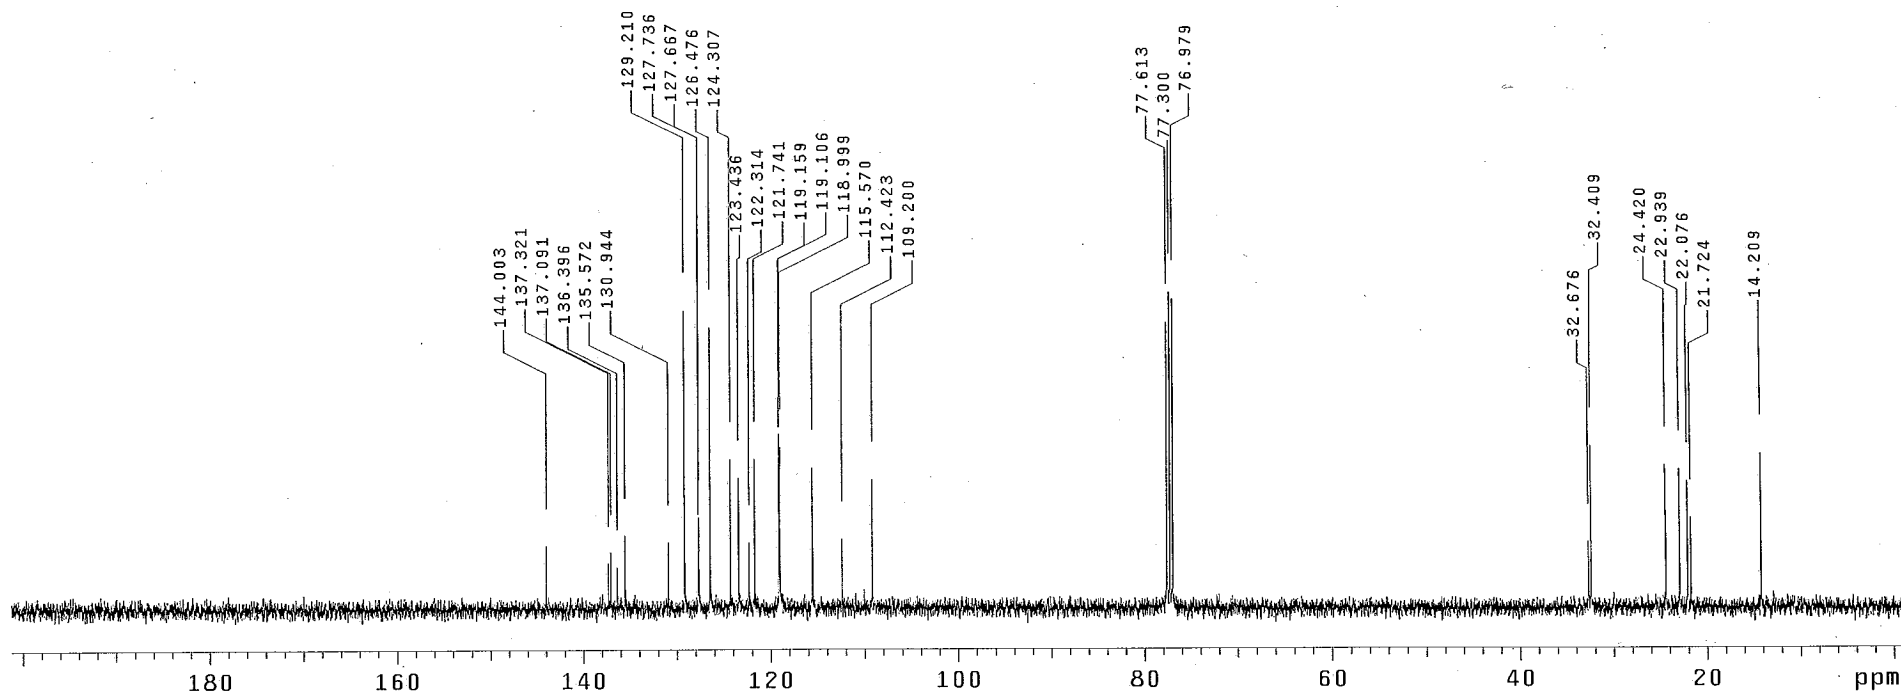

LiH-I-297\_08May2014

Archive directory: /export/home/huili/vnmrsys/data  
Sample directory: LiH-I-297\_08May2014

Pulse Sequence: s2pul

Solvent: CDCl3  
Temp. 25.0 C / 298.1 K  
File: PROTON  
INOVA-500 "nmr03"

Relax. delay 1.000 sec  
Pulse 45.0 degrees  
Acq. time 3.754 sec  
Width 6387.7 Hz  
8 repetitions  
OBSERVE H1, 399.7865274 MHz  
DATA PROCESSING  
FT size 65536  
Total time 0 min, 57 sec

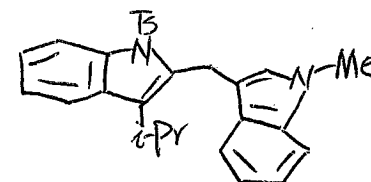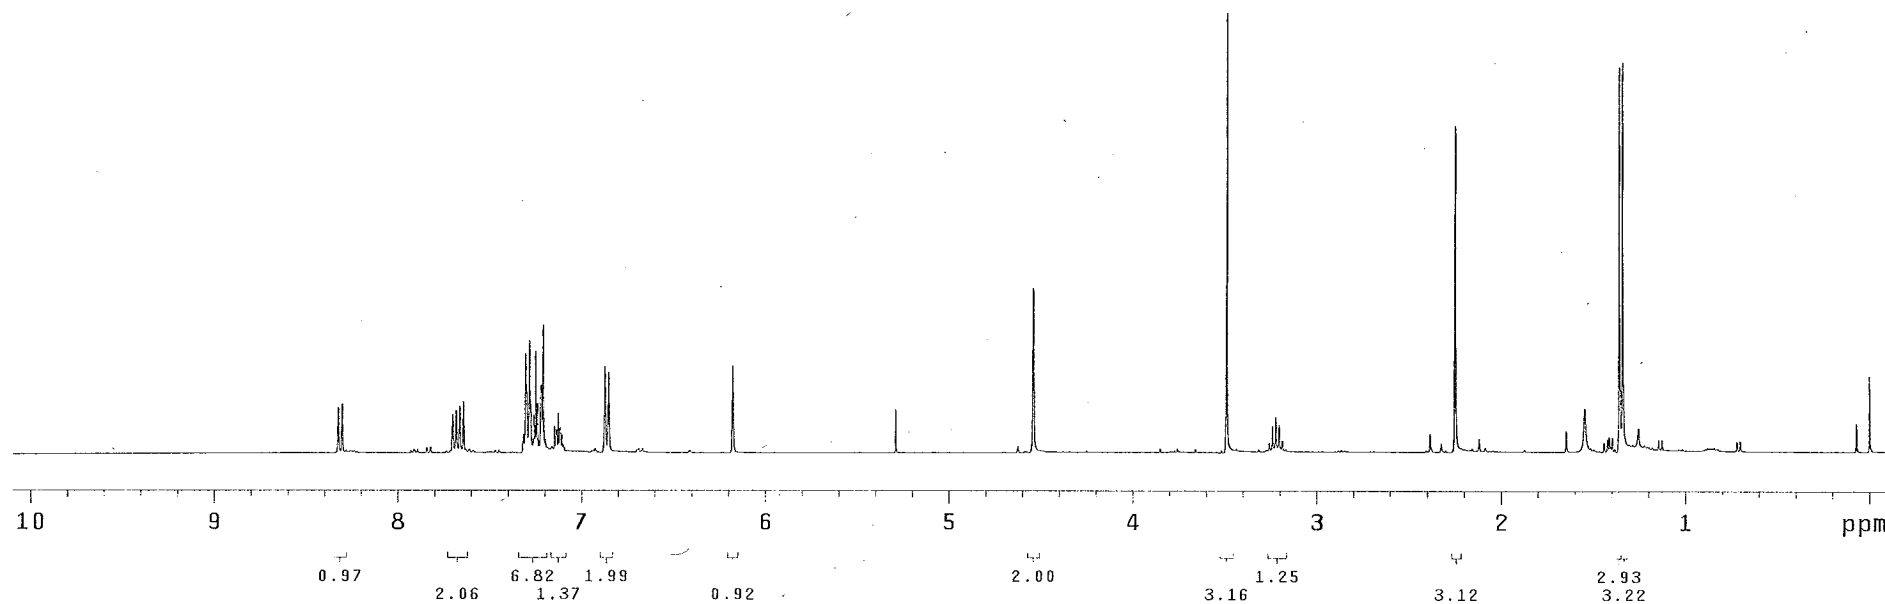

LiH-I-297\_07May2014-17:30:06

Archive directory: /export/home/huili/vnmrsys/data  
Sample directory: LiH-I-297\_07May2014-17:30:06

Pulse Sequence: s2pul

Solvent: CDCl3  
Temp. 25.0 C / 298.1 K  
File: CARBON  
INOVA-500 "nmr03"

Relax. delay 1.000 sec  
Pulse 45.0 degrees  
Acq. time 1.197 sec  
Width 25157.2 Hz  
256 repetitions  
OBSERVE C13, 100.5263729 MHz  
DECOUPLE H1, 399.7885243 MHz  
Power 43 dB  
continuously on  
WALTZ-16 modulated  
DATA PROCESSING  
Line broadening 0.8 Hz  
FT size 65536  
Total time 9 min, 24 sec

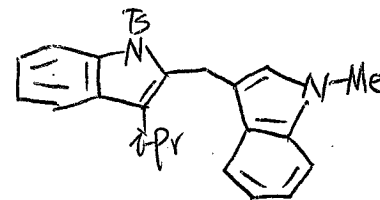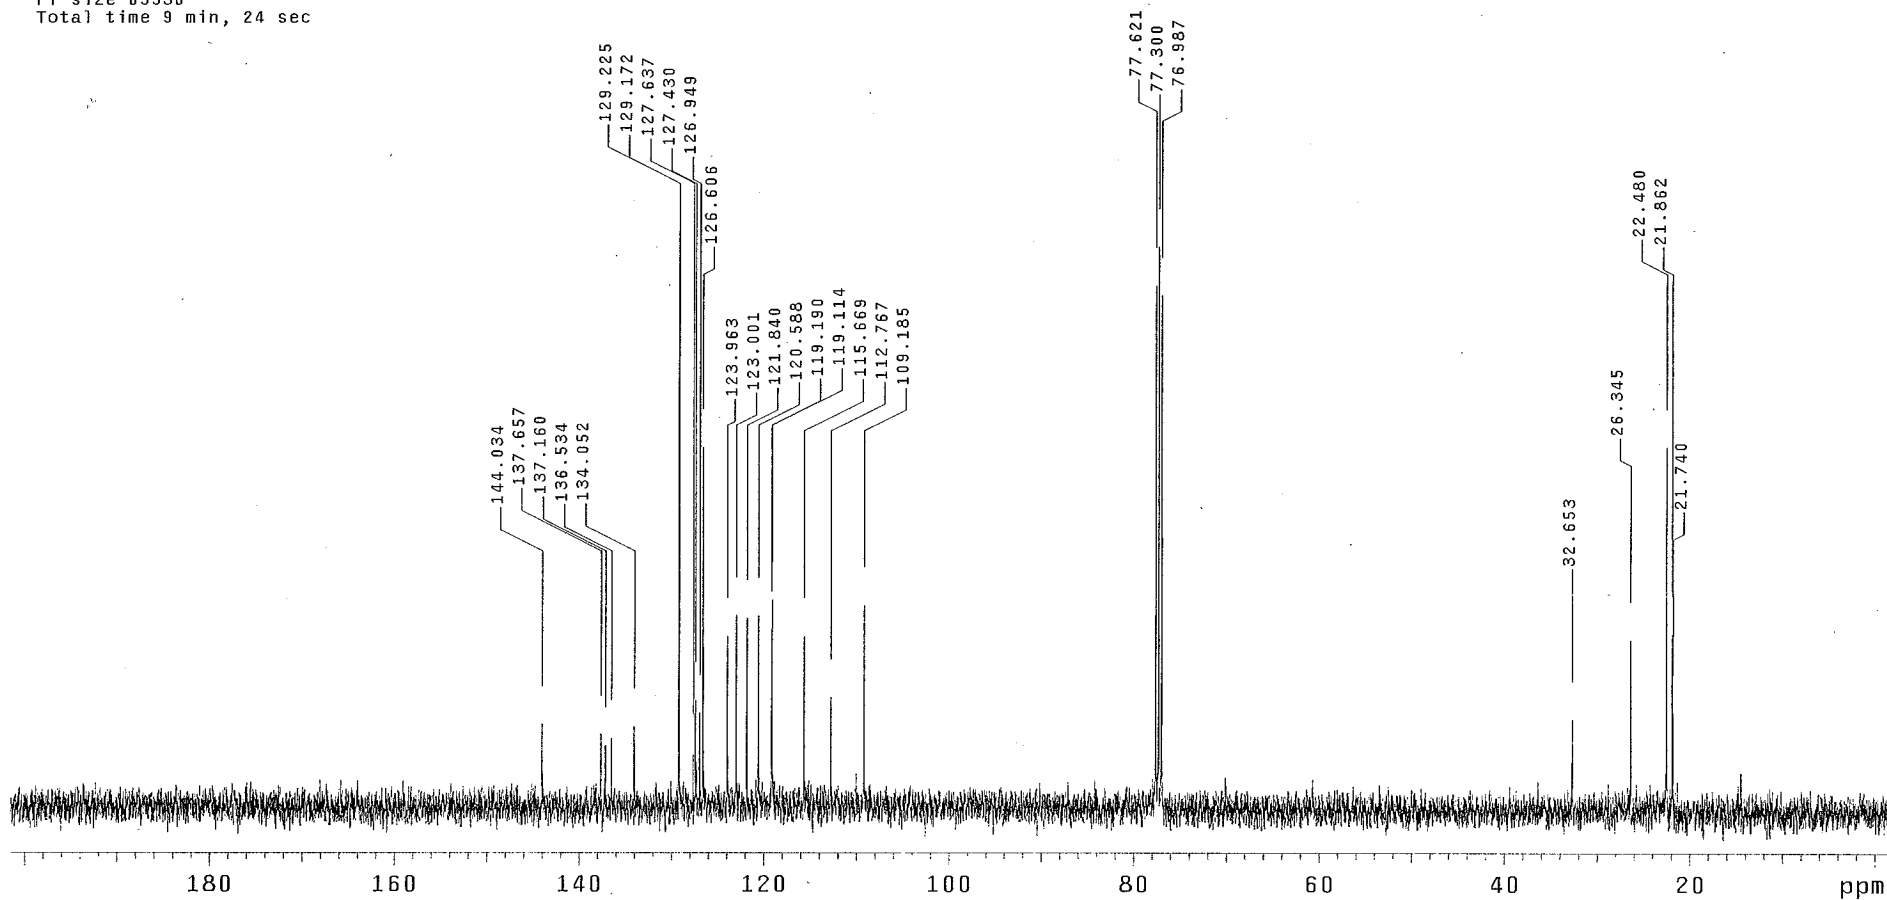

LiH-I-299-1\_07May2014

Archive directory: /export/home/huili/vnmrsys/data  
Sample directory: LiH-I-299-1\_07May2014

Pulse Sequence: s2pul

Solvent: CDCl3  
Temp. 25.0 C / 298.1 K  
File: PROTON  
INOVA-500 "nmr03"

Relax. delay 1.000 sec  
Pulse 45.0 degrees  
Acq. time 3.747 sec  
Width 8000.0 Hz  
8 repetitions  
OBSERVE H1, 499.7288222 MHz  
DATA PROCESSING  
Line broadening 0.5 Hz  
FT size 65536  
Total time 0 min, 38 sec

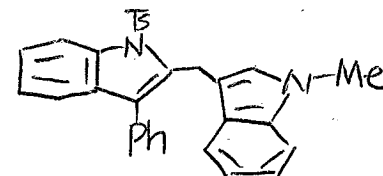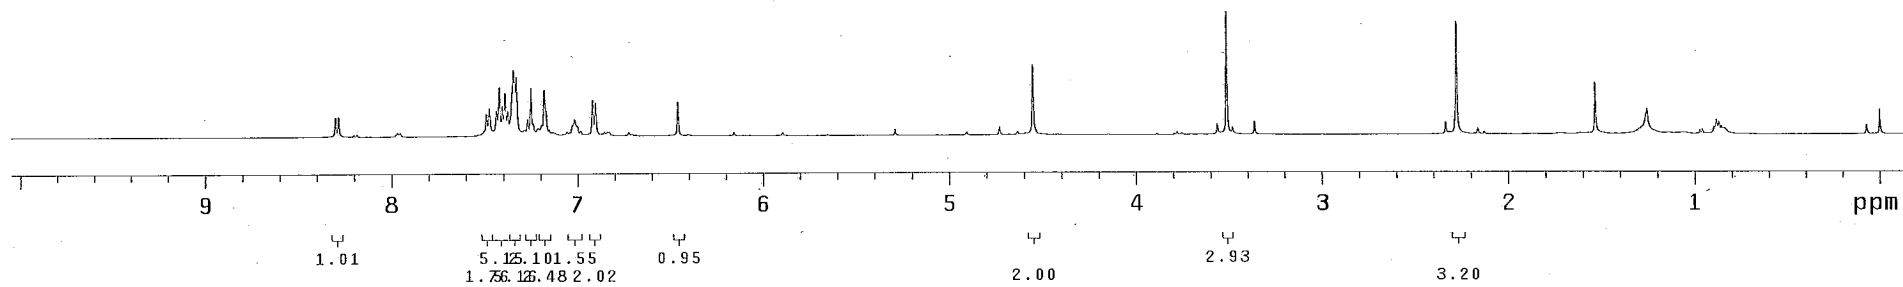

LiH-I-299-1\_07May2014

Archive directory: /export/home/huili/vnmrsys/data  
Sample directory: LiH-I-299-1\_07May2014

Pulse Sequence: s2pul

Solvent: CDCl<sub>3</sub>  
Temp. 25.0 C / 298.1 K  
File: CARBON  
INNOVA-500 "nmr03"

Relax. delay 1.000 sec  
Pulse 45.0 degrees  
Acq. time 1.197 sec  
Width 25157.2 Hz  
256 repetitions  
OBSERVE C13, 100.5263721 MHz  
DECOUPLE H1, 399.7885243 MHz  
Power: 43 dB  
continuously on  
WALTZ-16 modulated  
DATA PROCESSING  
Line broadening 0.8 Hz  
FT size 65536  
Total time 9 min, 24 sec

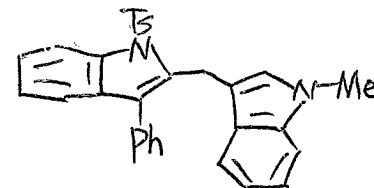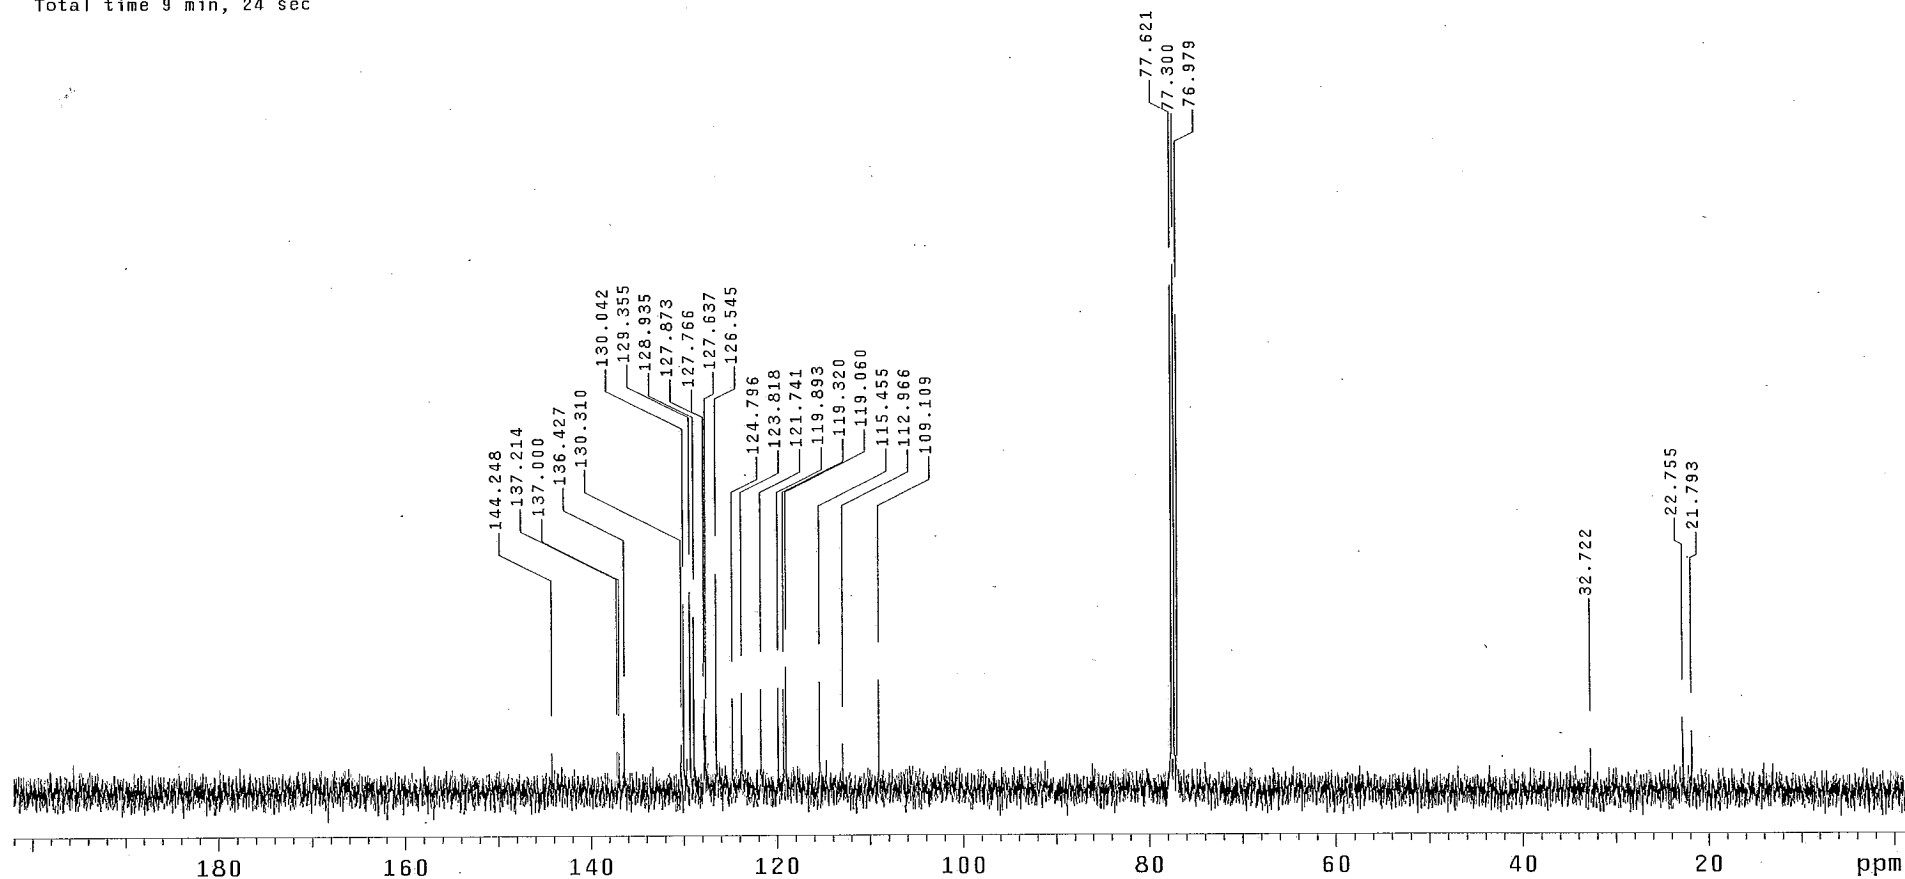

20140821.LiH-furanproduct

Archive directory: /export/home/huili/vnmrsys/data  
Sample directory: 20140821.LiH-furanproduct

Pulse Sequence: s2pu1

Solvent: CDCl3  
Temp. 25.0 C / 298.1 K  
File: PROTON  
INOVA-500 "nmr03"

Relax. delay 1.000 sec  
Pulse 45.0 degrees  
Acq. time 3.747 sec  
Width 8000.0 Hz  
18 repetitions  
OBSERVE H1, 499.7288244 MHz  
DATA PROCESSING  
Line broadening 0.5 Hz  
FT size 65536  
Total time 2 min, 32 sec

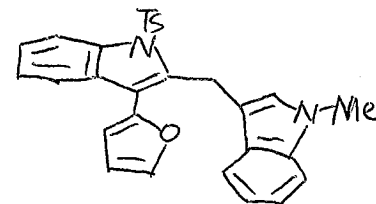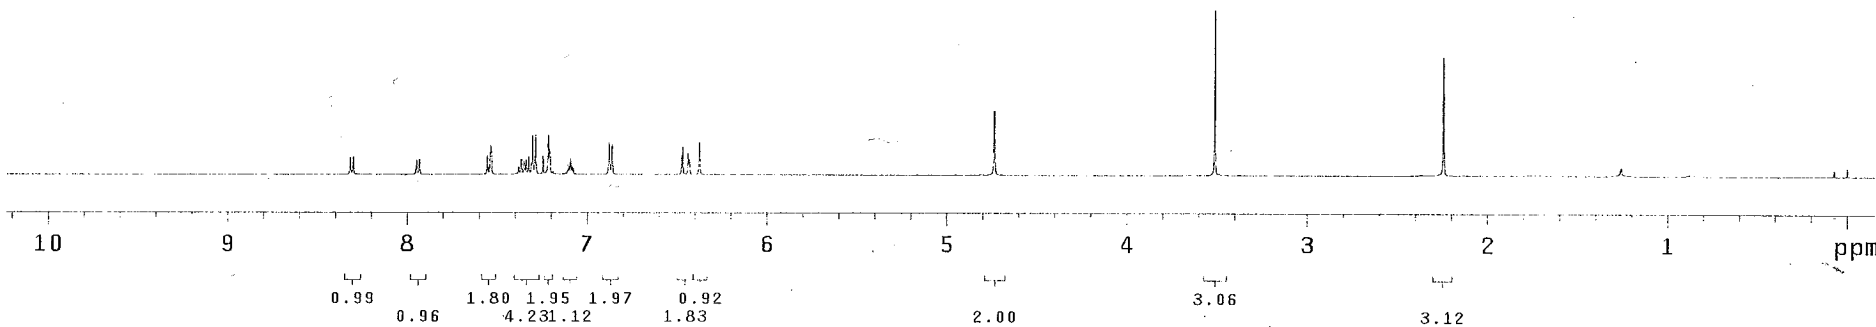

LiH-I-298\_07May2014-17:26:09

Archive directory: /export/home/huili/vnmrSYS/data  
Sample directory: LiH-I-298\_07May2014-17:26:09

Pulse Sequence: s2pul

Solvent: CDCl<sub>3</sub>  
Temp. 25.0 C / 298.1 K  
User: 1-14-87  
File: CARBON  
INNOVA-500 "nmr03"

Relax. delay 1.000 sec  
Pulse 45.0 degrees  
Acq. time 1.299 sec  
Width 31446.5 Hz  
244 repetitions  
OBSERVE C13, 125.6568789 MHz  
DECOUPLE H1, 499.7312897 MHz  
Power 39 dB  
continuously on  
WALTZ-16 modulated  
DATA PROCESSING  
Line broadening 0.5 Hz  
FT size 131072  
Total time 9 min, 55 sec

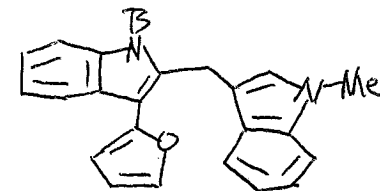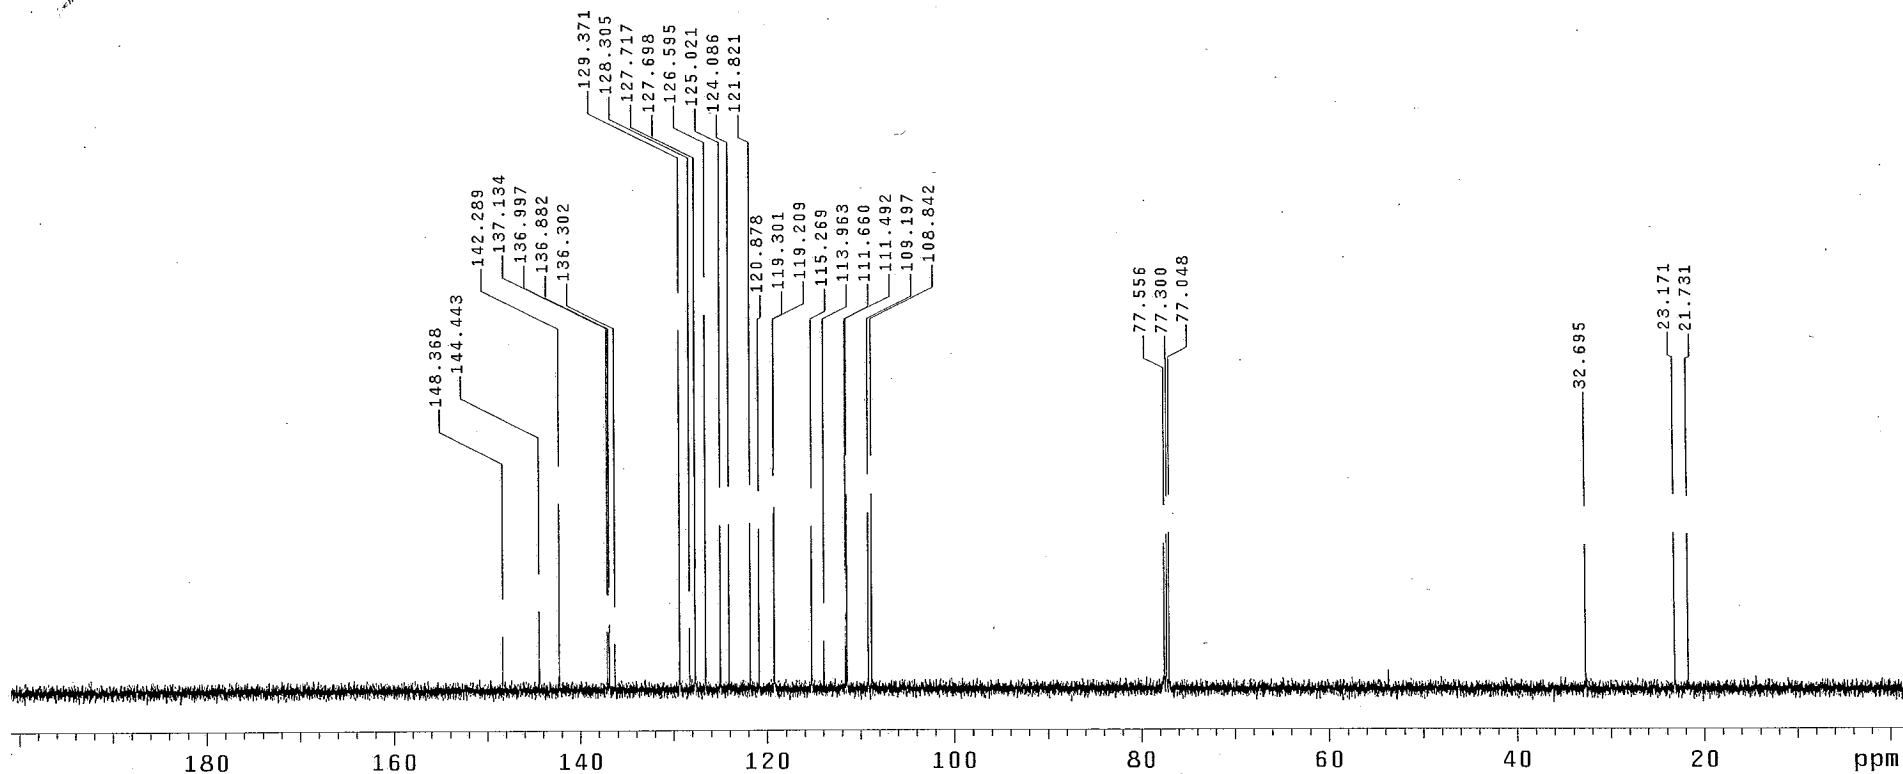



LiH-II-32-2\_22May2014

Archive directory: /export/home/huili/vnmrsys/data  
Sample directory: LiH-II-32-2\_22May2014

Pulse Sequence: s2pul

Solvent: CDCl3  
Temp. 25.0 C / 298.1 K  
File: PROTON  
INOVA-500 "nmr03"

Relax. delay 1.000 sec  
Pulse 45.0 degrees  
Acq. time 3.747 sec  
Width 8000.0 Hz  
16 repetitions  
OBSERVE H1, 499.7288234 MHz  
DATA PROCESSING  
Line broadening 0.5 Hz  
FT size 65536  
Total time 1 min, 16 sec

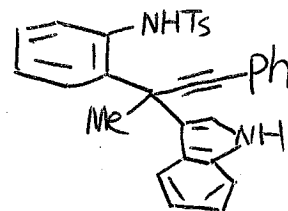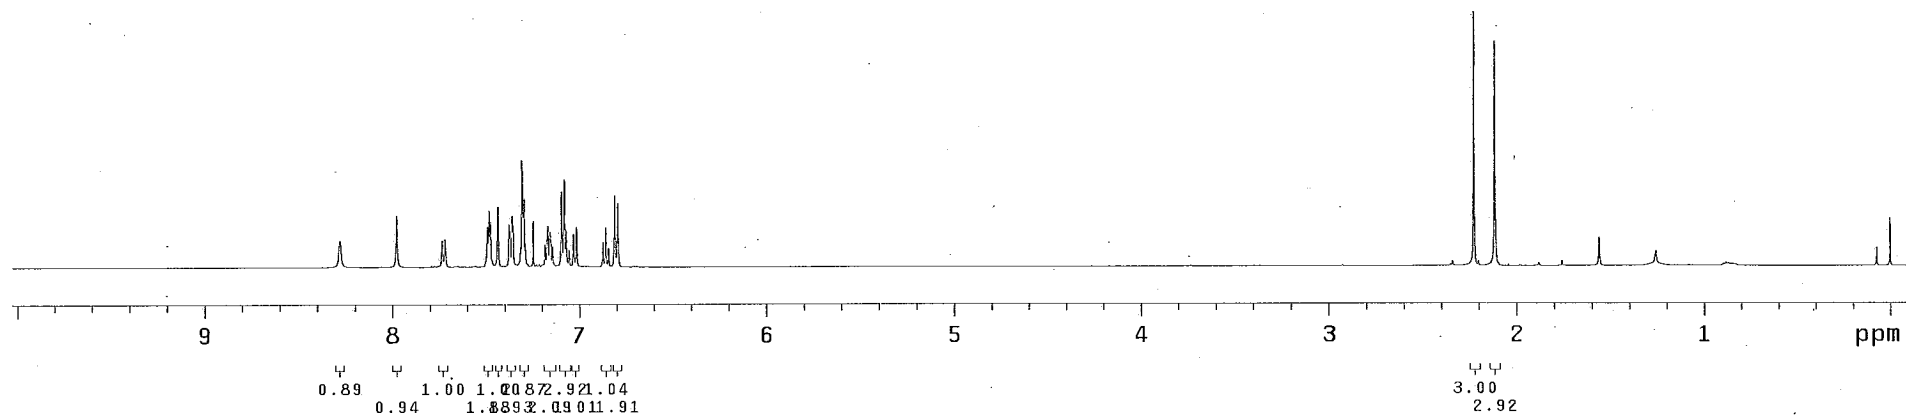

LiH-II-32-2\_22May2014-11:52:15

Archive directory: /export/home/huili/vnmrsys/data  
Sample directory: LiH-II-32-2\_22May2014-11:52:15

Pulse Sequence: s2pu1

Solvent: CDCl3  
Temp. 25.0 C / 298.1 K  
User: 1-14-87  
File: CARBON  
INOVA-500 "nmr03"

Relax. delay 1.000 sec  
Pulse 45.0 degrees  
Acq. time 1.299 sec  
Width 31446.5 Hz  
256 repetitions  
OBSERVE C13, 125.6568760 MHz  
DECOUPLE H1, 499.7312897 MHz  
Power 39 dB  
continuously on  
WALTZ-16 modulated  
DATA PROCESSING  
Line broadening 0.5 Hz  
FT size 131072  
Total time 9 min, 55 sec

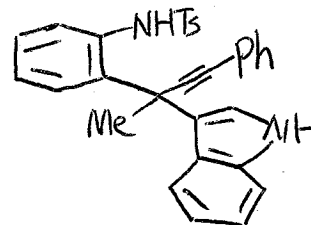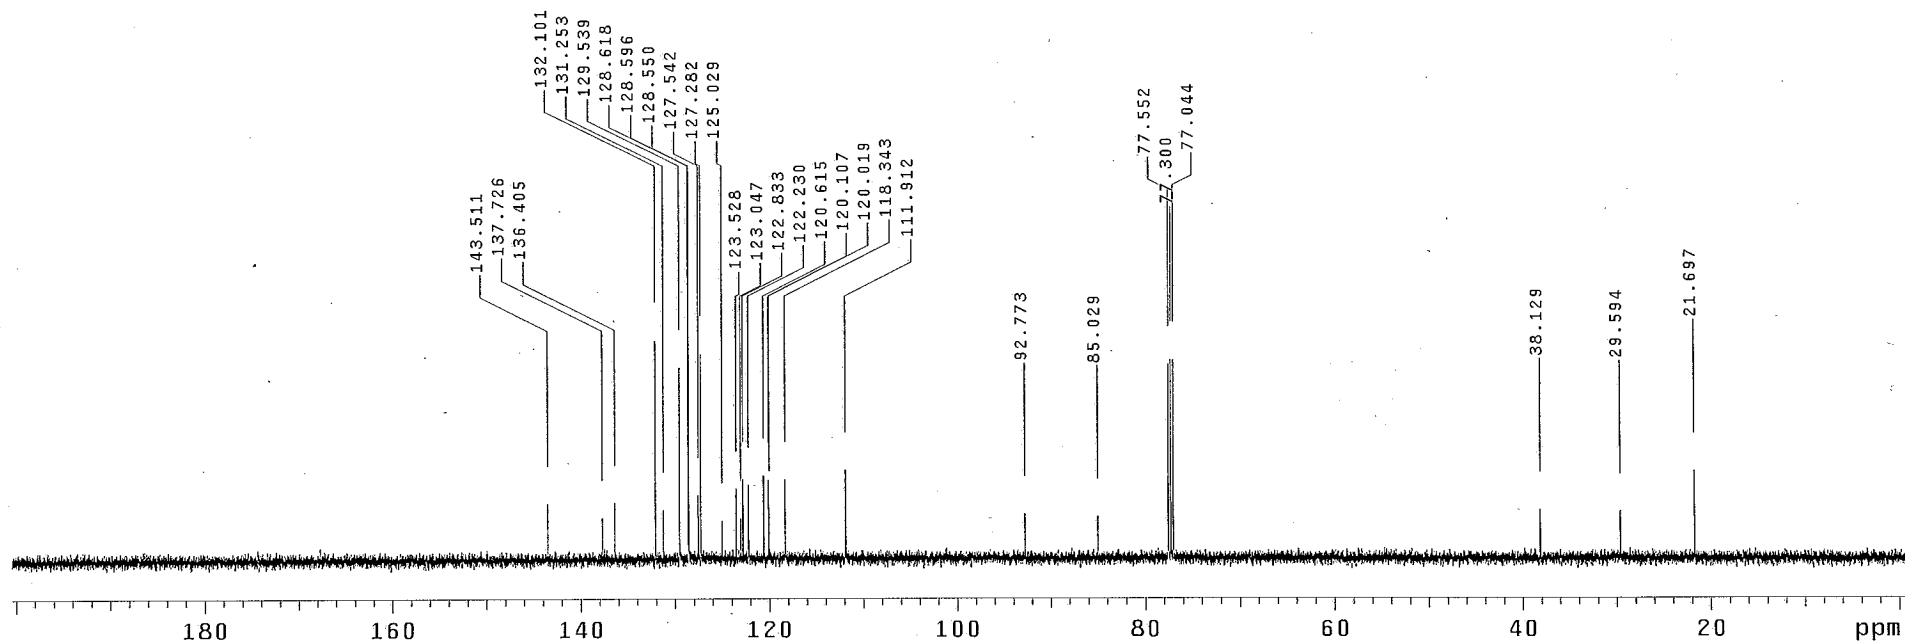

LiH-I-289\_05May2014

Archive directory: /export/home/huilli/vnmrsys/data  
Sample directory: LiH-I-289\_05May2014

Pulse Sequence: s2pu1

Solvent: CDCl3  
Temp. 25.0 C / 298.1 K  
File: PROTON  
INNOVA-500 "nmr03"

Relax. delay 1.000 sec  
Pulse 45.0 degrees  
Acq. time 3.754 sec  
Width 6387.7 Hz  
8 repetitions  
OBSERVE H1, 399.7865266 MHz  
DATA PROCESSING  
FT size 65536  
Total time 0 min, 57 sec

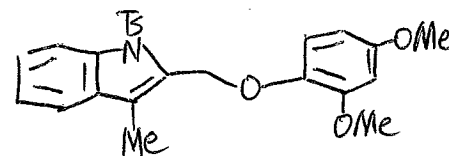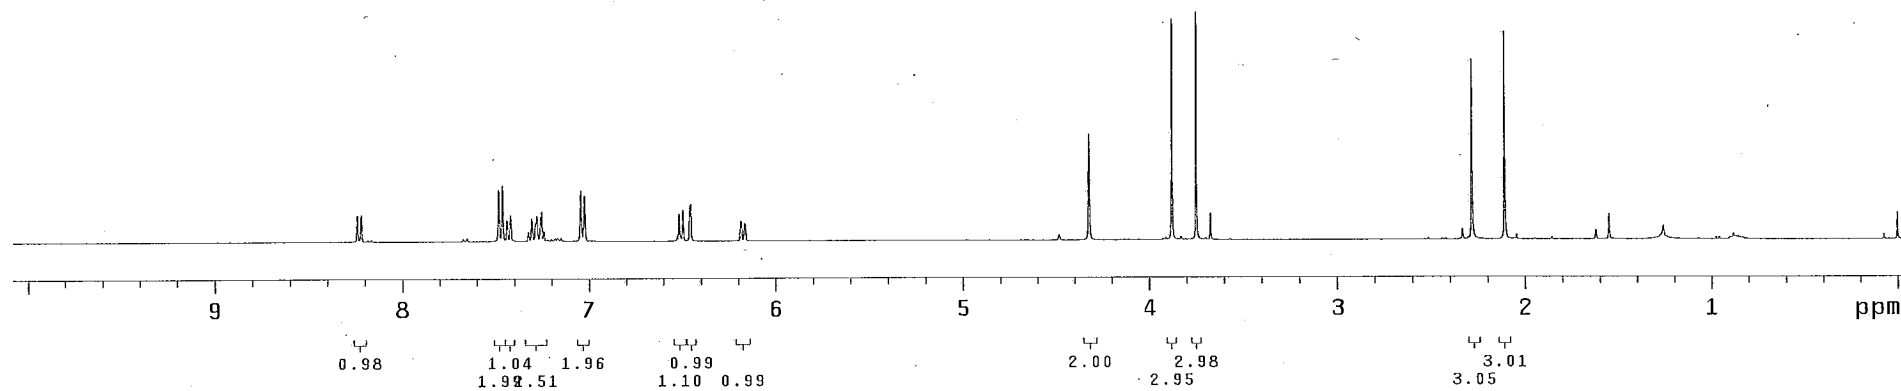

LiH-I-289\_05May2014

Archive directory: /export/home/huili/vnmrsys/data  
Sample directory: LiH-I-289\_05May2014

Pulse Sequence: s2pu1

Solvent: CDC13  
Temp. 25.0 C / 298.1 K  
User: 1-14-87  
File: CARBON  
INOVA-500 "ui500"

Relax. delay 1.000 sec  
Pulse 45.0 degrees  
Acq. time 1.299 sec  
Width 31446.5 Hz  
256 repetitions  
OBSERVE C13, 125.6568744 MHz  
DECOUPLE H1, 499.7312897 MHz  
Power 39 dB  
continuously on  
WALTZ-16 modulated  
DATA PROCESSING  
Line broadening 0.5 Hz  
FT size 131072  
Total time 9 min, 55 sec

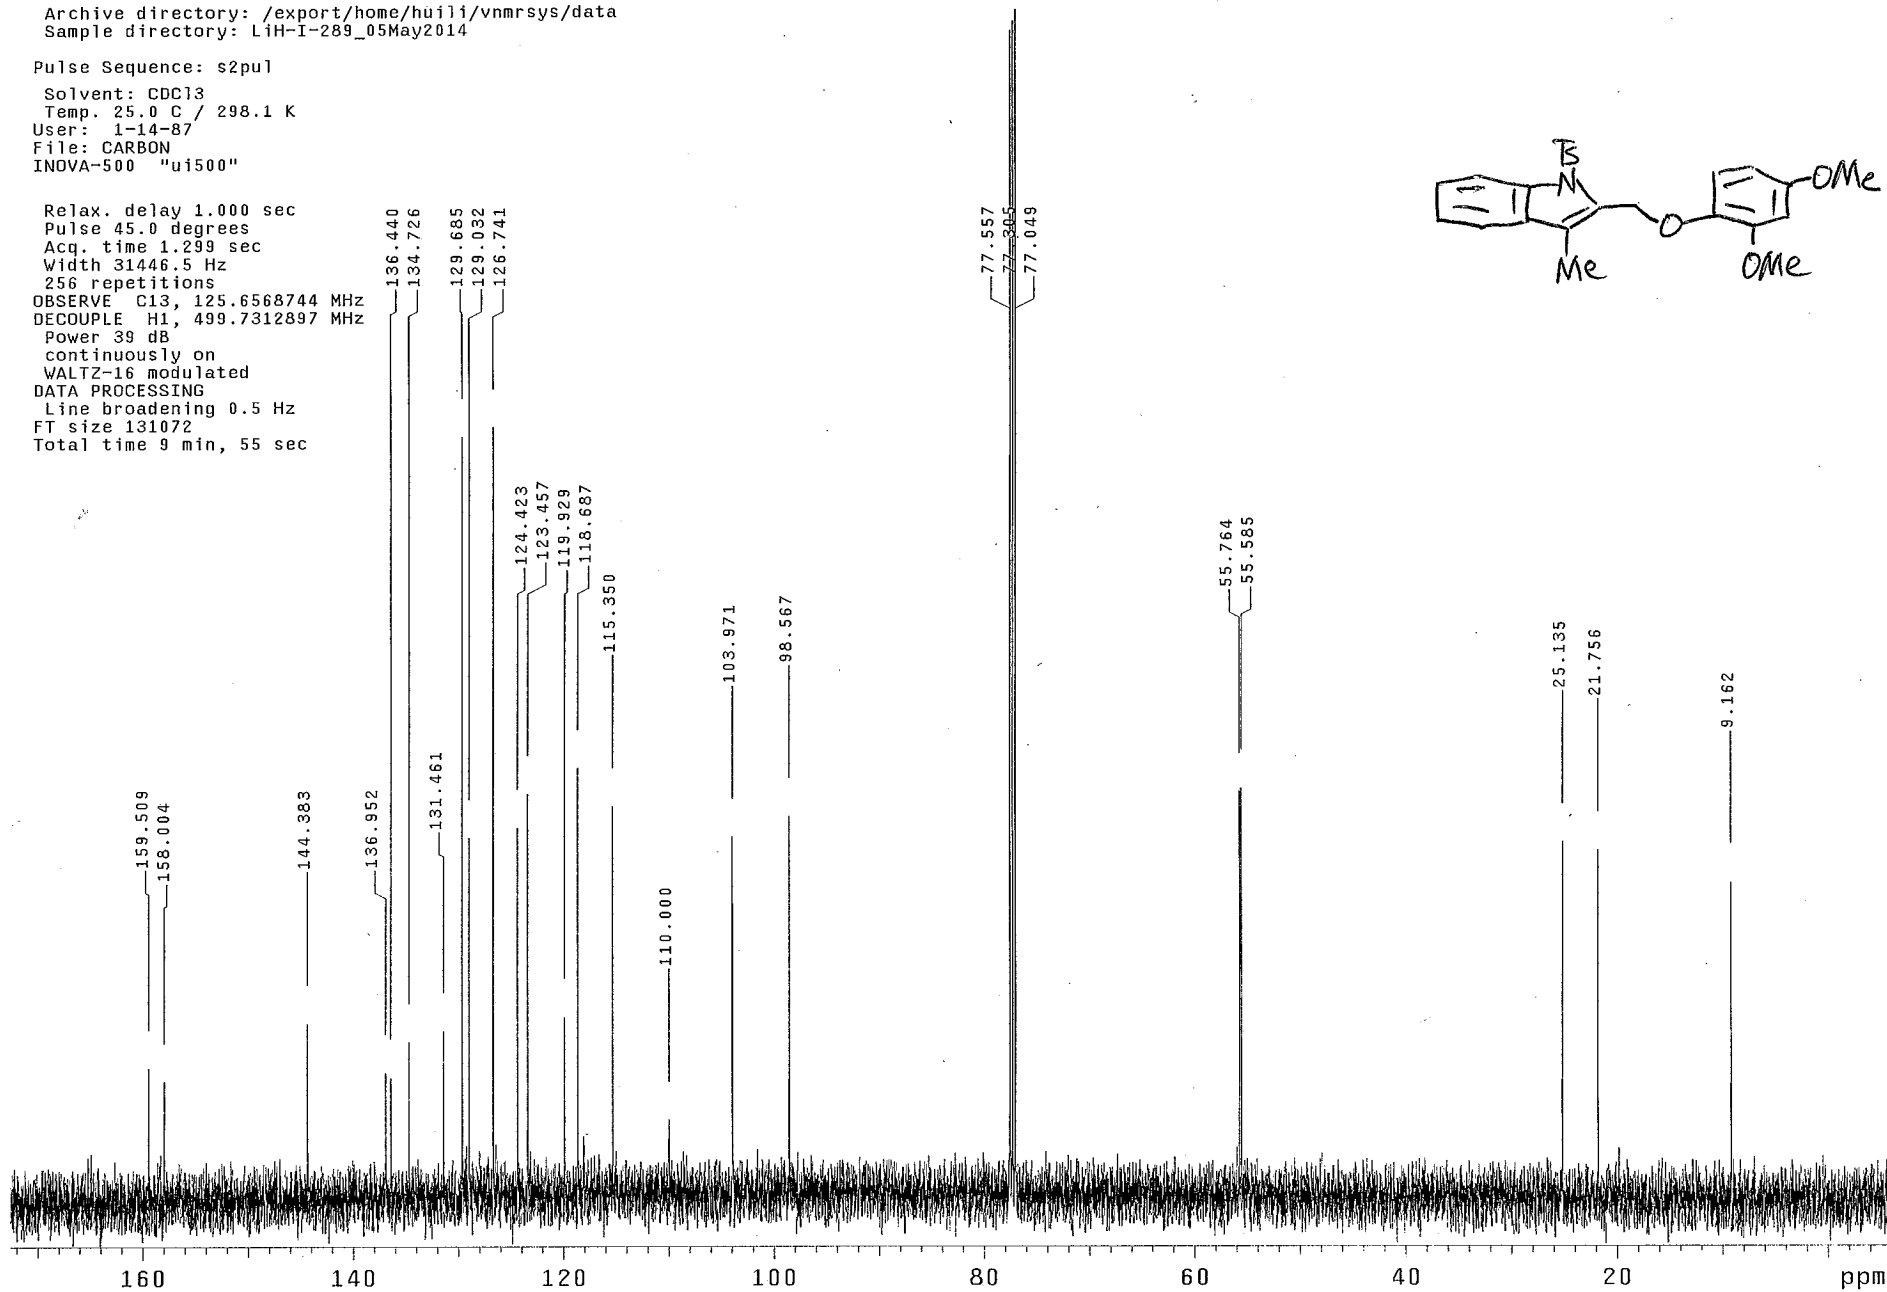

LiH-II-38\_06Jun2014

Archive directory: /export/home/huili/vnmrSYS/data  
Sample directory: LiH-II-38\_06Jun2014

Pulse Sequence: s2pu1

Solvent: CDCl<sub>3</sub>  
Temp. 25.0 C / 298.1 K  
File: PROTON  
INNOVA-500 "nmr03"

Relax. delay 1.000 sec  
Pulse 45.0 degrees  
Acq. time 3.754 sec  
Width 6387.7 Hz  
8 repetitions  
OBSERVE H1, 399.7865245 MHz  
DATA PROCESSING  
FT size 65536  
Total time 0 min, 57 sec

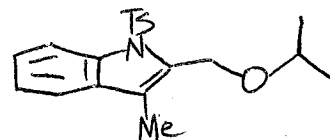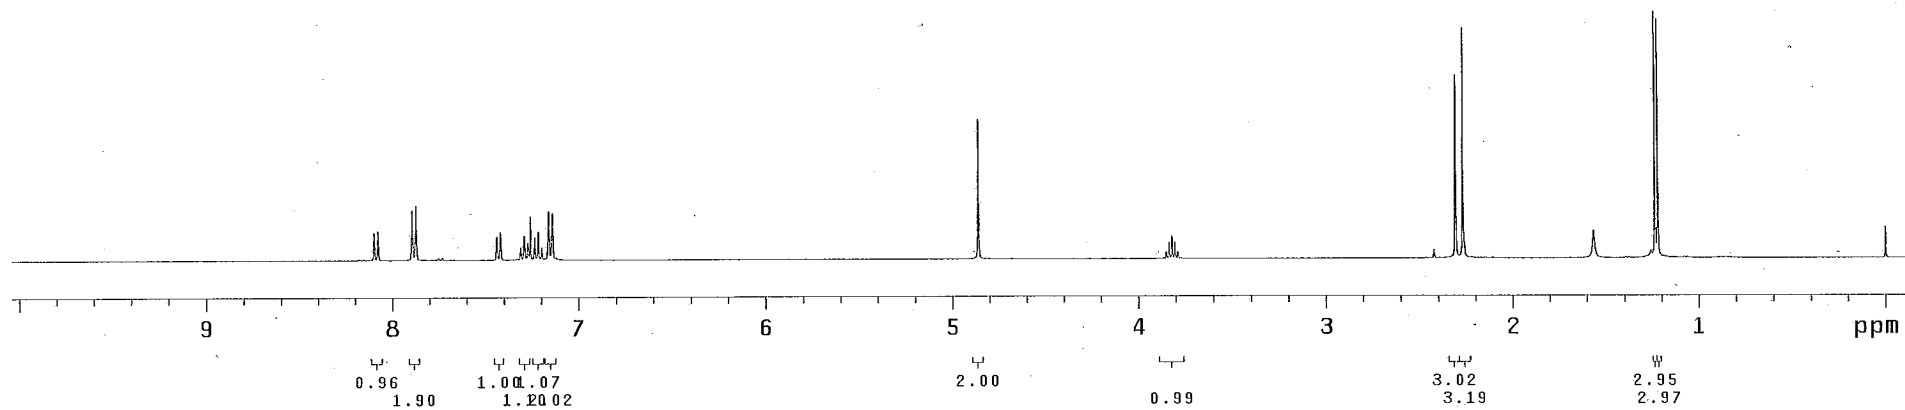

LiH-II-38\_06Jun2014-15:21:52

Archive directory: /export/home/huili/vnmrSYS/data  
Sample directory: LiH-II-38\_06Jun2014-15:21:52

Pulse Sequence: s2pul

Solvent: CDCl3  
Temp. 25.0 C / 298.1 K  
File: CARBON  
INOVA-500 "nmr03"

Relax. delay 1.000 sec  
Pulse 45.0 degrees  
Acq. time 1.197 sec  
Width 25157.2 Hz  
365 repetitions  
OBSERVE C13, 100.5263721 MHz  
DECOUPLE H1, 399.7885243 MHz  
Power 43 dB  
continuously on  
WALTZ-16 modulated  
DATA PROCESSING  
Line broadening 0.8 Hz  
FT size 65536  
Total time 18 min, 49 sec

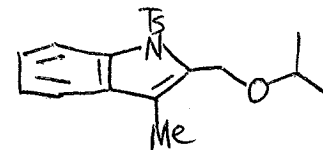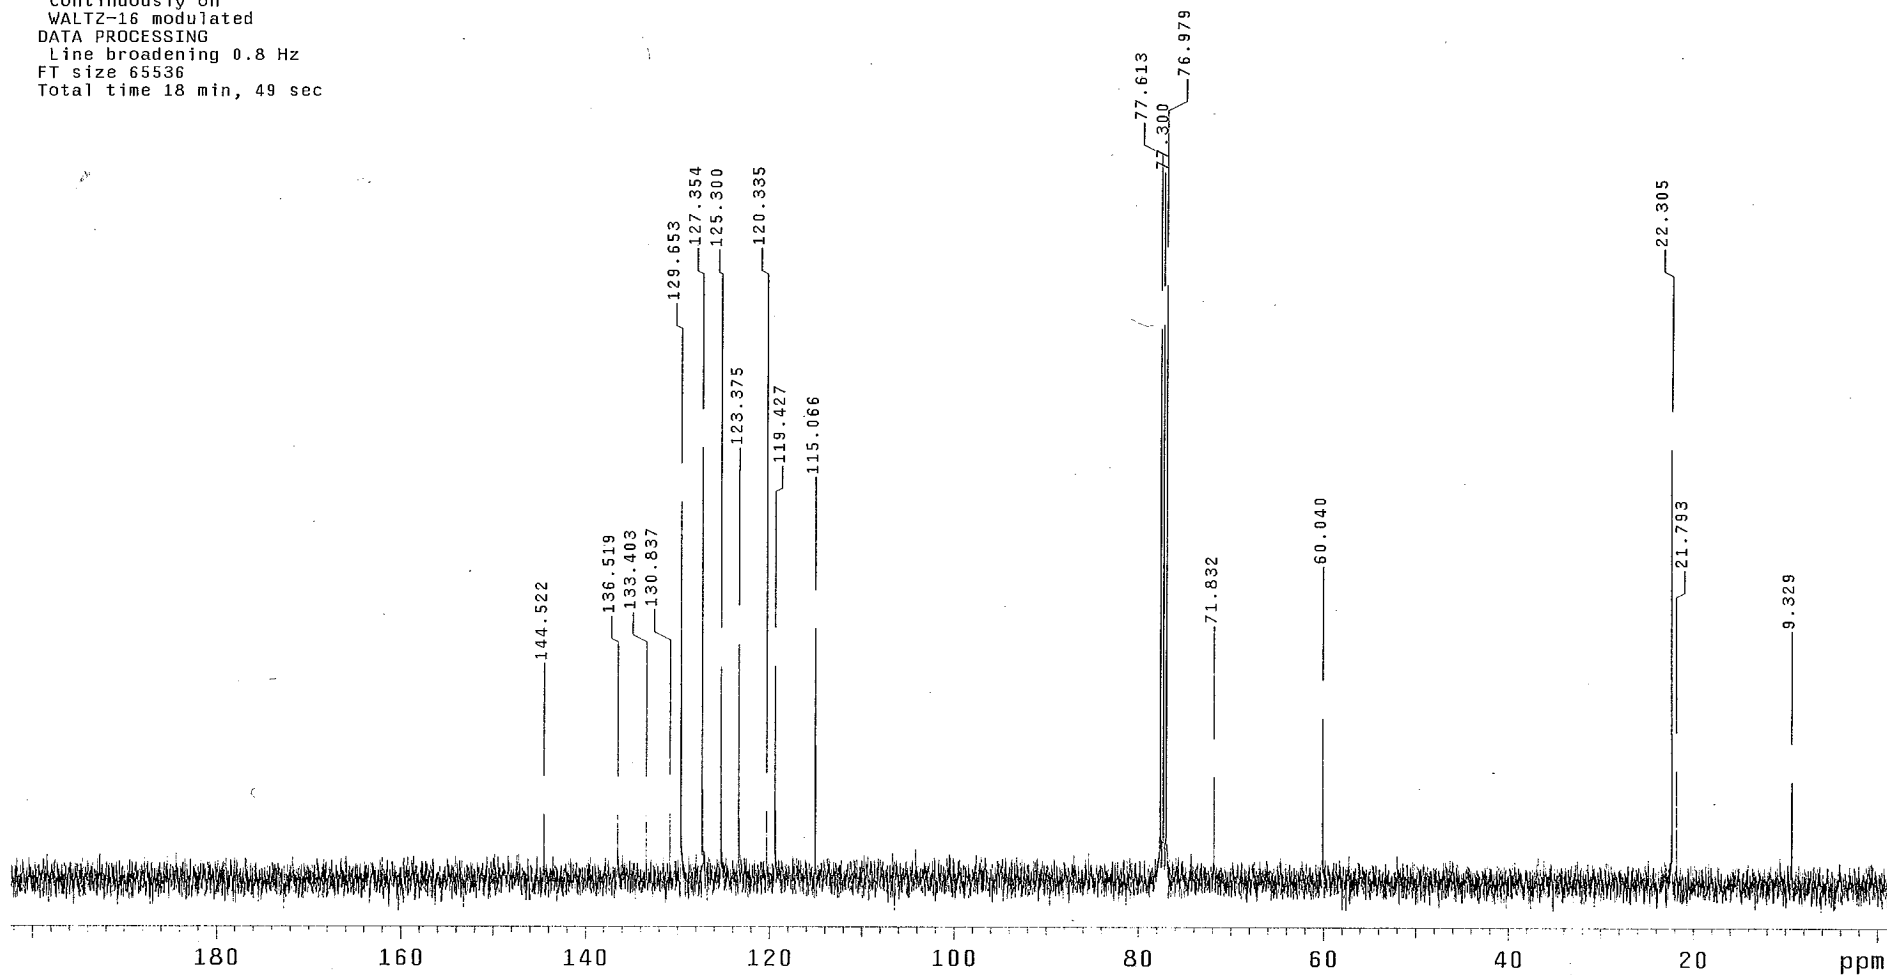

LiH-I-303\_07May2014

Archive directory: /export/home/huili/vnmrSYS/data  
Sample directory: LiH-I-303\_07May2014

Pulse Sequence: s2pu1

Solvent: CDCl3  
Temp. 25.0 C / 298.1 K  
File: PROTON  
INOVA-500 "nmr03"

Relax. delay 1.000 sec  
Pulse 45.0 degrees  
Acq. time 3.747 sec  
Width 8000.0 Hz  
8 repetitions  
OBSERVE H1, 499.7288241 MHz  
DATA PROCESSING  
Line broadening 0.5 Hz  
FT size 65536  
Total time 0 min, 38 sec

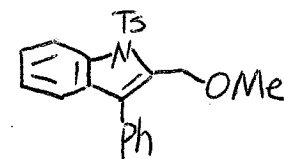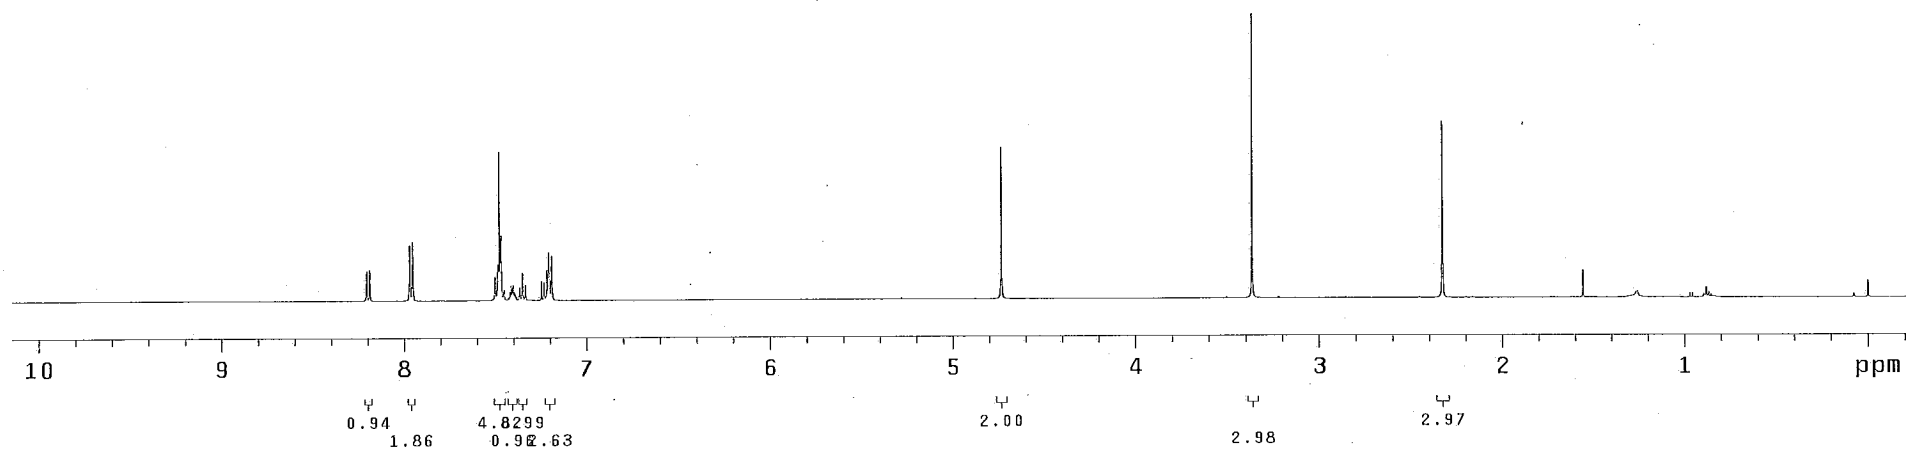

LiH-I-303\_07May2014-17:02:21

Archive directory: /export/home/huili/vnmrsys/data  
Sample directory: LiH-I-303\_07May2014-17:02:21

Pulse Sequence: s2pul

Solvent: CDCl3  
Temp. 25.0 C / 298.1 K  
User: 1-14-87  
File: CARBON  
INOVA-500 "nmr03"

Relax. delay 1.000 sec  
Pulse 45.0 degrees  
Acq. time 1.299 sec  
Width 31446.5 Hz  
187 repetitions  
OBSERVE C13, 125.6568760 MHz  
DECOUPLE H1, 499.7312897 MHz  
Power 39 dB  
continuously on  
WALTZ-16 modulated  
DATA PROCESSING  
Line broadening 0.5 Hz  
FT size 131072  
Total time 9 min, 55 sec

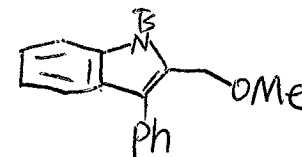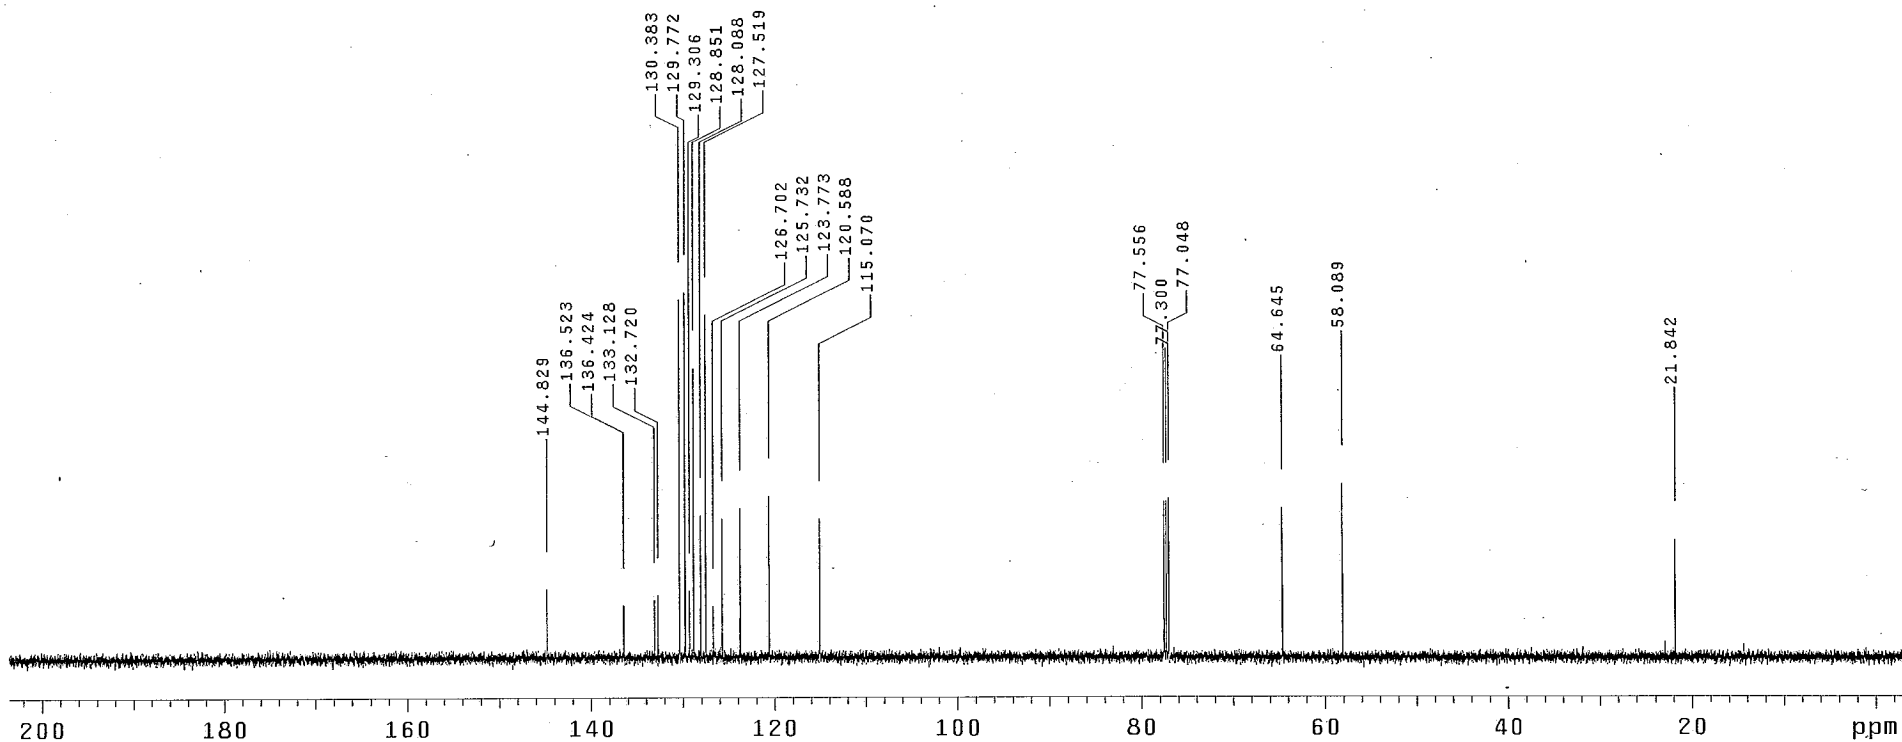

Supplement: c4cc05901h1.pdf [file c4cc05901h1.pdf]
